# Supplementary material
Source: PubMed Central journal article supplement (PMC3711142)
Supplement: NIHMS484775-supplement-01.pdf [file NIHMS484775-supplement-01.pdf]

## Supplementary Data

### Hydropropidine: A novel, cell-impermeant fluorogenic probe for detecting extracellular superoxide

Radoslaw Michalski, Jacek Zielonka, Micael Hardy, Joy Joseph,  
and Balaraman Kalyanaraman

#### Table of contents

|                                                                          |    |
|--------------------------------------------------------------------------|----|
| 1. Table of contents.....                                                | 1  |
| 2. Figure legends.....                                                   | 2  |
| 3. NMR spectra of hydropropidine (HPr <sup>+</sup> ).....                | 4  |
| 4. NMR spectra of 2-hydroxypropidium (2-OH-Pr <sup>++</sup> ).....       | 17 |
| 5. NMR spectra of propidium (Pr <sup>++</sup> ).....                     | 29 |
| 6. NMR spectra of dipropidium (Pr <sup>++</sup> -Pr <sup>++</sup> )..... | 41 |

## Supplementary Figures legends.

**Supplementary Figure 1: NMR spectra of hydropropidine (HPr<sup>+</sup>) in DMSO-*d*6.** (a) <sup>1</sup>H NMR, (b) <sup>13</sup>C APT, (c) HSQC, (d) HMBC. <sup>1</sup>H NMR (400.13 MHz): δ 7.32 (H<sub>10</sub>, d, *J* = 8.3), 7.29 (H<sub>1</sub>, d, *J* = 8.8), 7.22-7.12 (5H, m), 6.47 (H<sub>9</sub>, d, *J* = 8.3, 2.3), 6.34 (H<sub>7</sub>, d, *J* = 2.3), 6.03 (H<sub>2</sub>, m, *J* = 8.5), 6.01 (H<sub>4</sub>, br.s), 5.34 (H<sub>6</sub>, s), 4.94 (2H (NH<sub>2</sub>), s), 4.85 (2H (NH<sub>2</sub>), s), 3.32-3.04 (8H, m), 2.87 (3H, s), 2.07-1.81 (2H, m), 1.15, (6H, t, *J* = 6.9). <sup>13</sup>C APT (75.47 MHz): δ 148.6 (C, s) 146.7, (C, s), 143.9 (C, s), 143.4 (C<sub>5a</sub>, s), 135.0 (C<sub>6a</sub>, s), 128.6 (2C<sub>Ph</sub>, s), 127.4 (C<sub>Ph</sub>, s), 126.8 (2C<sub>Ph</sub>, s), 123.0 (C<sub>1</sub>, s), 122.2 (C<sub>10</sub>, s), 120.0 (C<sub>10a</sub>, s), 114.3 (C<sub>9</sub>, s), 112.7 (C<sub>1a</sub>, s), 111.9 (C<sub>7</sub>, s), 104.7 (C<sub>2</sub>, s), 98.5 (C<sub>4</sub>, s), 65.5 (C<sub>6</sub>, s), 57.8 (C, CH<sub>2</sub>, s), 56.2 (2C, CH<sub>2</sub>, s), 47.0 (C, CH<sub>3</sub>), 46.2 (C, CH<sub>2</sub>), 20.2, (CH<sub>2</sub>, s), 7.8 (2CH<sub>3</sub>, s). HRMS calculated for C<sub>27</sub>H<sub>35</sub>N<sub>4</sub>I<sub>2</sub> [C<sub>27</sub>H<sub>35</sub>N<sub>4</sub>]<sup>+</sup> 415.2856, found 415.2858.

**Supplementary Figure 2: NMR spectra of 2-hydroxypropidium (2-OH-Pr<sup>++</sup>) in DMSO-*d*6.** (a) <sup>1</sup>H NMR, (b) <sup>13</sup>C APT, (c) HSQC, (d) HMBC. <sup>1</sup>H NMR (400.13 MHz): δ 8.35 (H<sub>10</sub>, d, *J* = 9.3), 8.01 (H<sub>1</sub>, s), 7.82-7.69 (5H, m), 7.54 (H<sub>4</sub>, s), 7.52 (H<sub>9</sub>, d, *J* = 9.0, 2.5), 6.25 (H<sub>7</sub>, d, *J* = 2.3), 4.44 (2H, br.t), 3.21 (6H, (3CH<sub>2</sub>) br.q), 2.84 (3H, s), 2.20 (2H, bquint.), 1.13, (6H, t, *J* = 7.2). <sup>13</sup>C APT (75.47 MHz): δ 153.9 (C<sup>IV</sup>, s), 148.3 (C<sup>IV</sup>, s), 148.0 (C<sup>IV</sup>, s), 142.8, (C<sup>IV</sup>, s), 132.2 (C<sup>IV</sup>, s), 131.9 (C<sup>IV</sup>, s), 130.8 (C<sub>Ph</sub>, s), 129.5 (2C<sub>Ph</sub>, s), 128.7 (2C<sub>Ph</sub>, s), 128.5 (C, s), 127.5 (C<sub>9</sub>, s), 125.1 (C<sub>10a</sub>, s), 122.5 (C<sub>10</sub>, s), 119.2 (C<sub>1a</sub>, s), 107.4 (C<sub>7</sub>, s), 103.8 (C<sub>1</sub>, s), 98.6 (C<sub>4</sub>, s), 56.0 (2C, CH<sub>2</sub>, s), 55.4 (C, CH<sub>2</sub>), 50.2, (CH<sub>2a</sub>, s), 46.6 (C, CH<sub>3</sub>), 21.4 (CH<sub>2b</sub>, s), 7.4 (2CH<sub>3</sub>, s). HRMS calculated for C<sub>27</sub>H<sub>34</sub>N<sub>4</sub>I<sub>2</sub>O [C<sub>27</sub>H<sub>34</sub>N<sub>4</sub>O]<sup>++</sup> 215.1360, found 215.1360.

**Supplementary Figure 3: NMR spectra of propidium (Pr<sup>++</sup>) in DMSO-*d*6.** (a) <sup>1</sup>H NMR, (b) <sup>13</sup>C APT, (c) HSQC, (d) HMBC. <sup>1</sup>H NMR (400.13 MHz): δ 8.70 (H<sub>1</sub>, d, *J* = 9.3), 8.64 (H<sub>10</sub>, d, *J* = 9.3), 7.82-7.73 (5H, m), 7.56 (H<sub>4</sub>, d, *J* = 1.5), 7.54 (H<sub>9</sub>, d, *J* = 9.3, 2.3), 7.36 (H<sub>2</sub>, dd, *J* = 9.3, 1.5), 6.38 (2H (NH<sub>2</sub>), s), 6.26 (H<sub>7</sub>, d, *J* = 2.5), 5.99 (2H, (NH<sub>2</sub>), s), 4.44 (2H, br.t), 3.23 (6H, (3CH<sub>2</sub>) br.q), 2.89 (3H, s), 2.22 (2H, br.quint.), 1.14, (6H, t, *J* = 7.0). <sup>13</sup>C APT (75.47 MHz): δ 158.7 (C<sub>6</sub>, s), 151.2 (C<sub>3</sub>, s), 148.0 (C<sub>8</sub>, s), 134.2 (C<sub>5a</sub>, s), 131.9 (1C<sup>IV</sup>, s), 130.9 (1C, s), 129.5 (2C, s), 128.3 (2C, s), 128.2 (C<sub>9</sub>, s), 127.6 (1C<sup>IV</sup>, s), 125.0 (1C<sup>IV</sup>, s), 124.8 (C<sub>1</sub>, s), 122.7 (C<sub>10</sub>, s), 120.0 (C<sub>2</sub>, s), 117.5 (C<sub>1a</sub>, s), 107.8 (C<sub>7</sub>, s), 98.1 (C<sub>4</sub>, s), 56.0 (2C, CH<sub>2</sub>, s), 55.5 (C, CH<sub>2</sub>), 50.2, (CH<sub>2a</sub>, s), 46.7 (C, CH<sub>3</sub>), 21.2 (CH<sub>2b</sub>, s), 7.6 (2CH<sub>3</sub>, s). HRMS calculated for C<sub>27</sub>H<sub>34</sub>N<sub>4</sub>I<sub>2</sub> [C<sub>27</sub>H<sub>34</sub>N<sub>4</sub>]<sup>++</sup> 207.1386, found 207.1385.

**Supplementary Figure 4: NMR spectra of dipropidium (Pr<sup>++</sup>-Pr<sup>++</sup>) in DMSO-*d*6.** (a) <sup>1</sup>H NMR, (b) <sup>13</sup>C APT, (c) HSQC, (d) HMBC. <sup>1</sup>H NMR (400.13 MHz): δ 8.70 (H<sub>10</sub>, d, *J* = 9.0), 8.69 (H<sub>1</sub>, s), 7.87-7.78 (5H, m), 7.73 (H<sub>4</sub>, d, *J* = 6.5), 7.54 (H<sub>9</sub>, d, *J* = 9.0, 2.1), 6.34 (H<sub>7</sub>, d, *J* = 2.1), 4.53 (2H, br.t), 3.25 (6H, (3CH<sub>2</sub>) br.q), 2.88 (3H, s), 2.28 (2H, br.quint.), 1.15, (6H, t, *J* = 7.1). <sup>13</sup>C APT (75.47 MHz): δ 159.4 (C, s), 158.1 (C, s), 157.8 (C, s), 148.9 (C, s), 148.5 (C, s), 134.0 (C, s), 131.7 (C, s), 131.2 (C<sub>ph</sub>, s), 129.6 (C<sub>ph</sub>, s), 128.3 (C<sub>4</sub>, s), 128.2 (C<sub>9</sub>, s), 127.6 (C, s), 127.3 (C, s), 126.2 (C<sub>1</sub>, s), 125.2 (C, s), 123.2 (C<sub>10</sub>, s), 117.9 (C, s), 108.1 (C<sub>7</sub>, s), 100.1 (C, s), 56.0 (2C, CH<sub>2</sub>, s), 55.4 (C, CH<sub>2</sub>), 50.4 (CH<sub>2</sub>, s), 46.7 (CH<sub>3</sub>), 21.3 (CH<sub>2</sub>, s), 7.4 (2CH<sub>3</sub>, s).

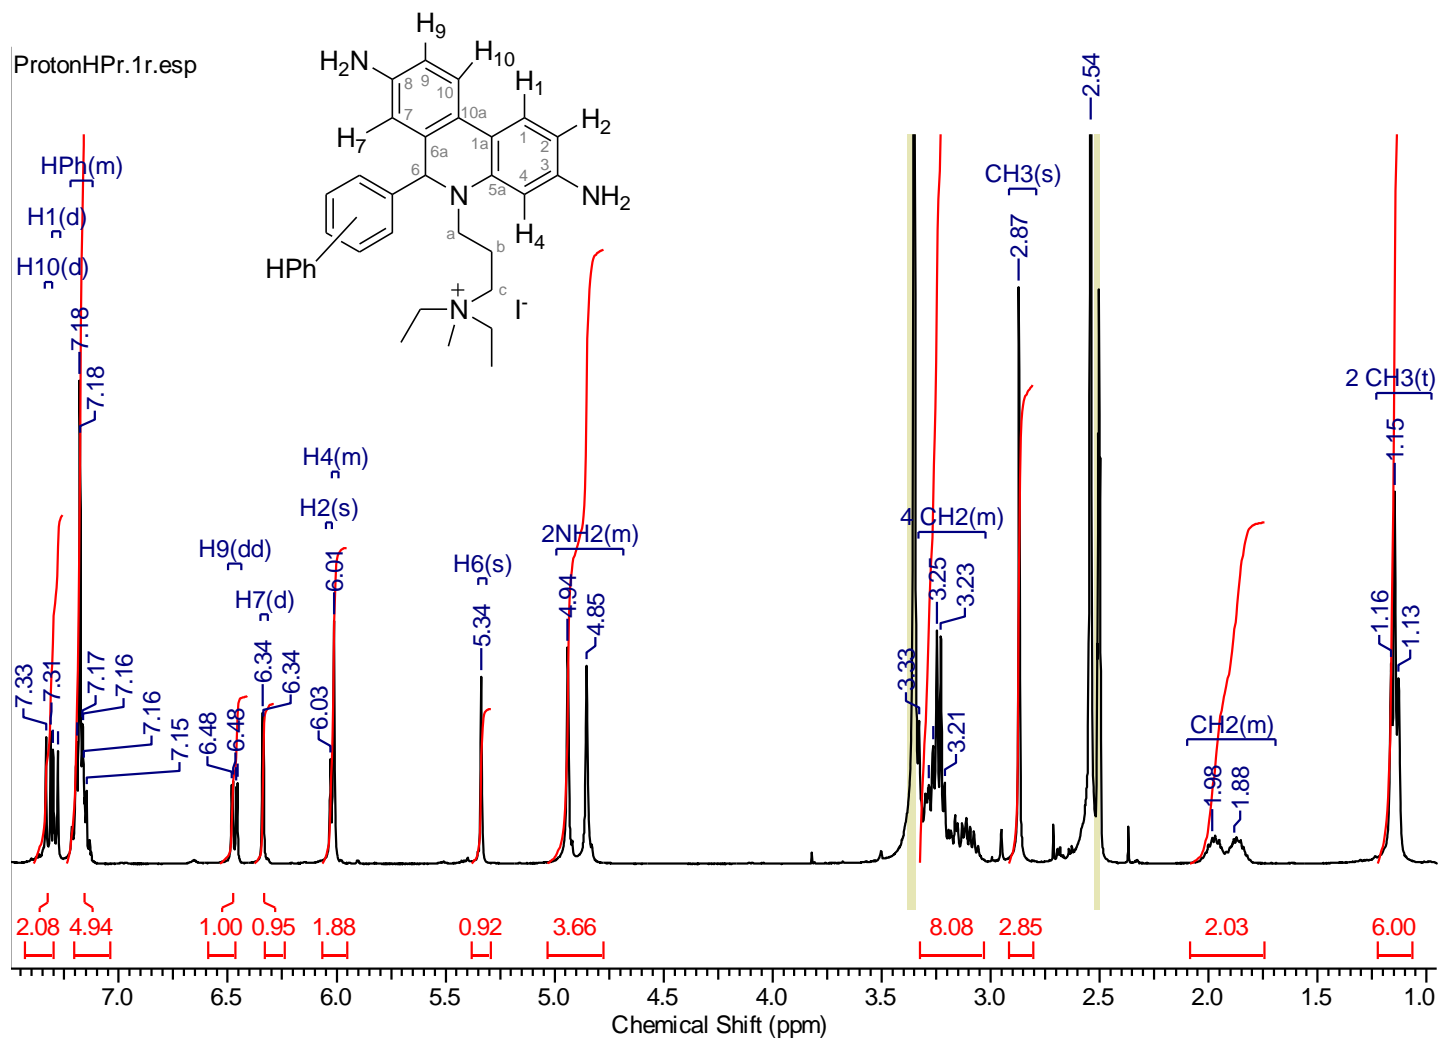

**Supplementary Figure 1a.** <sup>1</sup>H NMR spectrum of hydropropidine (HPr<sup>+</sup>) in DMSO-*d*<sub>6</sub>

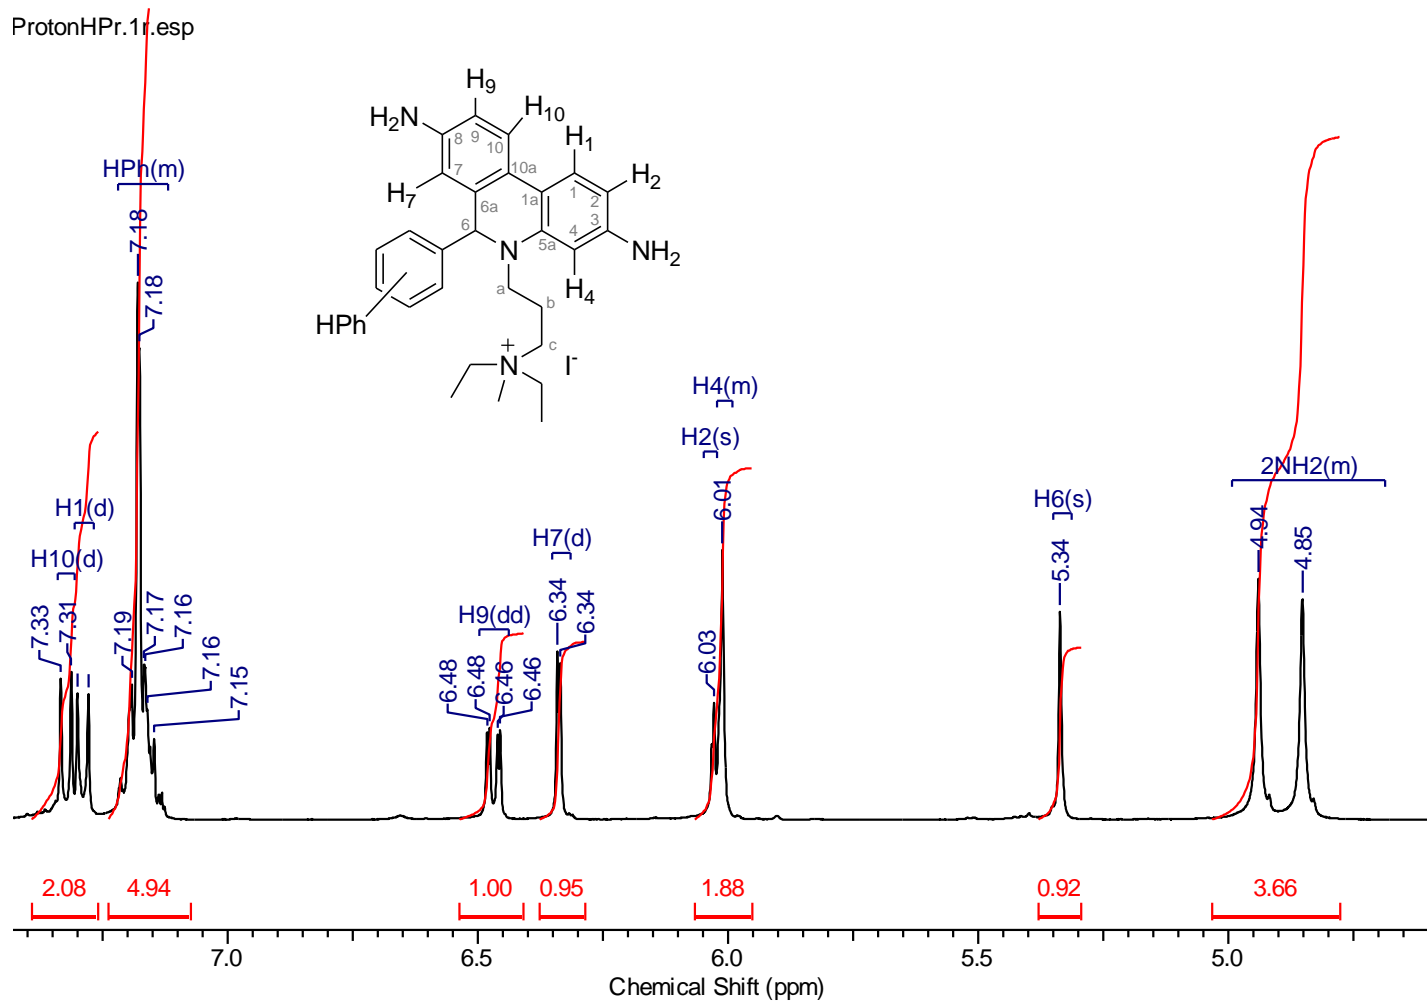

**Supplementary Figure 1a.** <sup>1</sup>H NMR spectrum of hydropropidine (HPr<sup>+</sup>) in DMSO-*d*<sub>6</sub> (zoomed region 4.5 – 7.5 ppm).

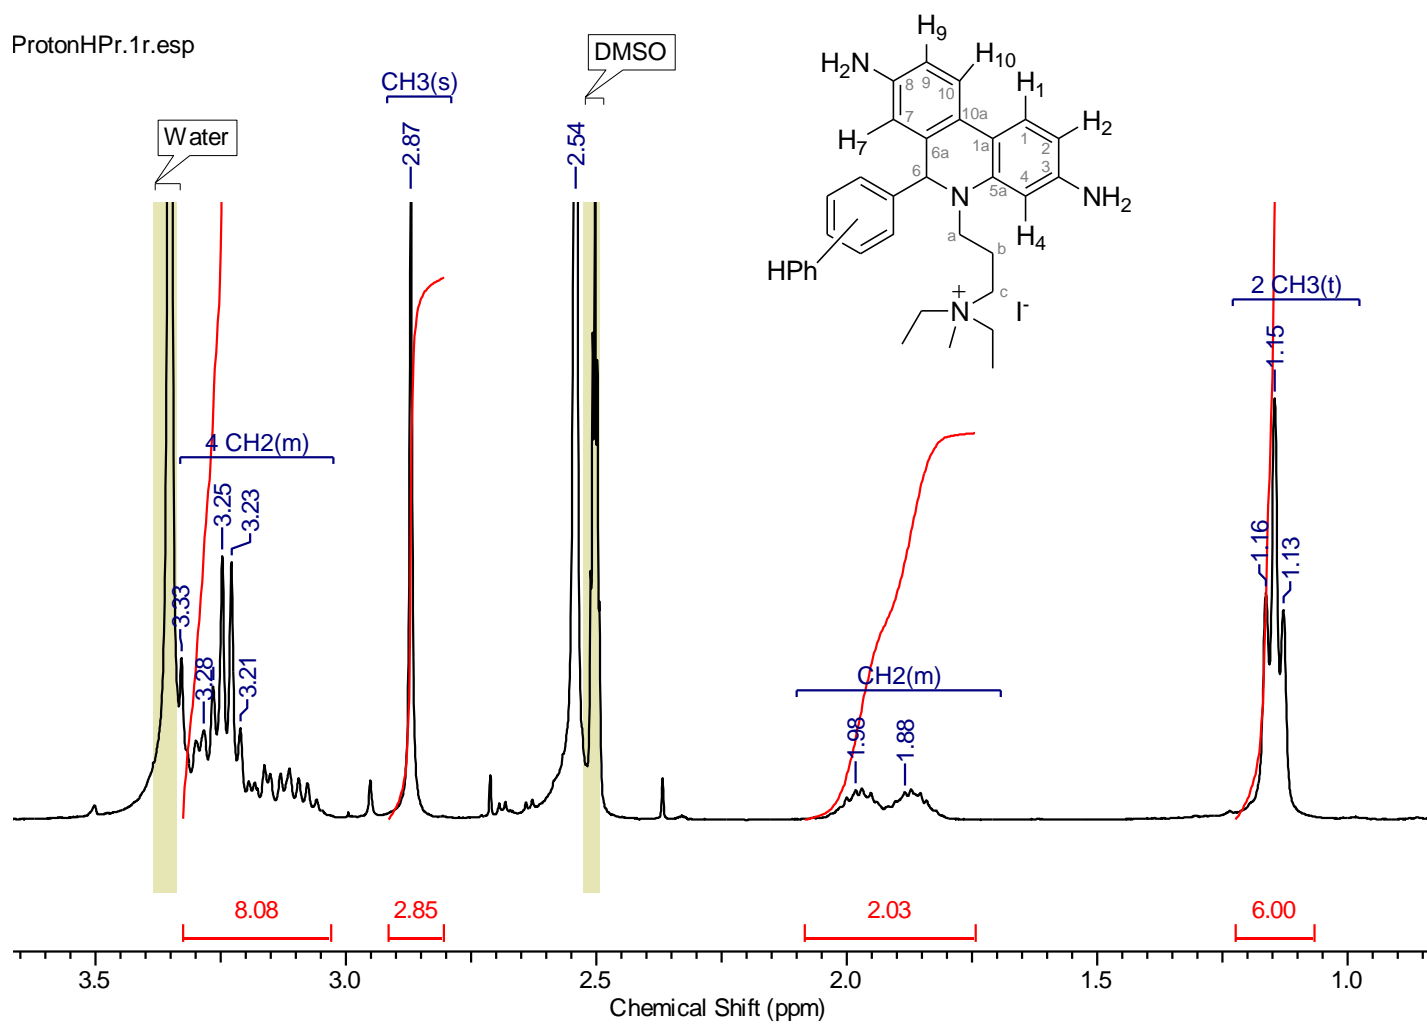

**Supplementary Figure 1a.** <sup>1</sup>H NMR spectrum of hydropropidine (HPr<sup>+</sup>) in DMSO-*d*<sub>6</sub> (zoomed region 0.8 – 3.2 ppm).

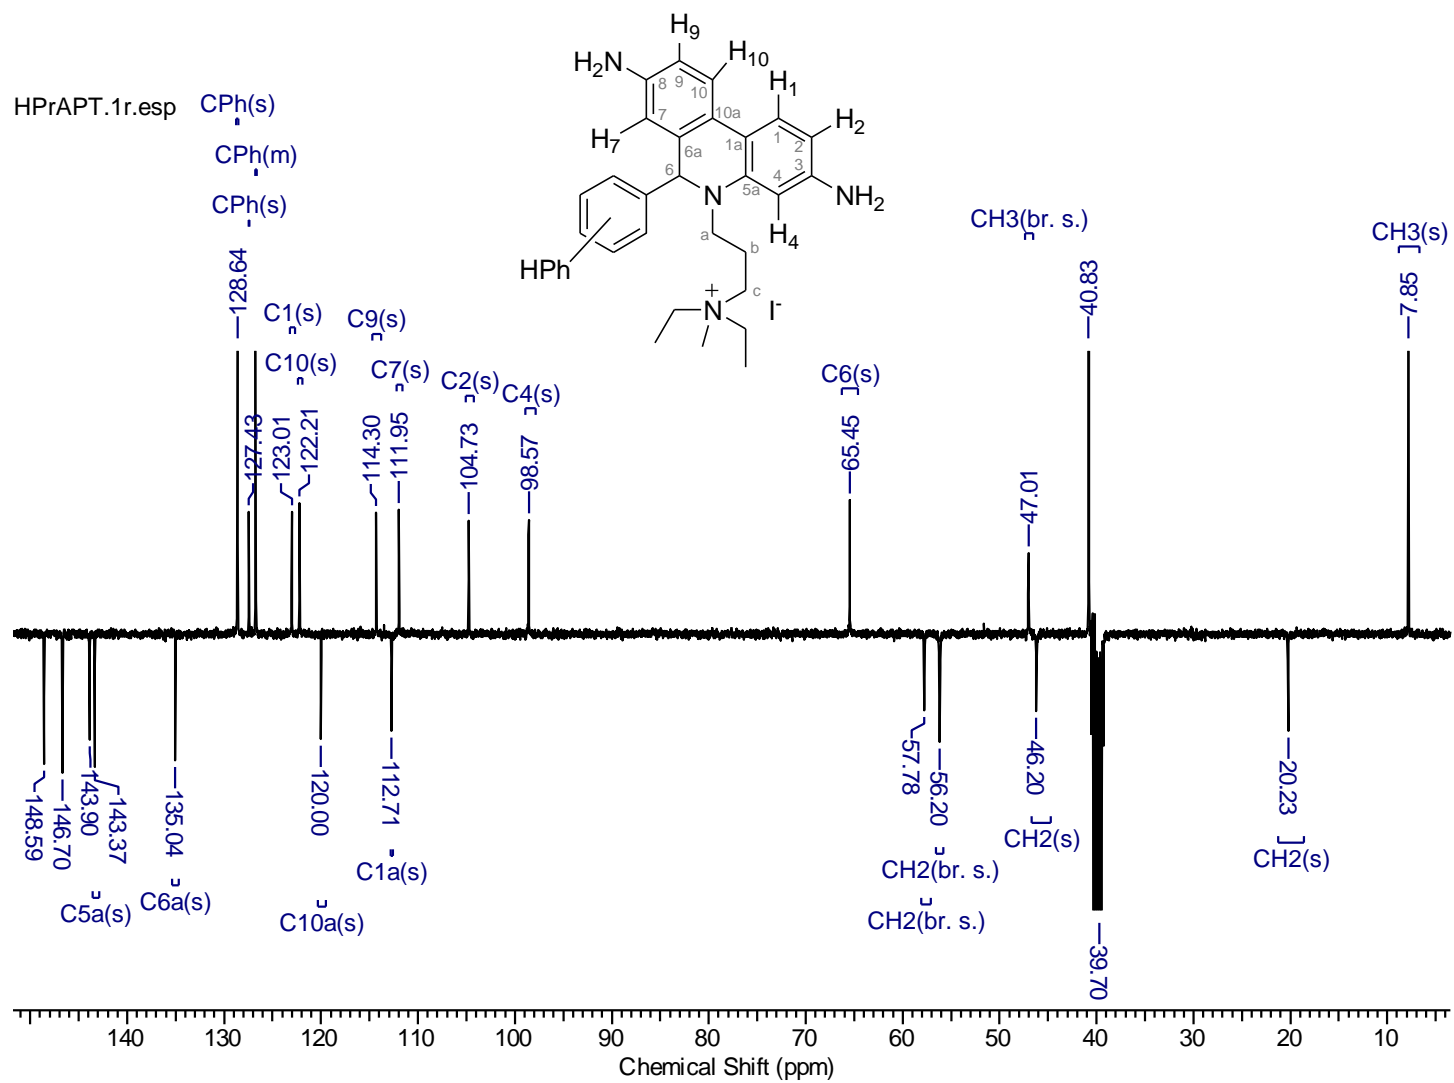

**Supplementary Figure 1b.** <sup>13</sup>C APT NMR spectrum of hydropropidine (HPr<sup>+</sup>) in DMSO-*d*<sub>6</sub>.

HPrAPT.1r.esp

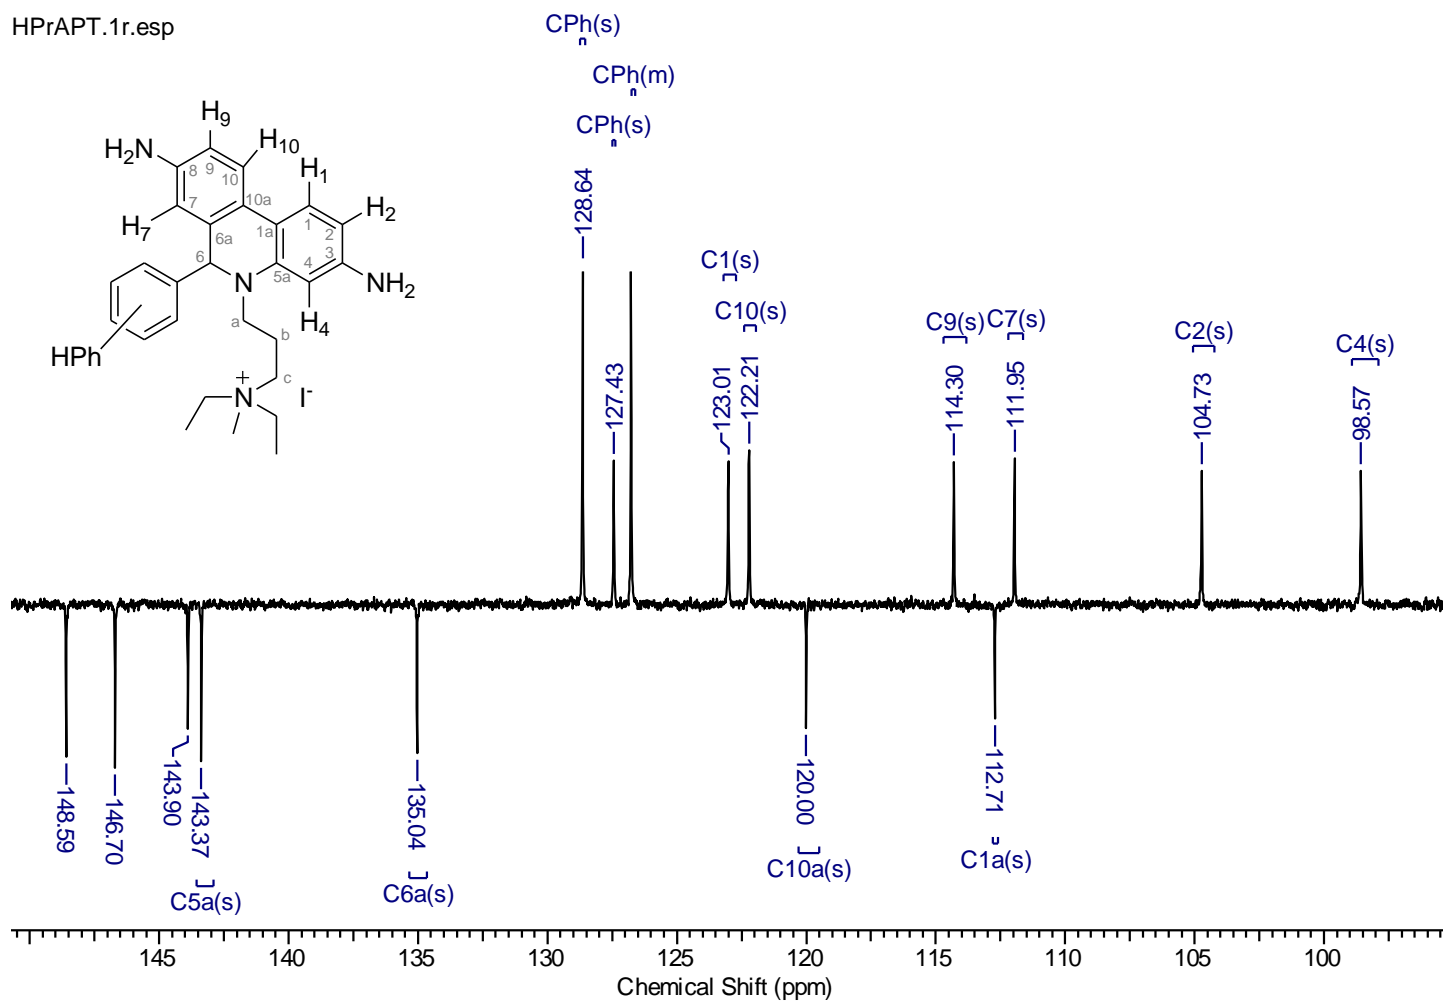

**Supplementary Figure 1b.** <sup>13</sup>C APT NMR spectrum of hydropropidine (HPr<sup>+</sup>) in DMSO-*d*<sub>6</sub> (zoomed region 95 – 150 ppm).



HPrAPT.1r.esp

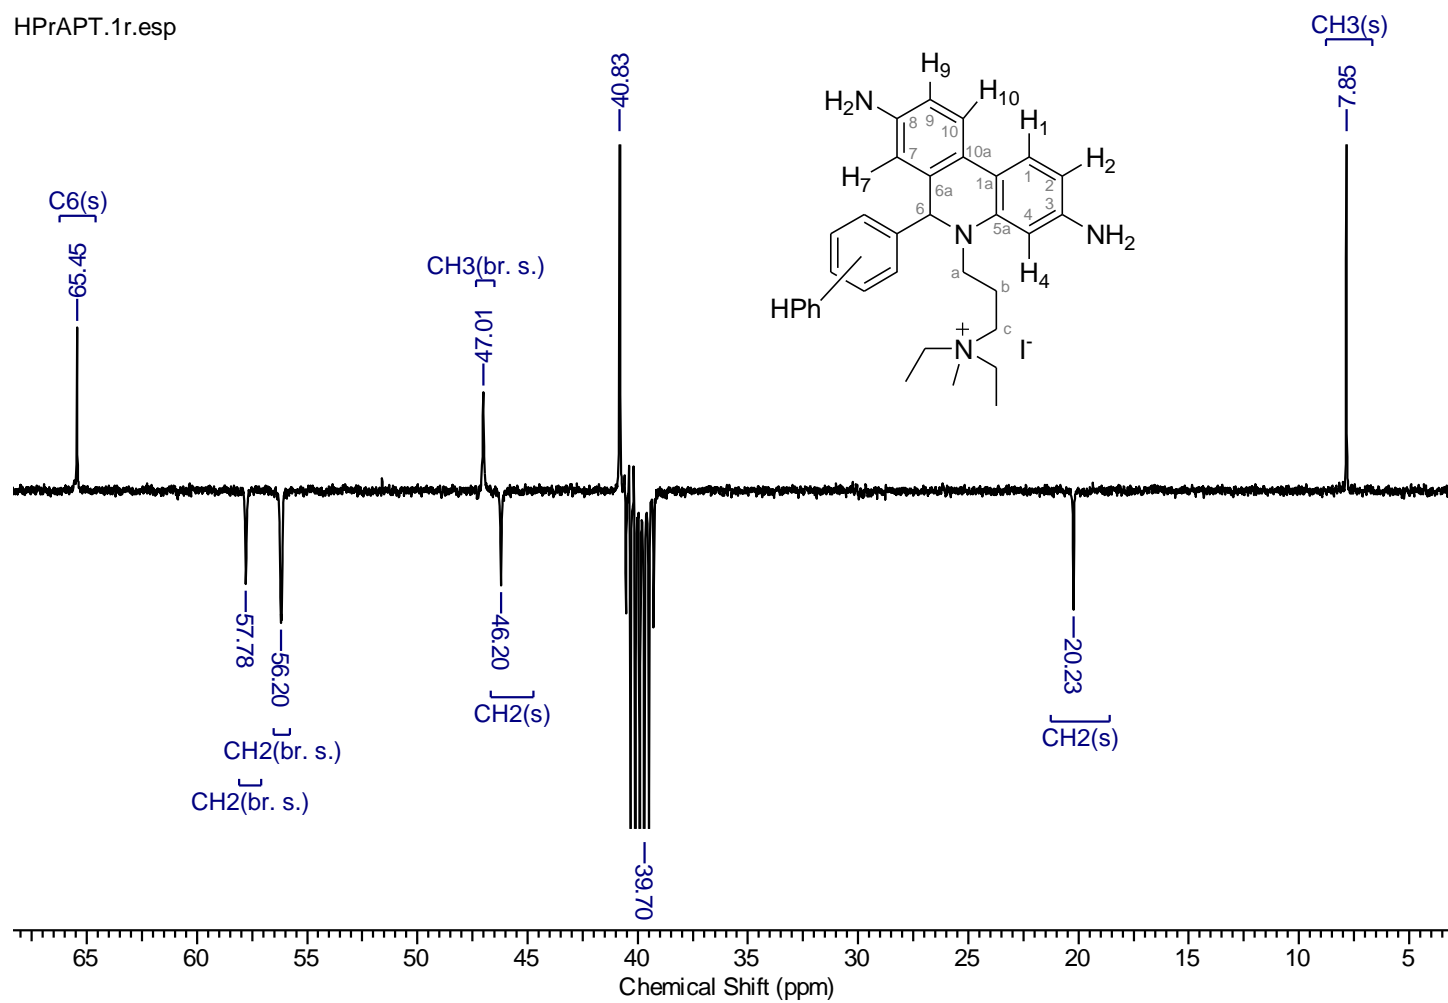

**Supplementary Figure 1b.**  $^{13}\text{C}$  APT NMR spectrum of hydropropidine ( $\text{HPr}^+$ ) in  $\text{DMSO-}d_6$  (zoomed region 9 – 68 ppm).

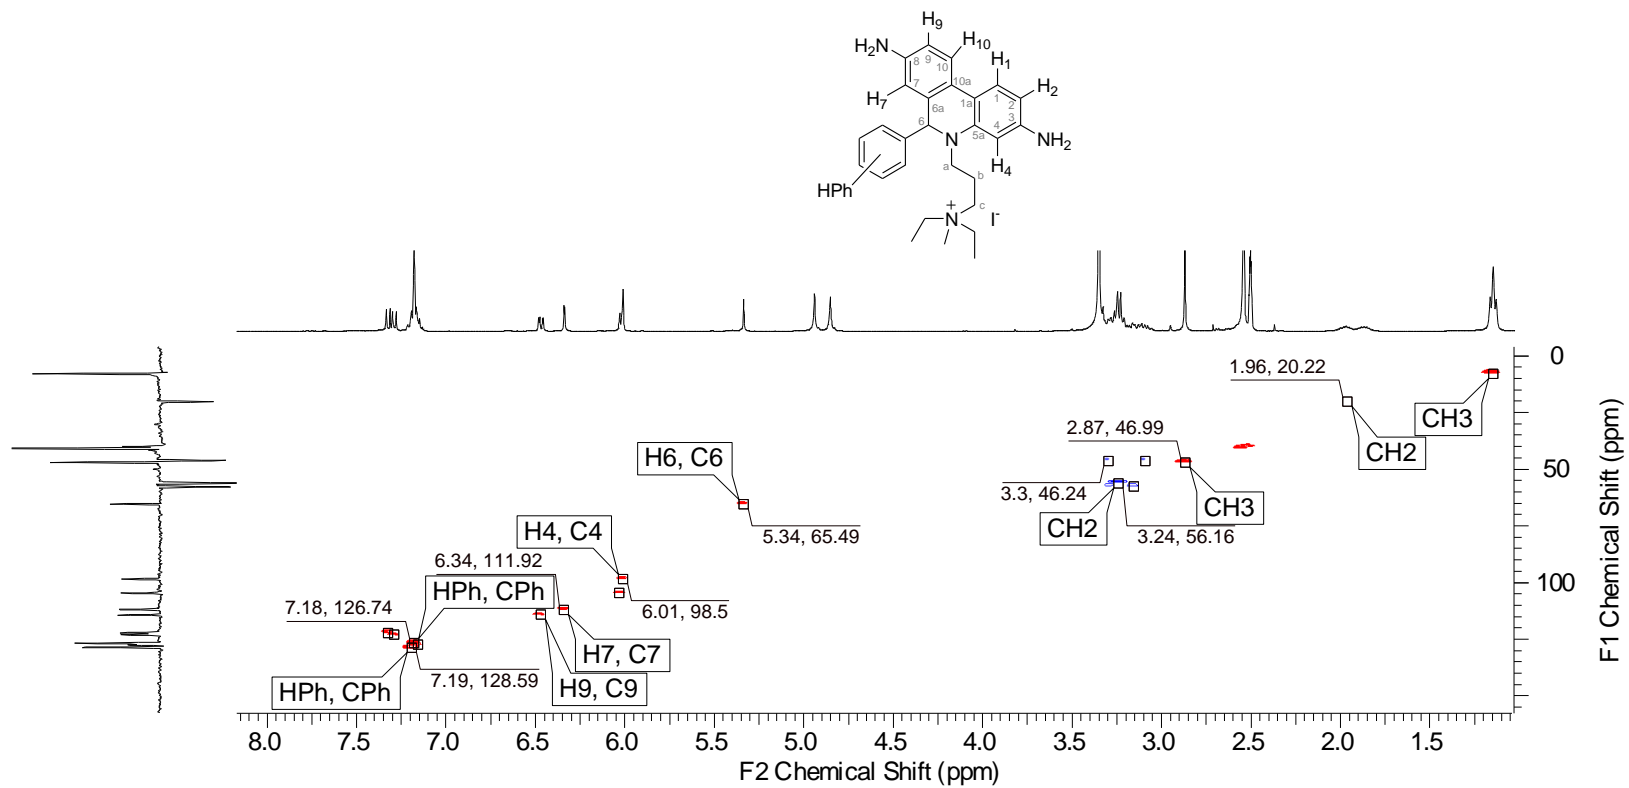

**Supplementary Figure 1c.** <sup>1</sup>H-<sup>13</sup>C HSQC NMR spectrum of hydropropidine (HPr<sup>+</sup>) in DMSO-*d*<sub>6</sub>.

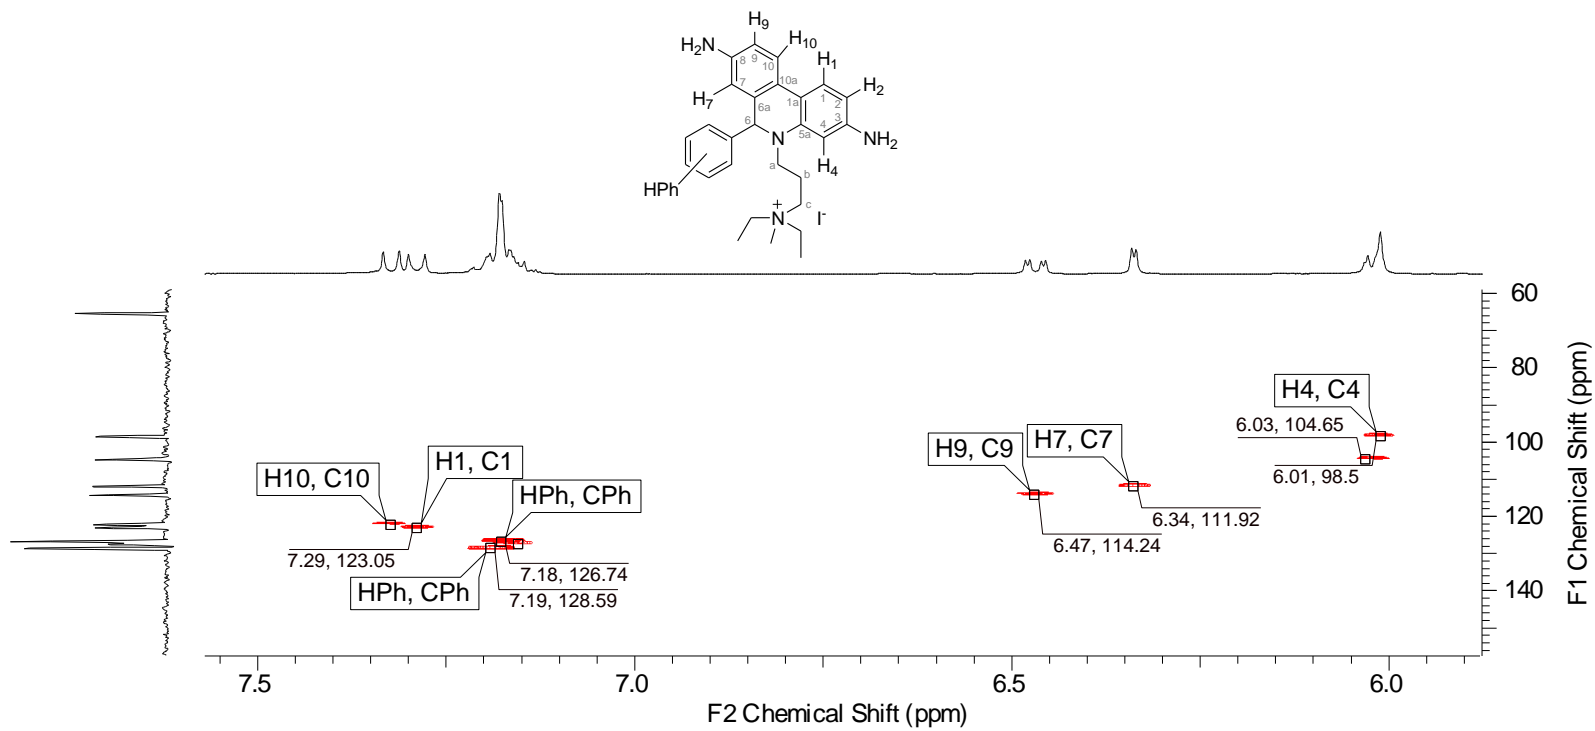

**Supplementary Figure 1c.** <sup>1</sup>H-<sup>13</sup>C HSQC NMR spectrum of hydropropidine (HPr<sup>+</sup>) in DMSO-*d*<sub>6</sub> (zoomed).

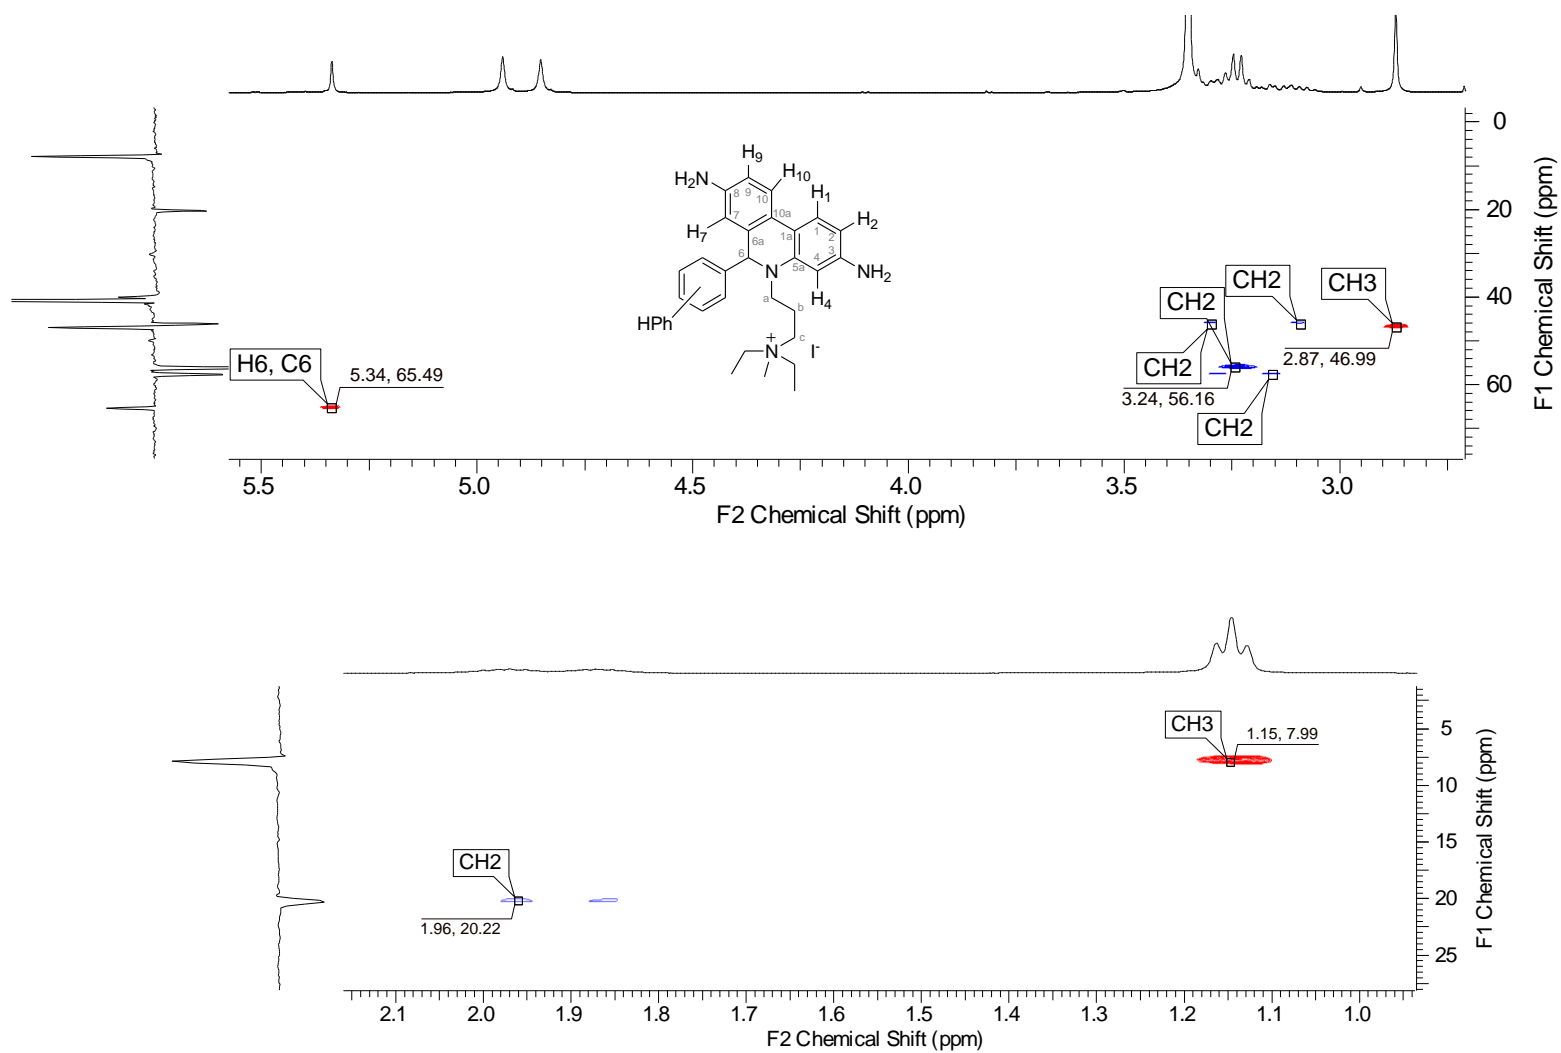

**Supplementary Figure 1c.**  $^1\text{H}$ - $^{13}\text{C}$  HSQC NMR spectrum of hydropropidine ( $\text{HPr}^+$ ) in  $\text{DMSO-}d_6$  (zoomed).

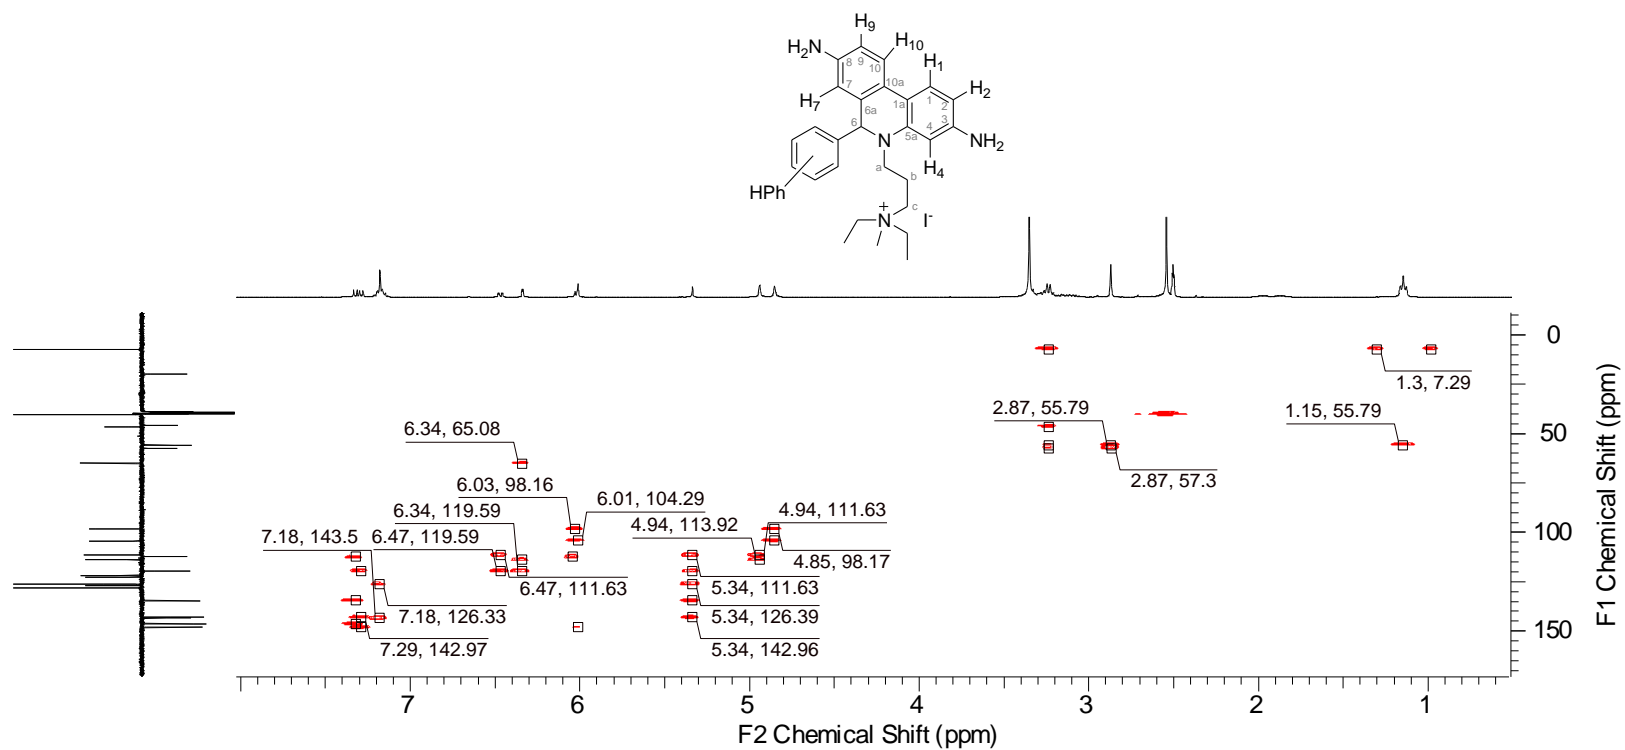

**Supplementary Figure 1d.** <sup>1</sup>H-<sup>13</sup>C HMBC NMR spectrum of hydropropidine (HPr<sup>+</sup>) in DMSO-*d*<sub>6</sub>.

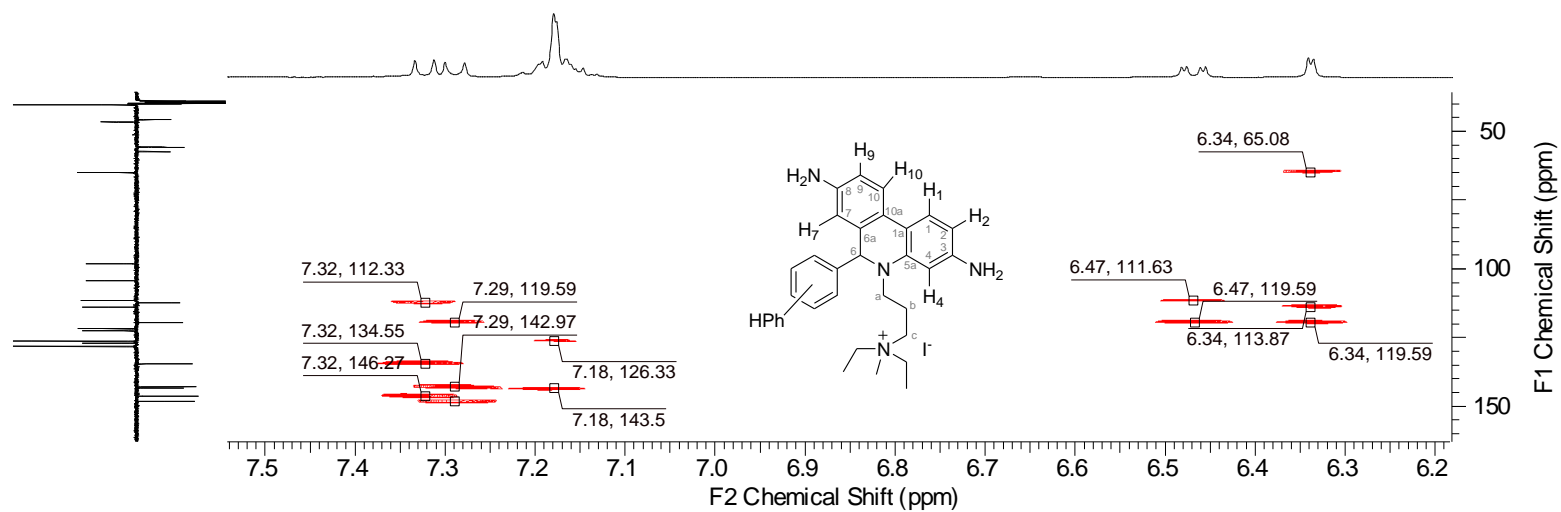

**Supplementary Figure 1d.**  $^1\text{H}$ - $^{13}\text{C}$  HMBC NMR spectrum of hydropropidine (HPr<sup>+</sup>) in DMSO-*d*<sub>6</sub> (zoomed).

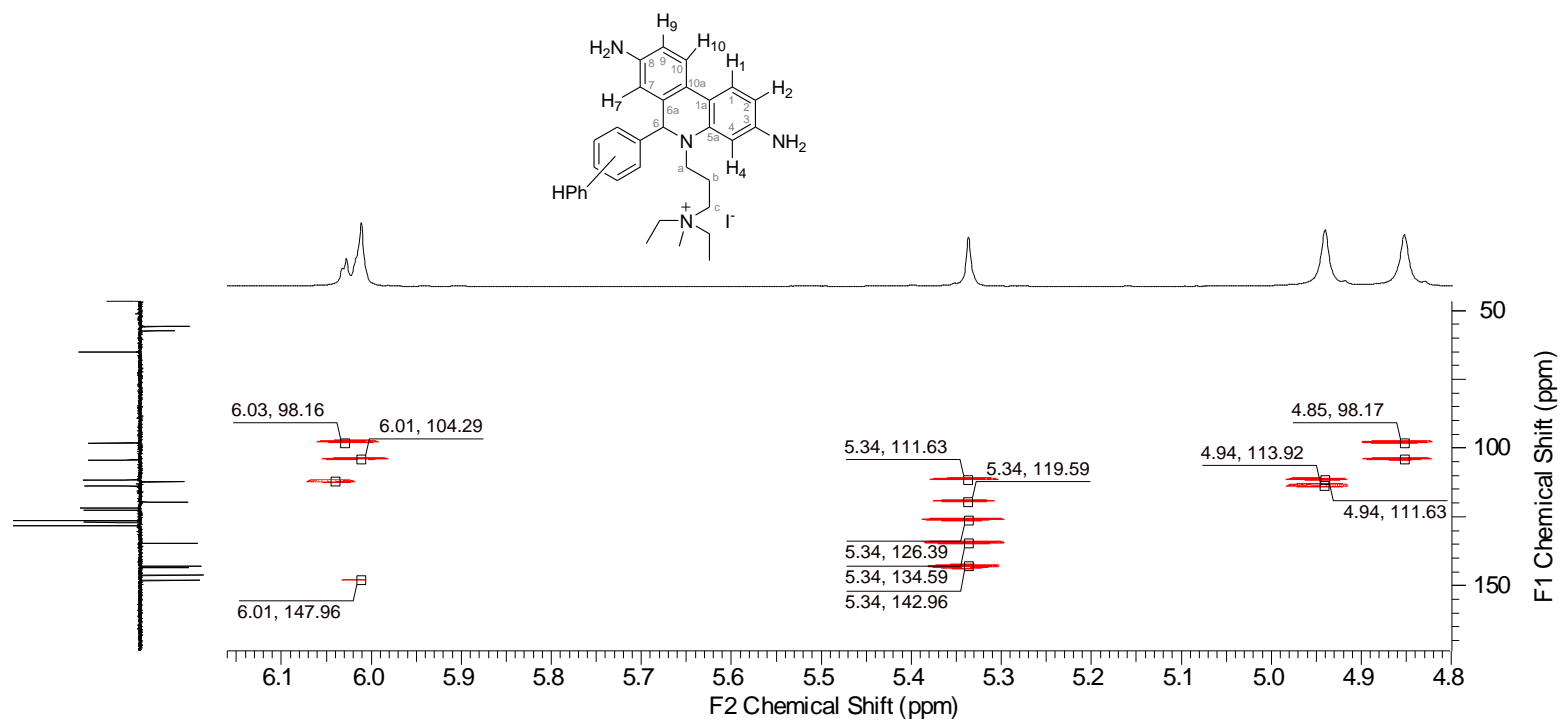

**Supplementary Figure 1d.** <sup>1</sup>H-<sup>13</sup>C HMBC NMR spectrum of hydropropidine (HPr<sup>+</sup>) in DMSO-*d*<sub>6</sub> (zoomed).

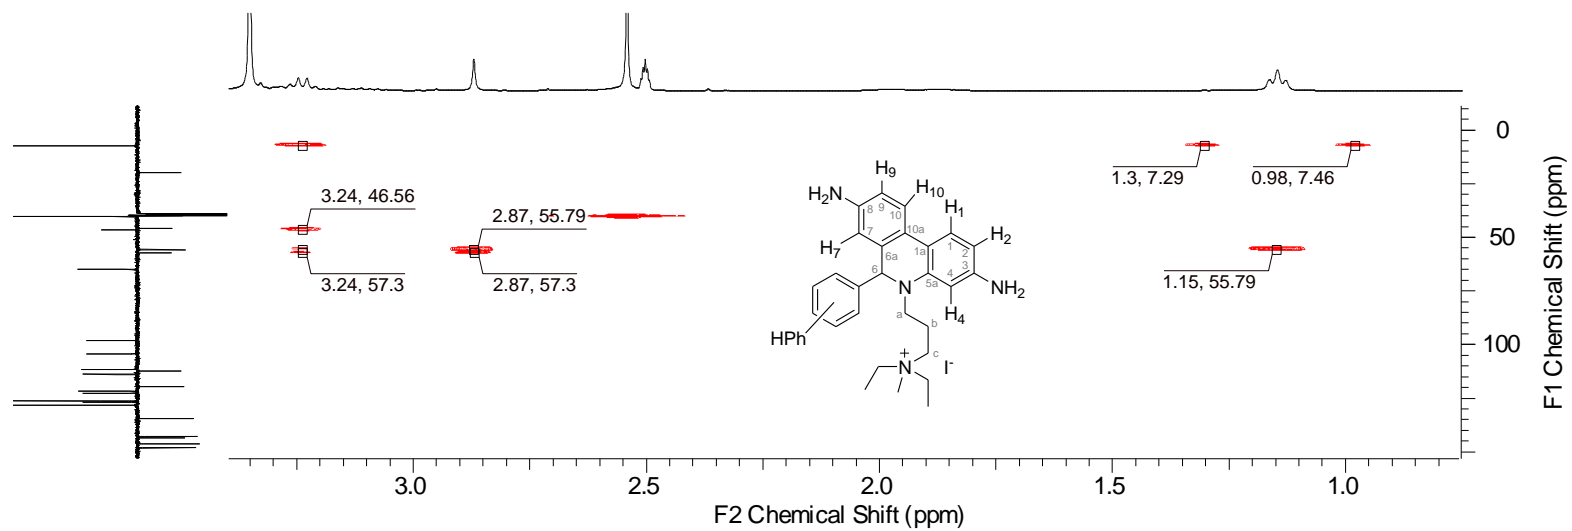

**Supplementary Figure 1d.**  $^1\text{H}$ - $^{13}\text{C}$  HMBC NMR spectrum of hydropropidine ( $\text{HPr}^+$ ) in  $\text{DMSO-}d_6$  (zoomed).



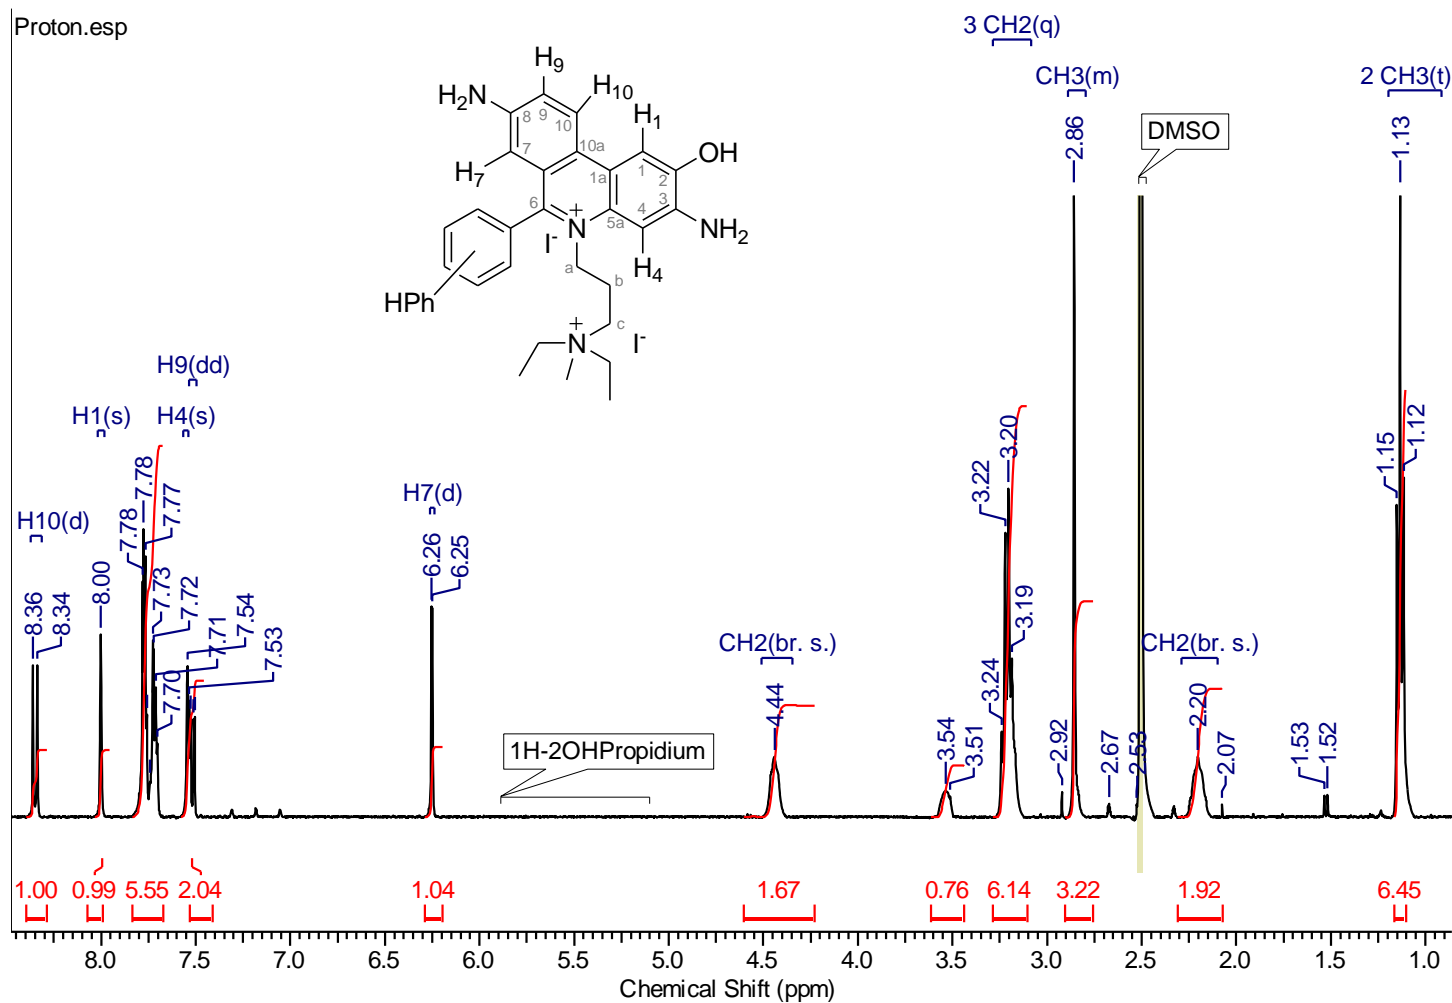

Supplementary Figure 2a. <sup>1</sup>H NMR spectrum of 2-hydroxypropidium (2-OH-Pr<sup>+</sup>) in DMSO-*d*<sub>6</sub>.

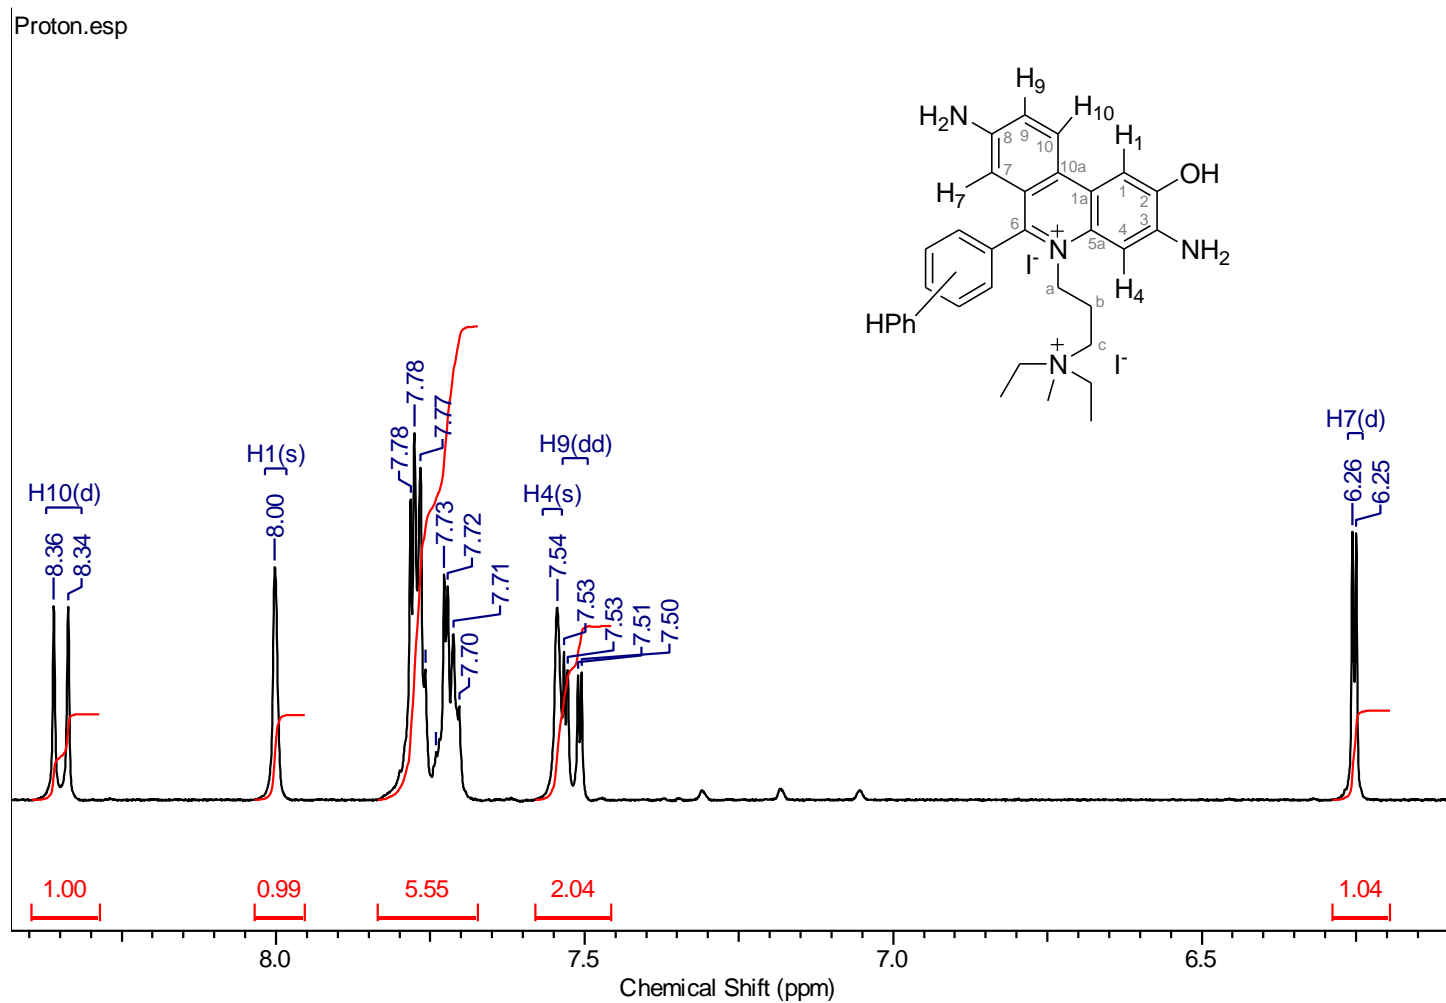

**Supplementary Figure 2a.** <sup>1</sup>H NMR spectrum of 2-hydroxypropidium (2-OH-Pr<sup>++</sup>) in DMSO-*d*<sub>6</sub> (zoomed region 5.3 – 8.4 ppm).

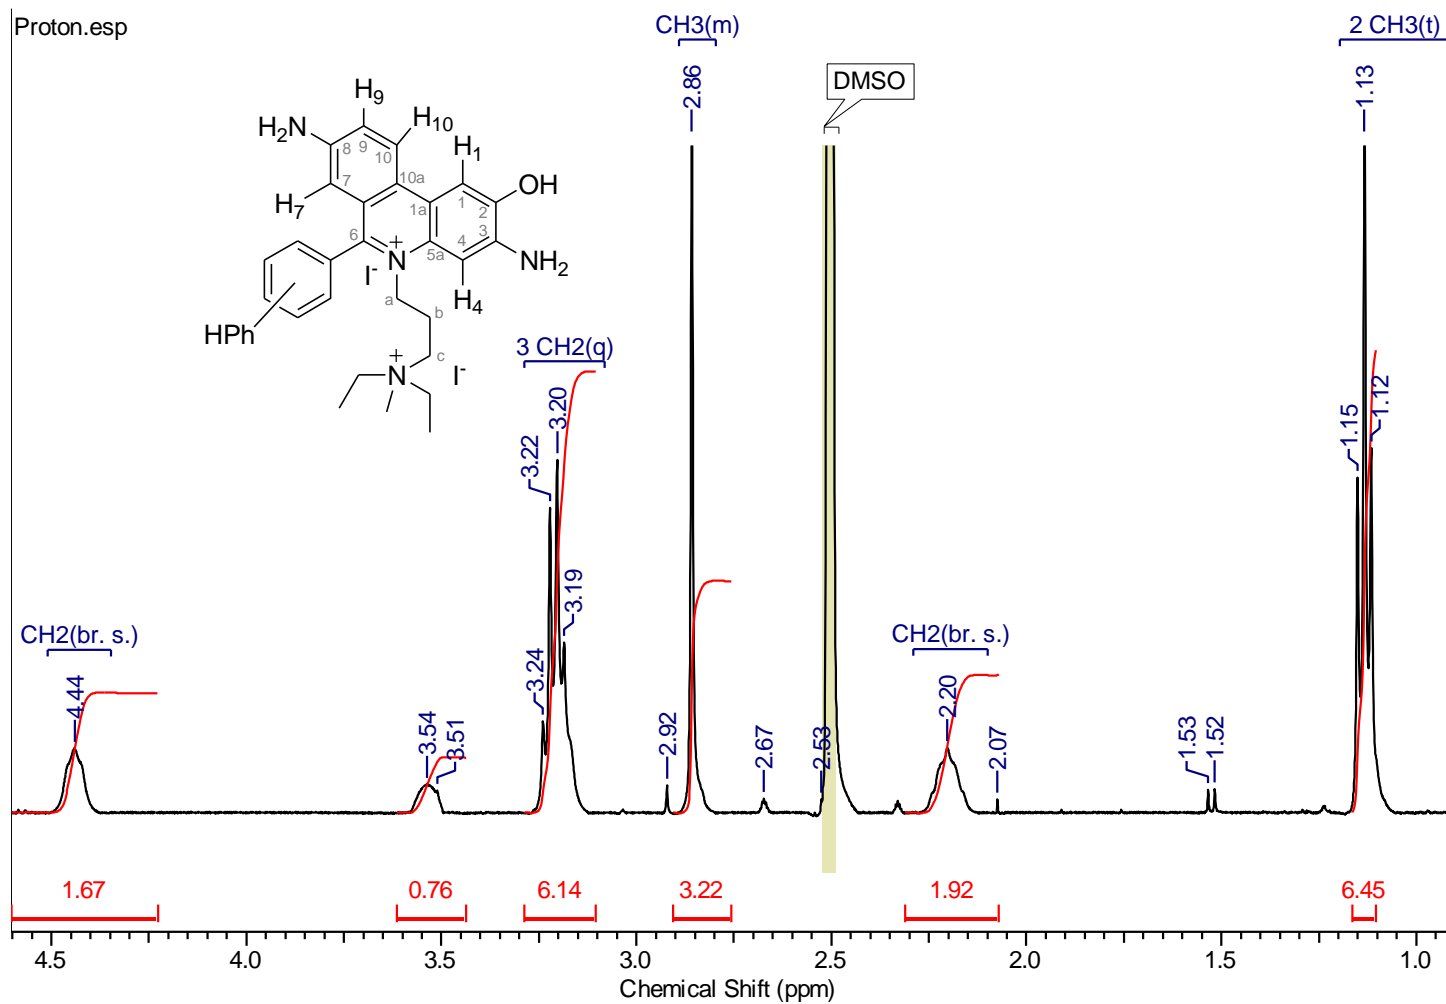

**Supplementary Figure 2a.** <sup>1</sup>H NMR spectrum of 2-hydroxypropidium (2-OH-Pr<sup>++</sup>) in DMSO-*d*<sub>6</sub> (zoomed region 0.9 – 4.6 ppm).

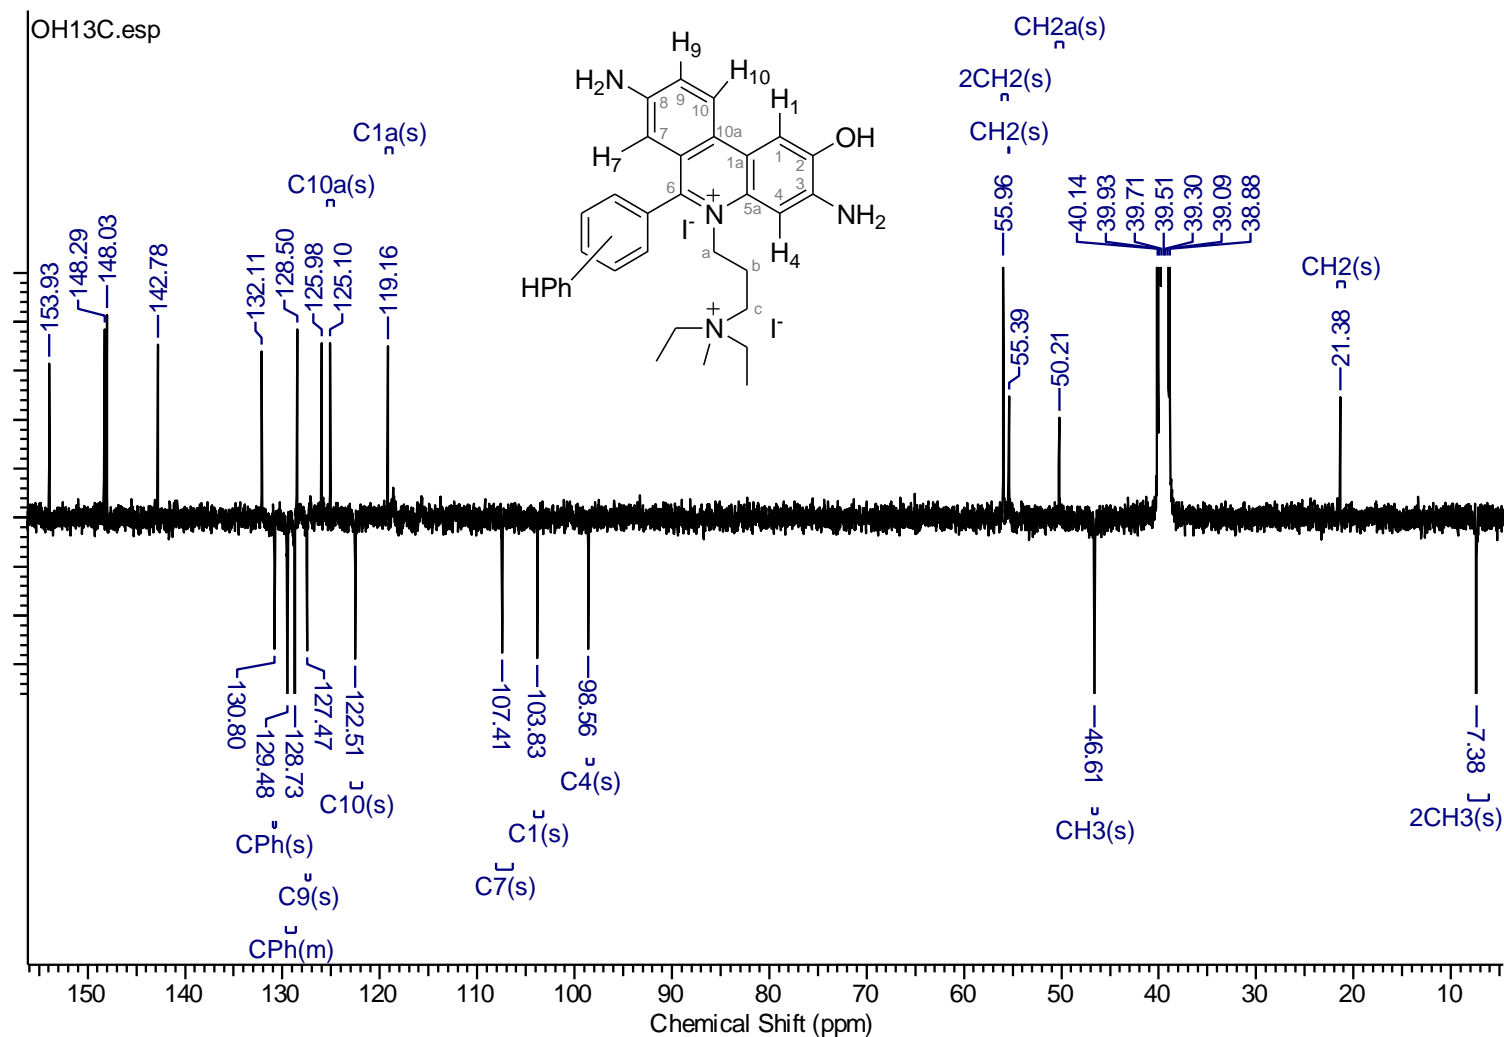

Supplementary Figure 2b.  $^{13}\text{C}$  APT NMR spectrum of 2-hydroxypropidium (2-OH-Pr $^{++}$ ) in DMSO- $d_6$ .

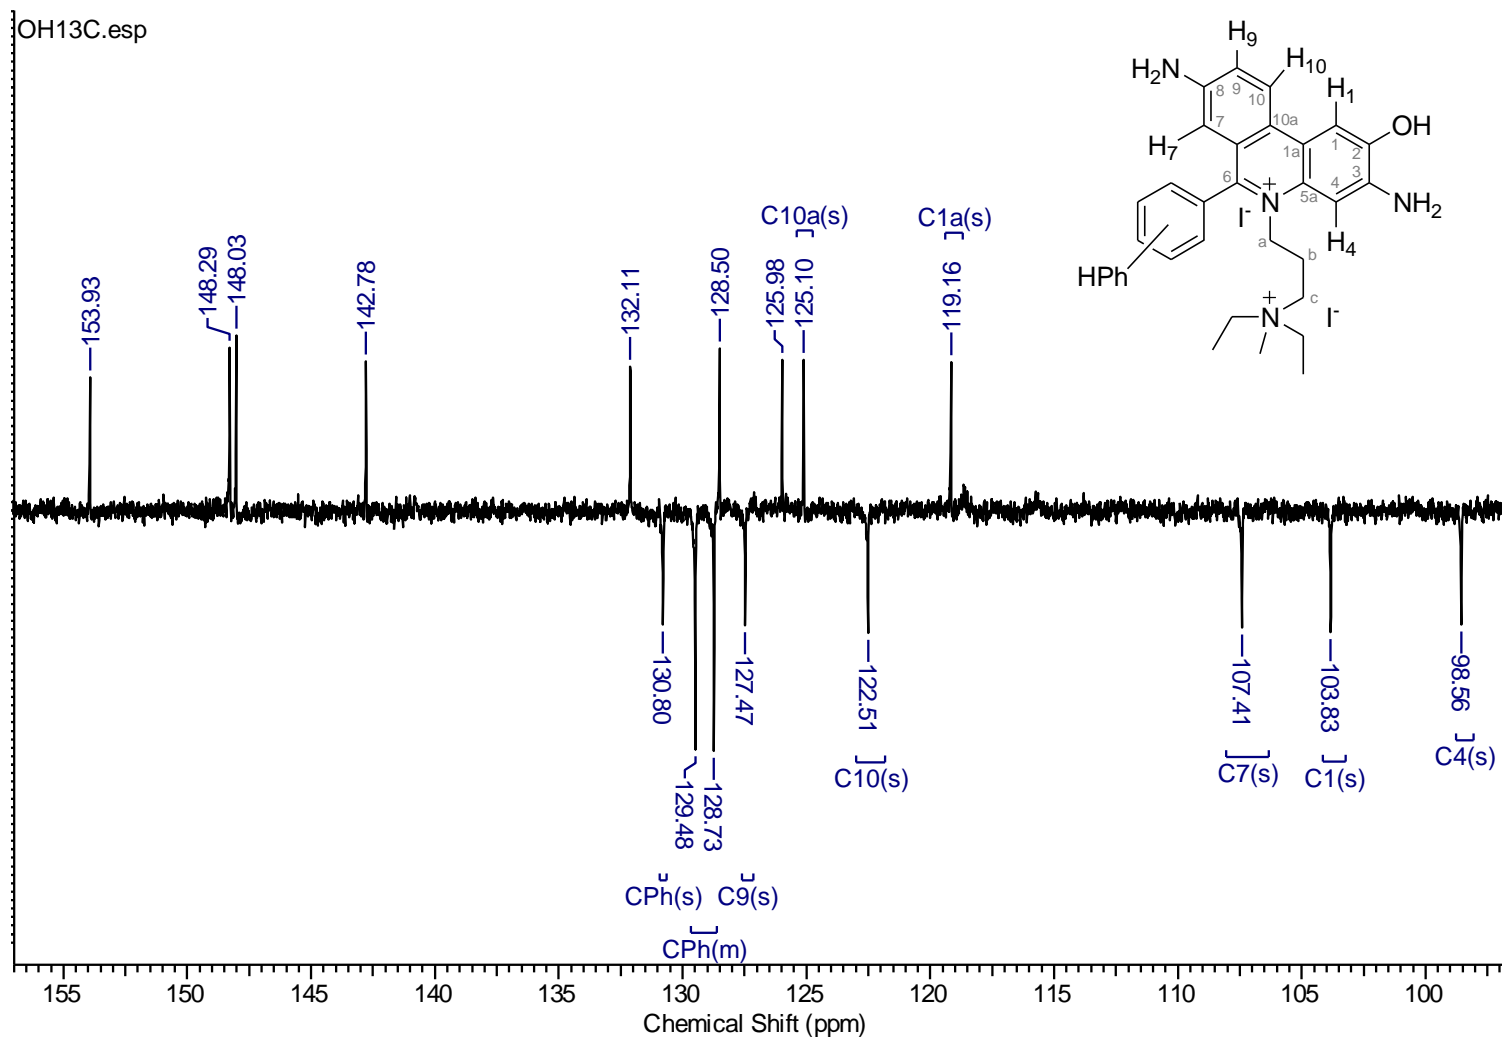

**Supplementary Figure 2b.**  $^{13}\text{C}$  APT NMR spectrum of 2-hydroxypropidium (2-OH-Pr $^{++}$ ) in DMSO- $d_6$  (zoomed region 95 – 156 ppm).

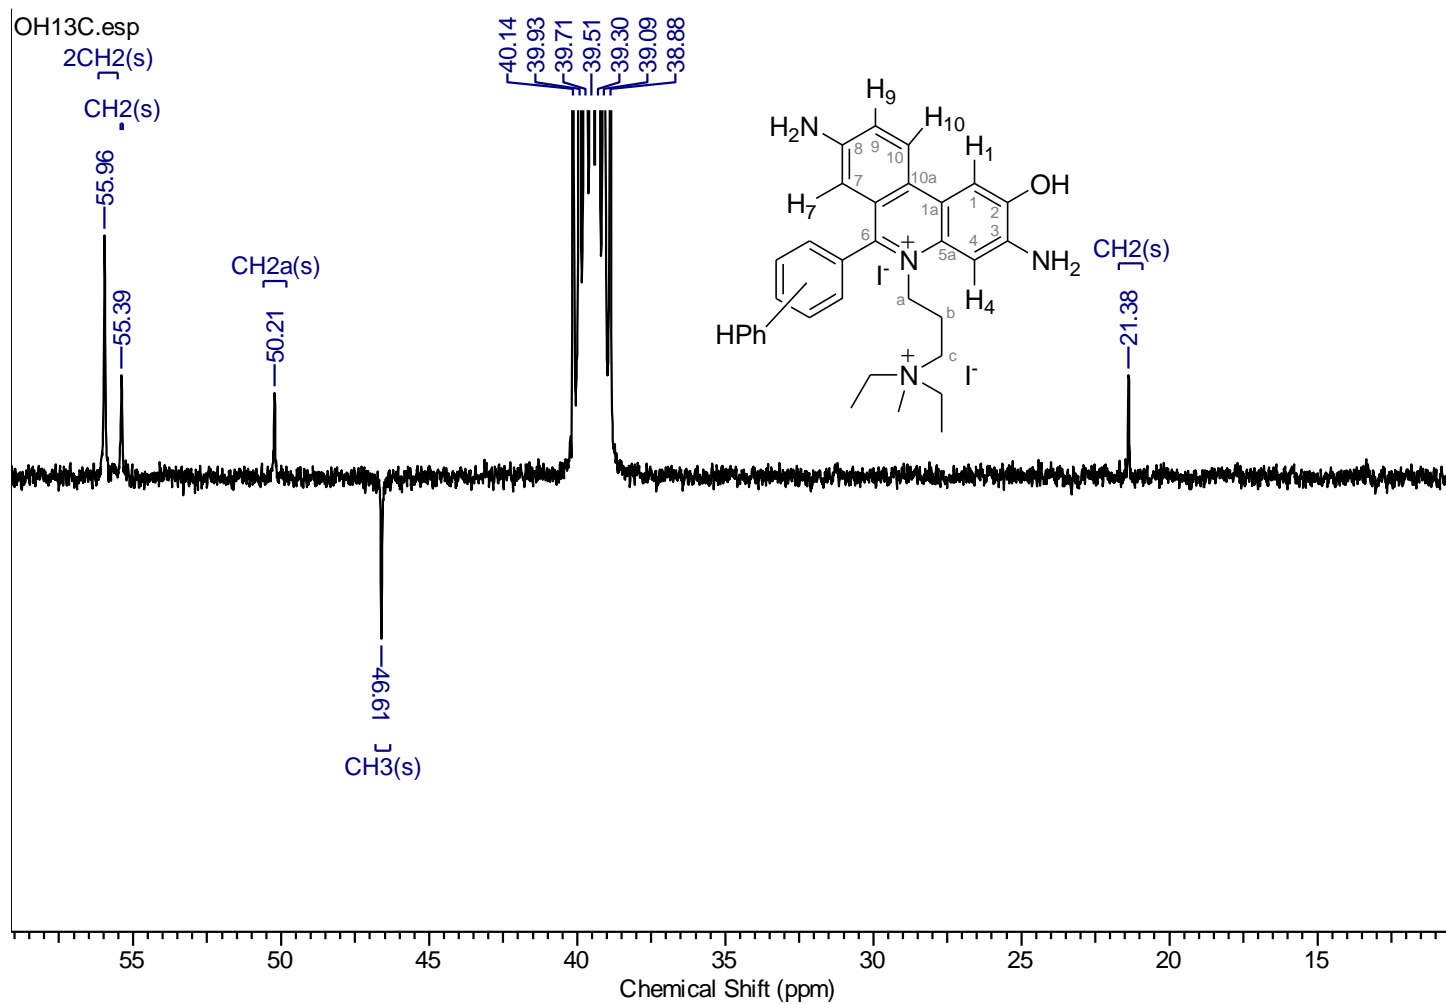

**Supplementary Figure 2b.**  $^{13}\text{C}$  APT NMR spectrum of 2-hydroxypropidium (2-OH-Pr<sup>++</sup>) in DMSO-*d*<sub>6</sub> (zoomed region 11 – 58 ppm).

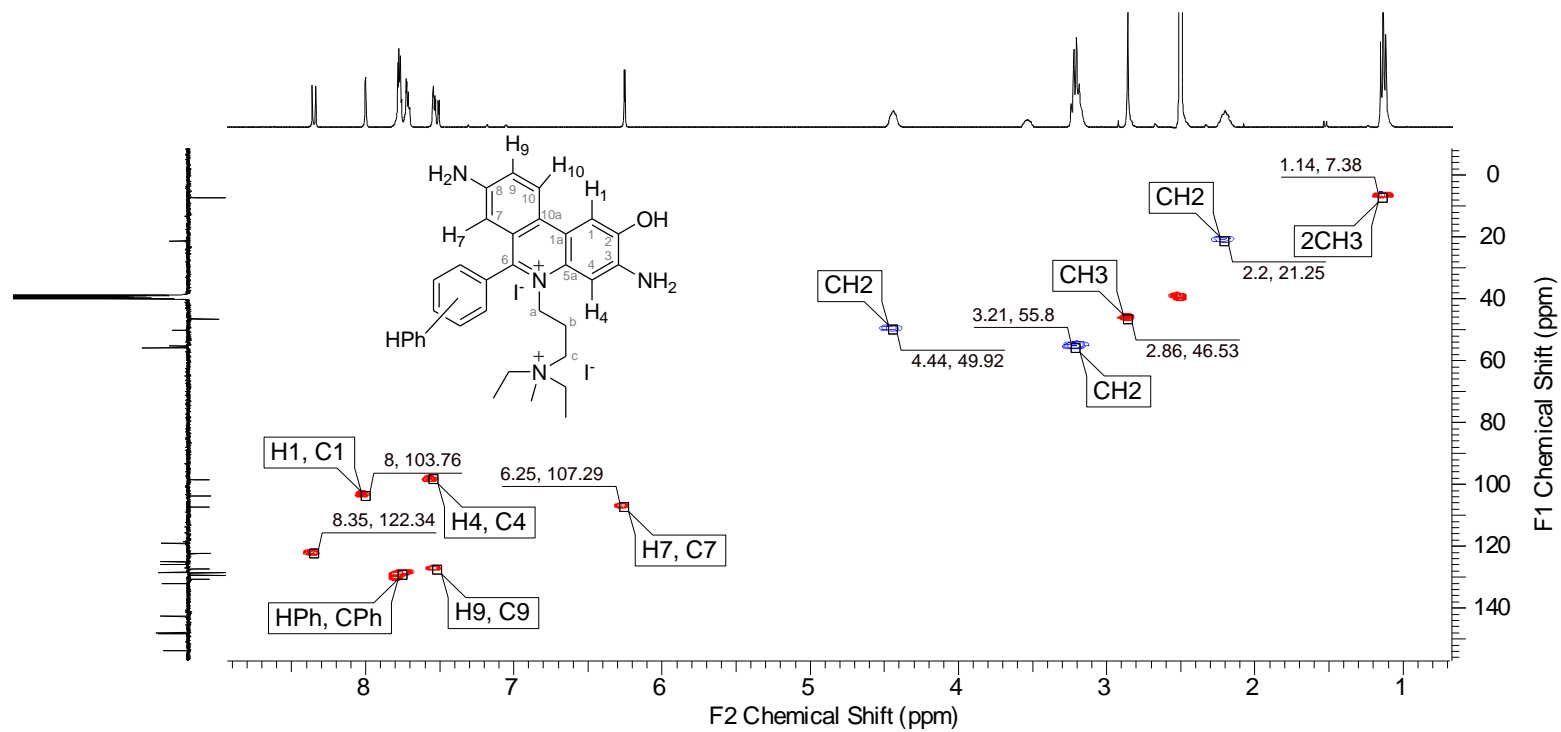

Supplementary Figure 2c. <sup>1</sup>H-<sup>13</sup>C HSQC NMR spectrum of 2-hydroxypropidium (2-OH-Pr<sup>++</sup>) in DMSO-*d*<sub>6</sub>.

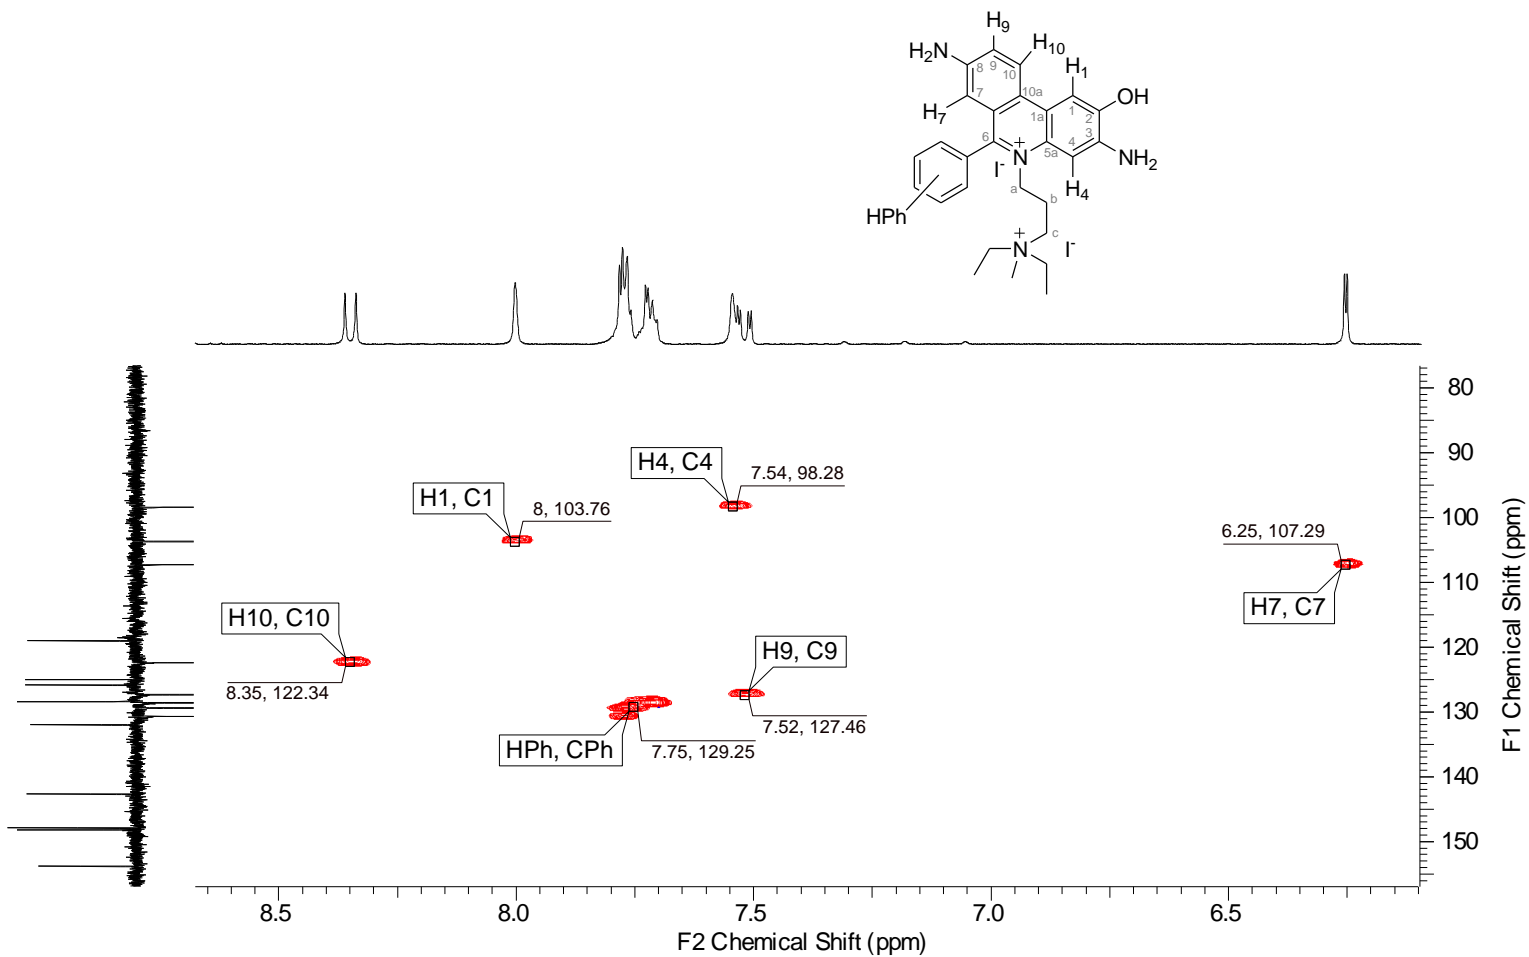

**Supplementary Figure 2c.** <sup>1</sup>H-<sup>13</sup>C HSQC NMR spectrum of 2-hydroxypropidium (2-OH-Pr<sup>+</sup>) in DMSO-*d*<sub>6</sub> (zoomed).



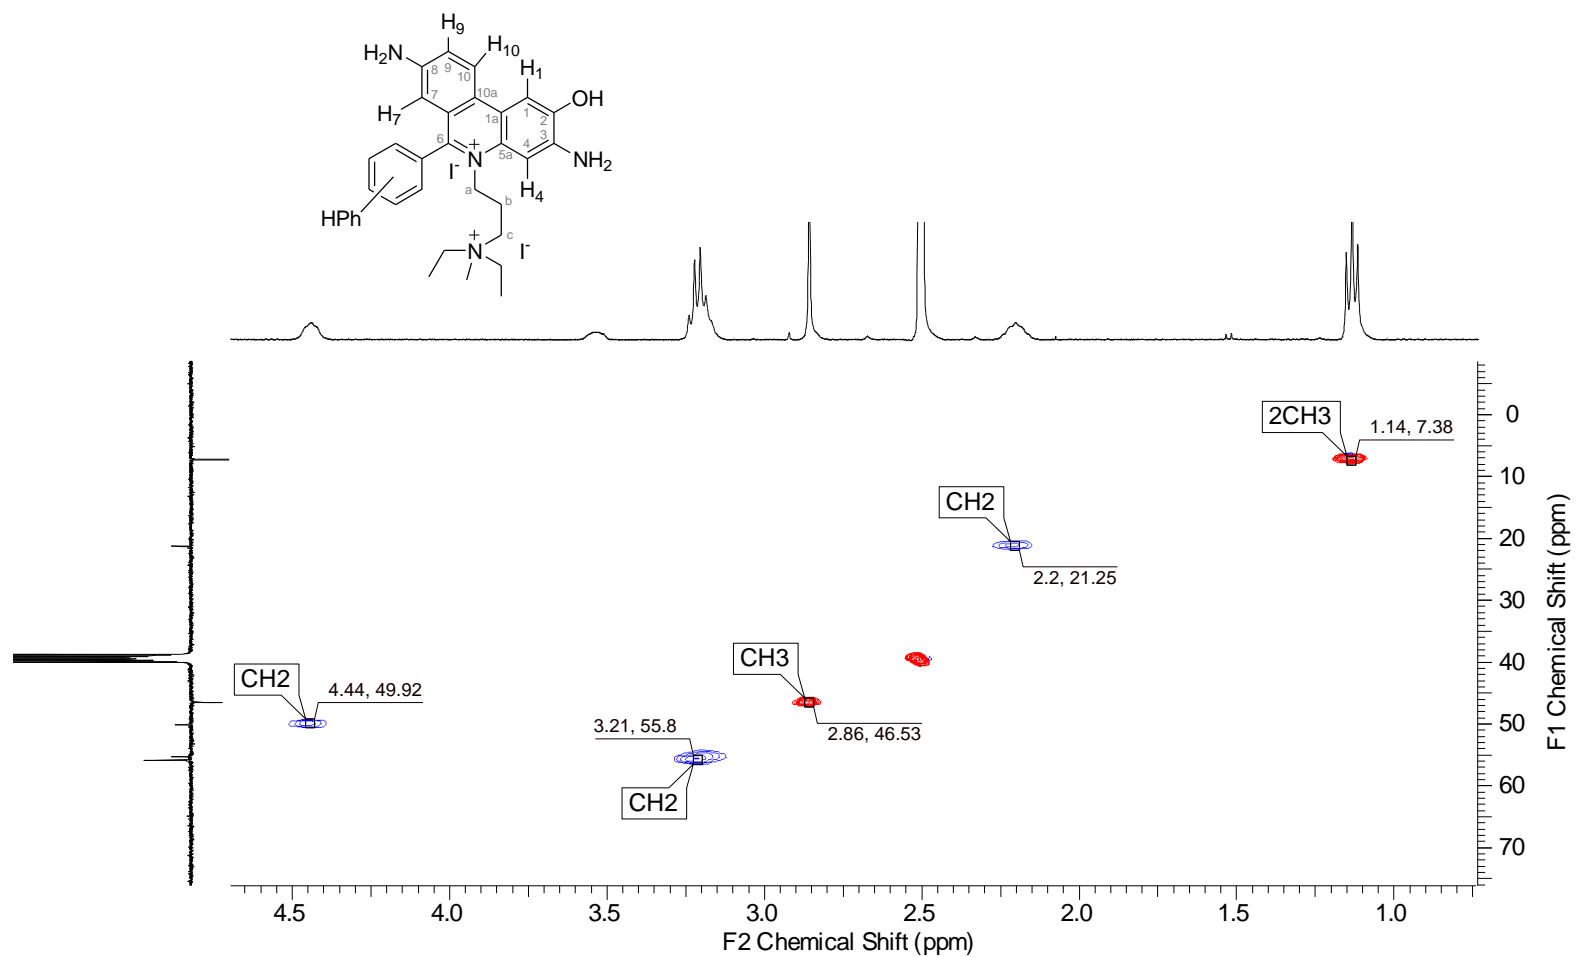

**Supplementary Figure 2c.** <sup>1</sup>H-<sup>13</sup>C HSQC NMR spectrum of 2-hydroxypropidium (2-OH-Pr<sup>+</sup>) in DMSO-*d*<sub>6</sub> (zoomed).

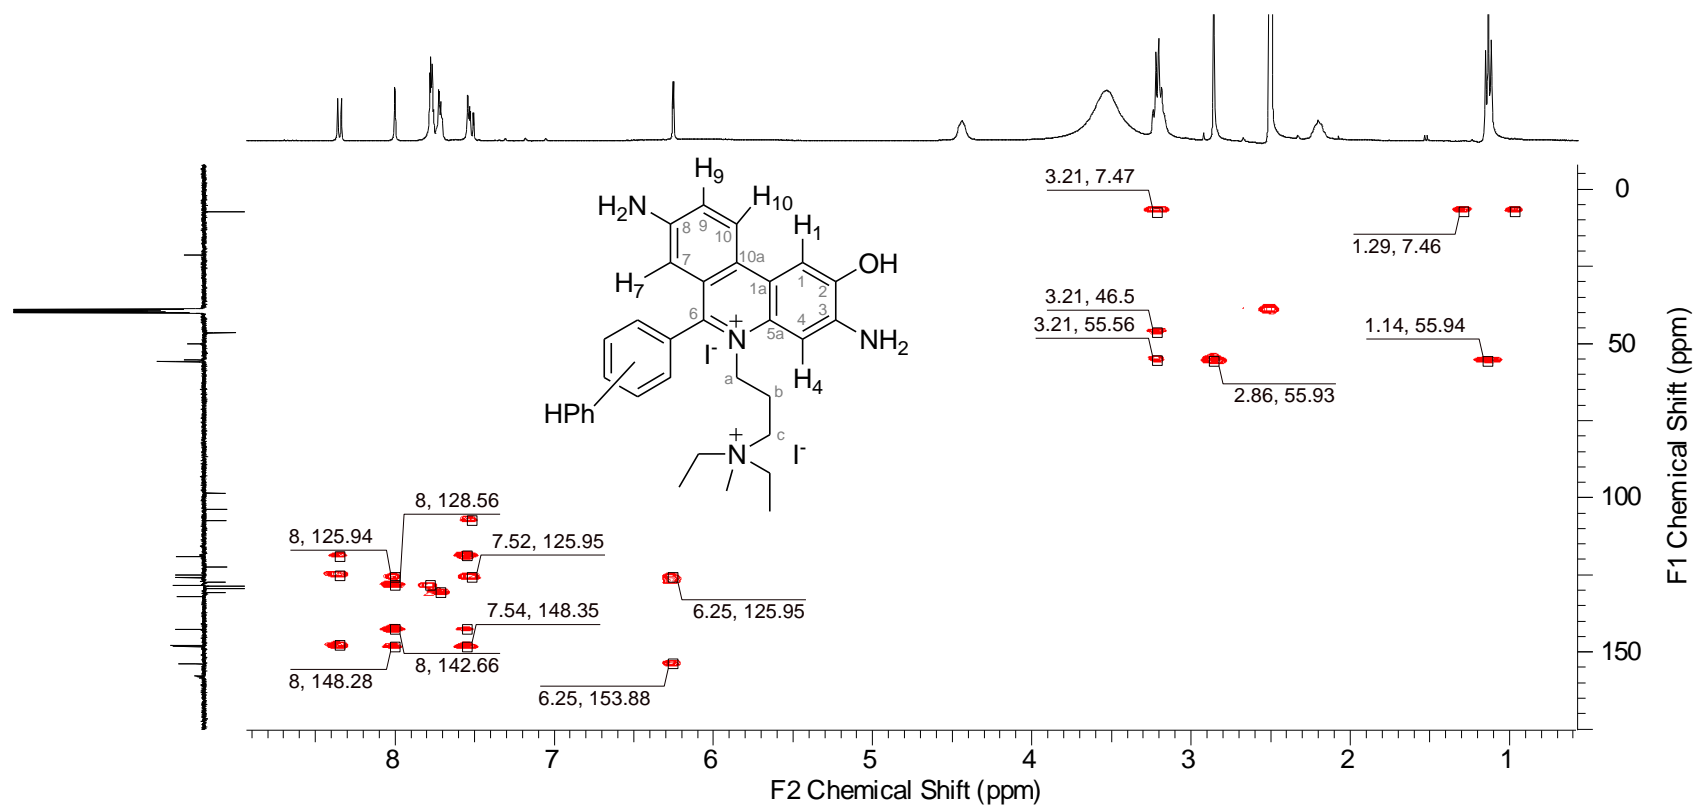

Supplementary Figure 2d. <sup>1</sup>H-<sup>13</sup>C HMBC NMR spectrum of 2-hydroxypropidium (2-OH-Pr<sup>++</sup>) in DMSO-*d*<sub>6</sub>.

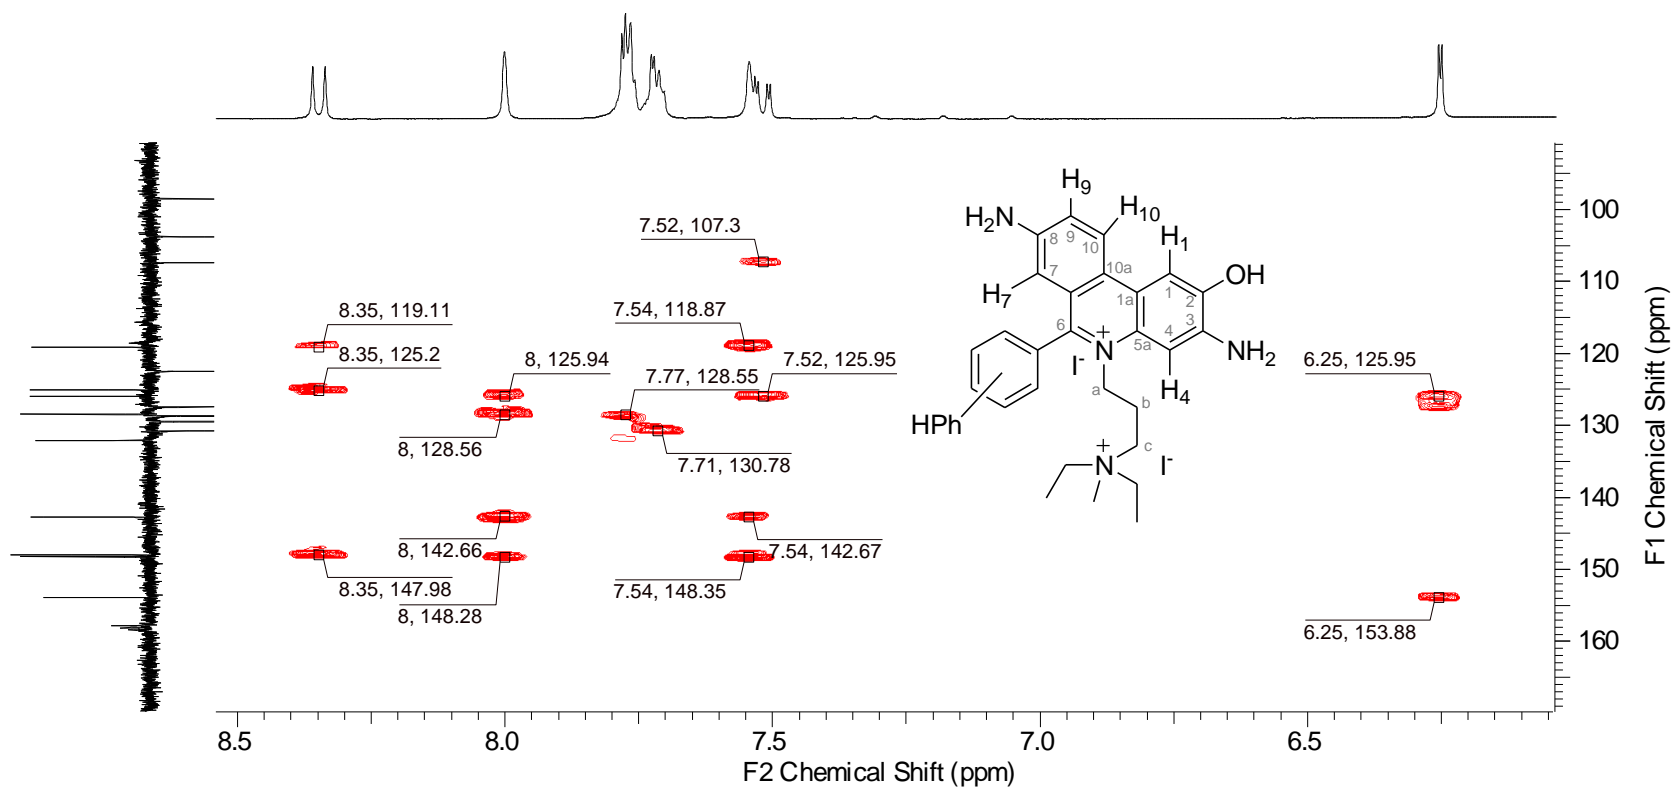

Supplementary Figure 2d.  $^1\text{H}$ - $^{13}\text{C}$  HMBC NMR spectrum of 2-hydroxypropidium (2-OH-Pr $^{++}$ ) in DMSO- $d_6$  (zoomed).

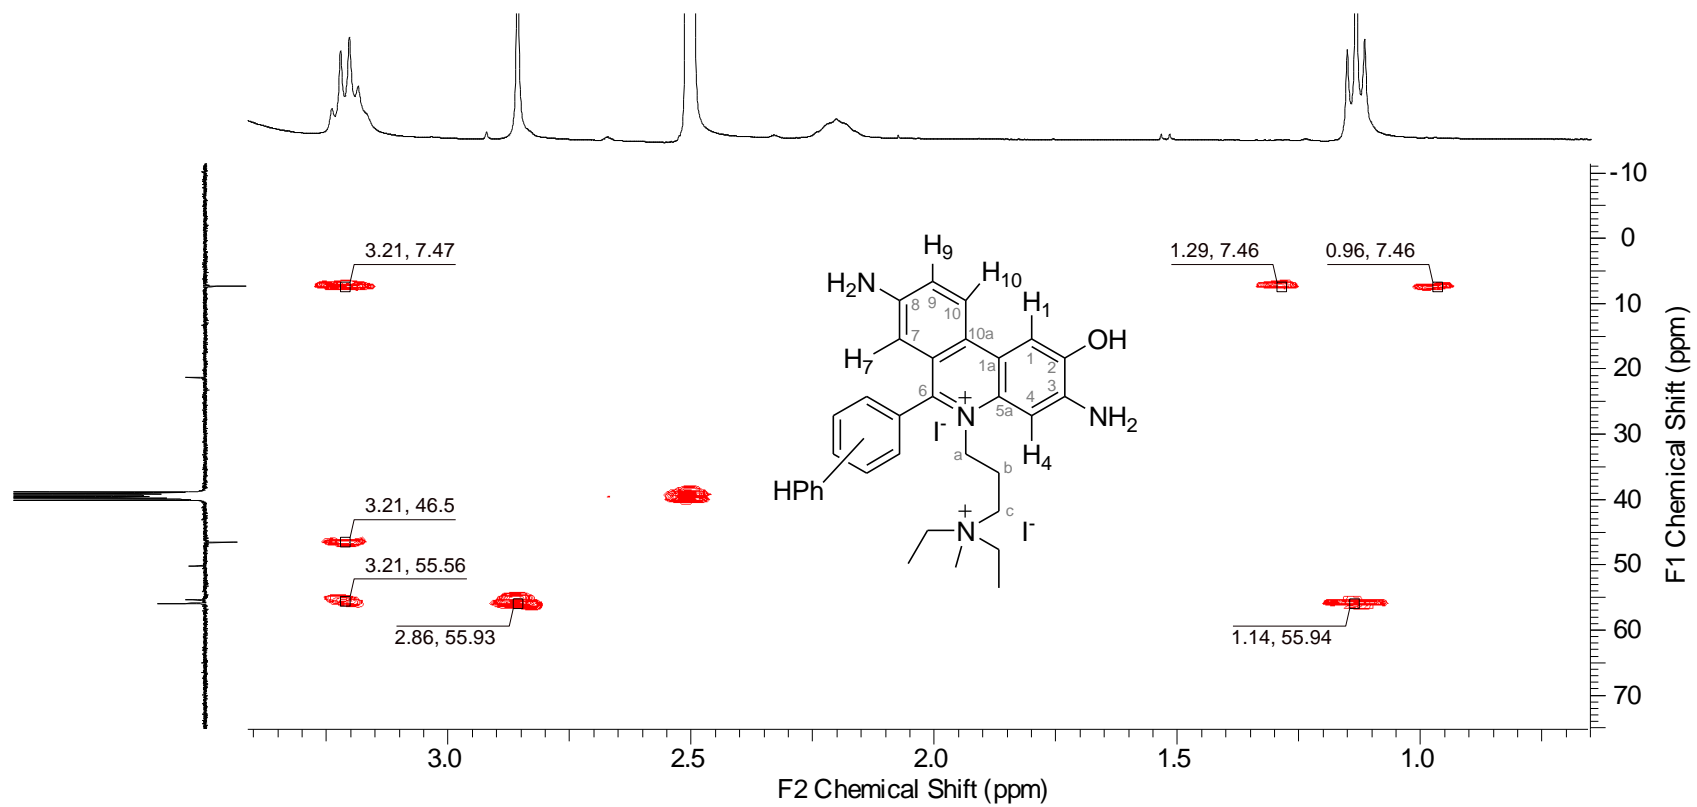

Supplementary Figure 2d.  $^1\text{H}$ - $^{13}\text{C}$  HMBC NMR spectrum of 2-hydroxypropidium (2-OH-Pr $^{++}$ ) in DMSO- $d_6$  (zoomed).

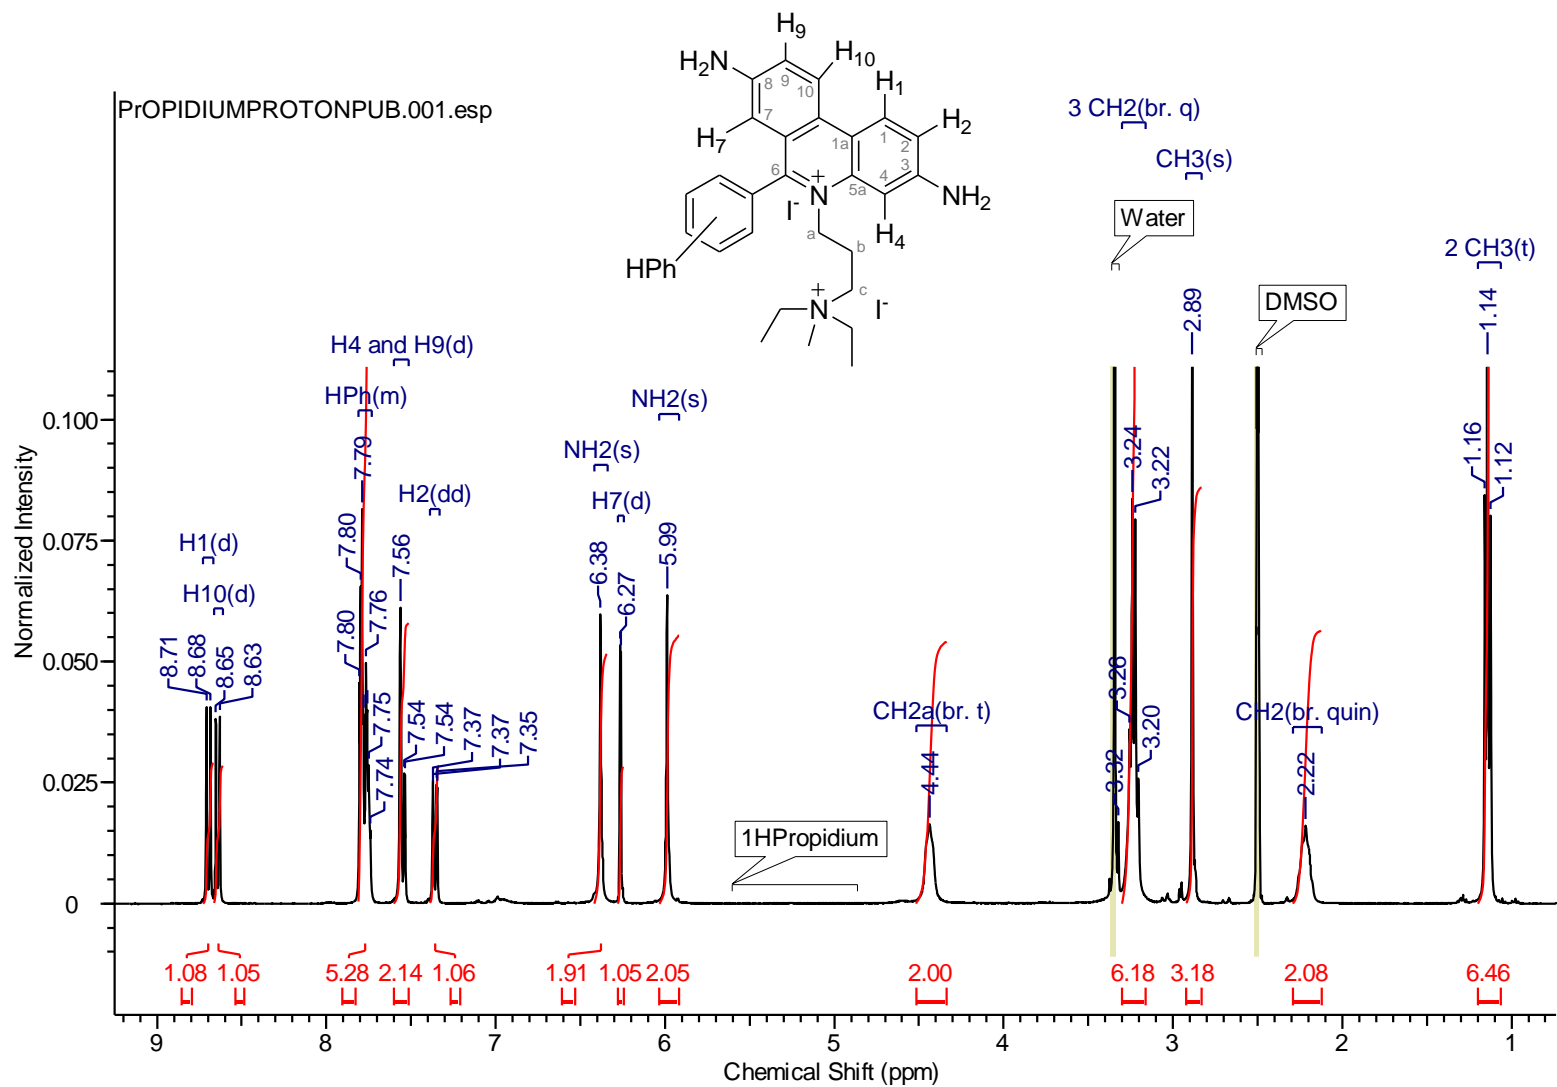

Supplementary Figure 3a. <sup>1</sup>H NMR spectrum of propidium (Pr<sup>+</sup>) in DMSO-*d*<sub>6</sub>.

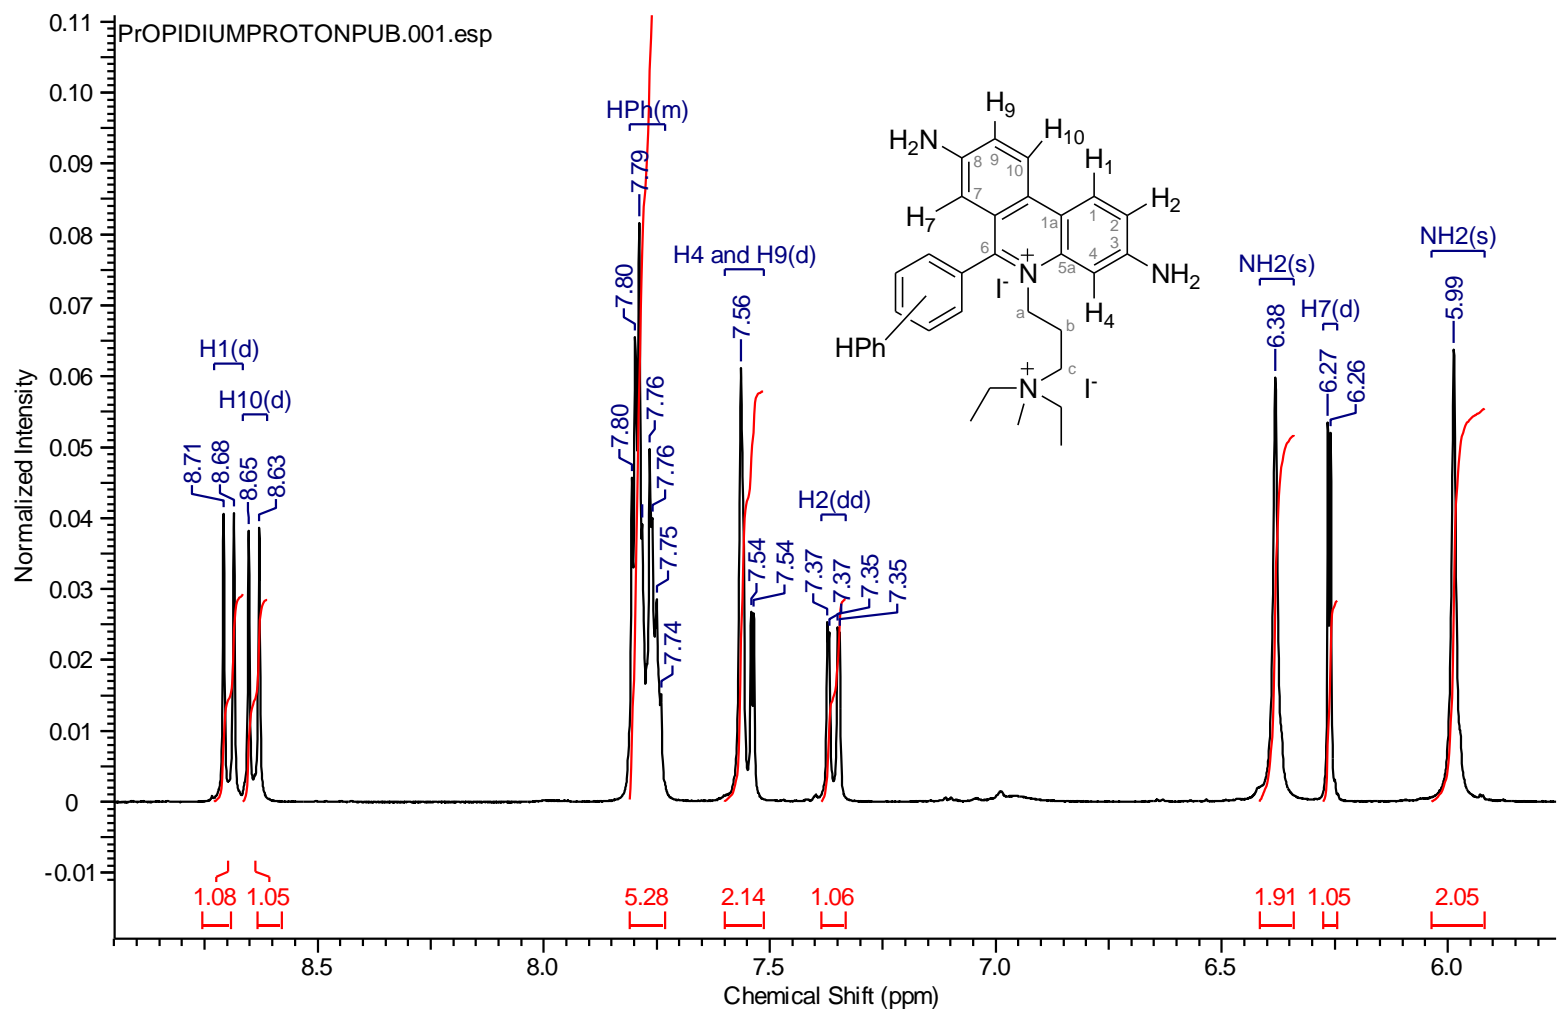

**Supplementary Figure 3a.**  $^1\text{H}$  NMR spectrum of propidium ( $\text{Pr}^{++}$ ) in  $\text{DMSO-}d_6$  (zoomed region 5.8 – 8.8 ppm).

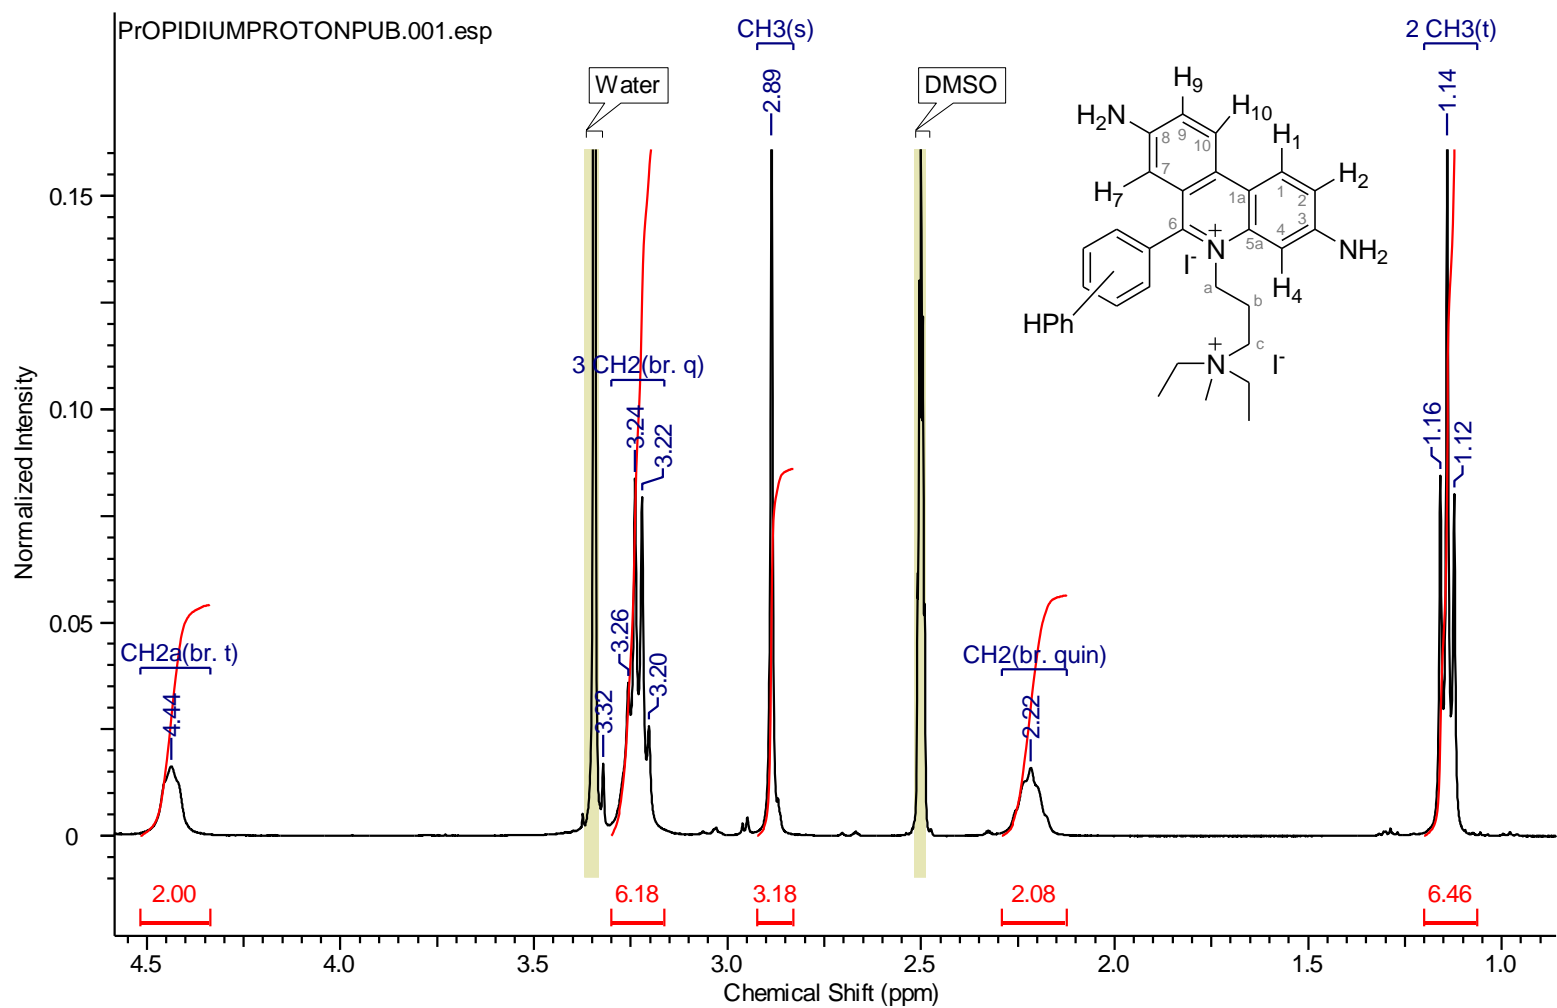

**Supplementary Figure 3a.**  $^1\text{H}$  NMR spectrum of propidium ( $\text{Pr}^{++}$ ) in  $\text{DMSO-}d_6$  (zoomed region 0.9 – 4.5 ppm).

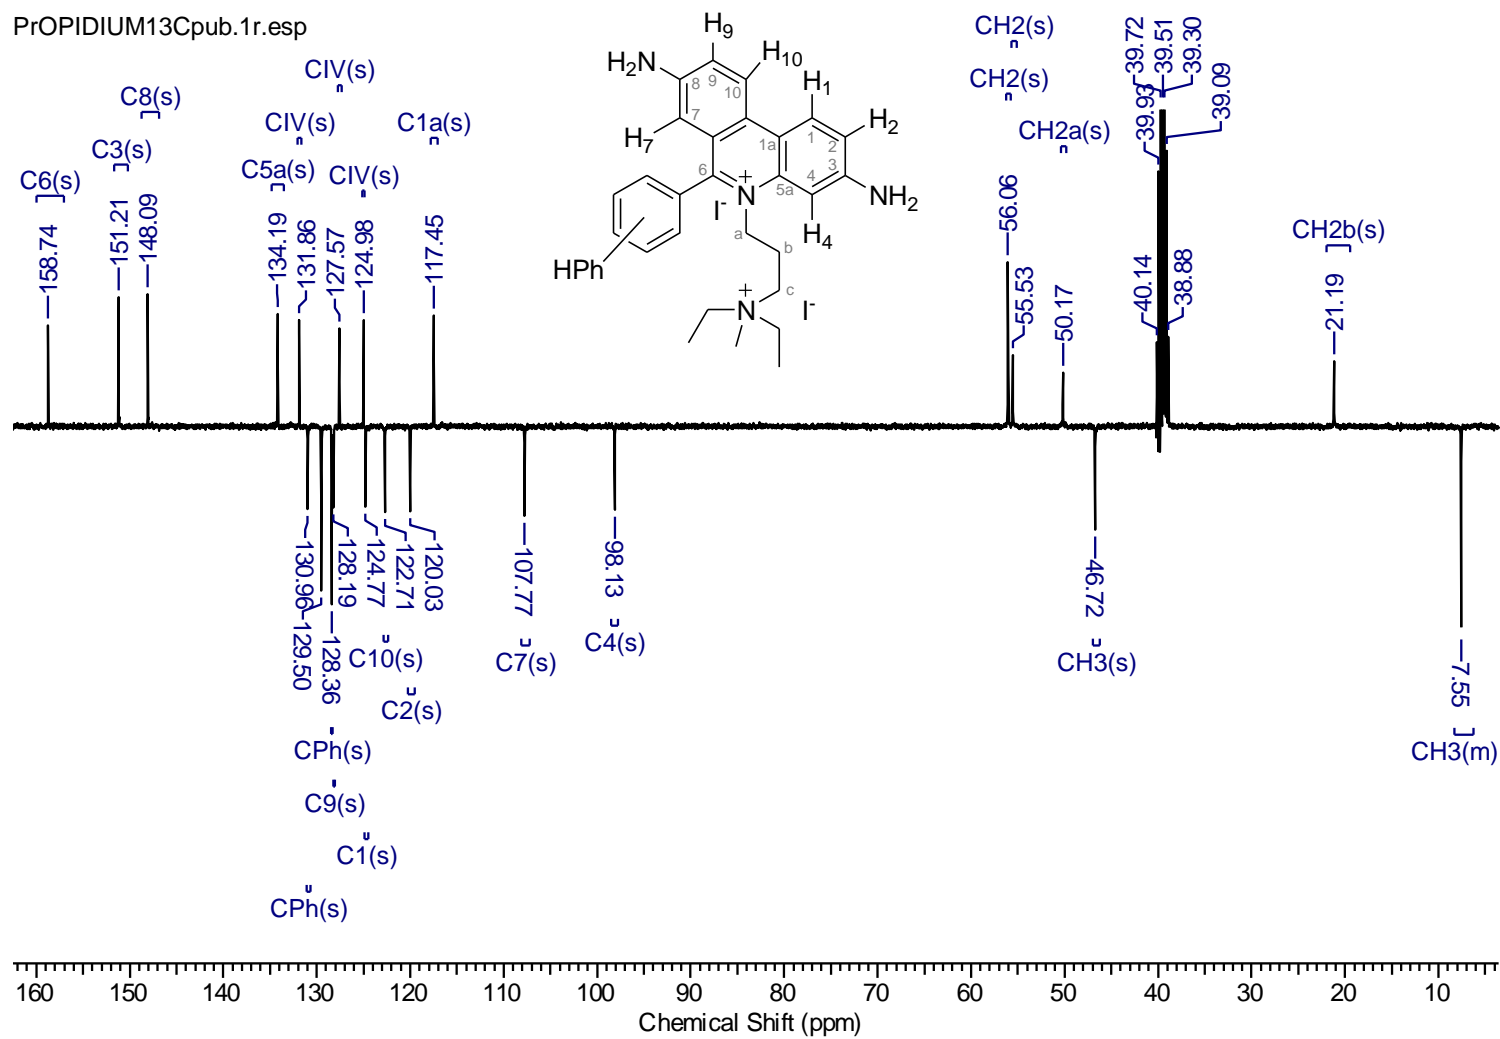

Supplementary Figure 3b. <sup>13</sup>C APT NMR spectrum of propidium (Pr<sup>++</sup>) in DMSO-*d*<sub>6</sub>.



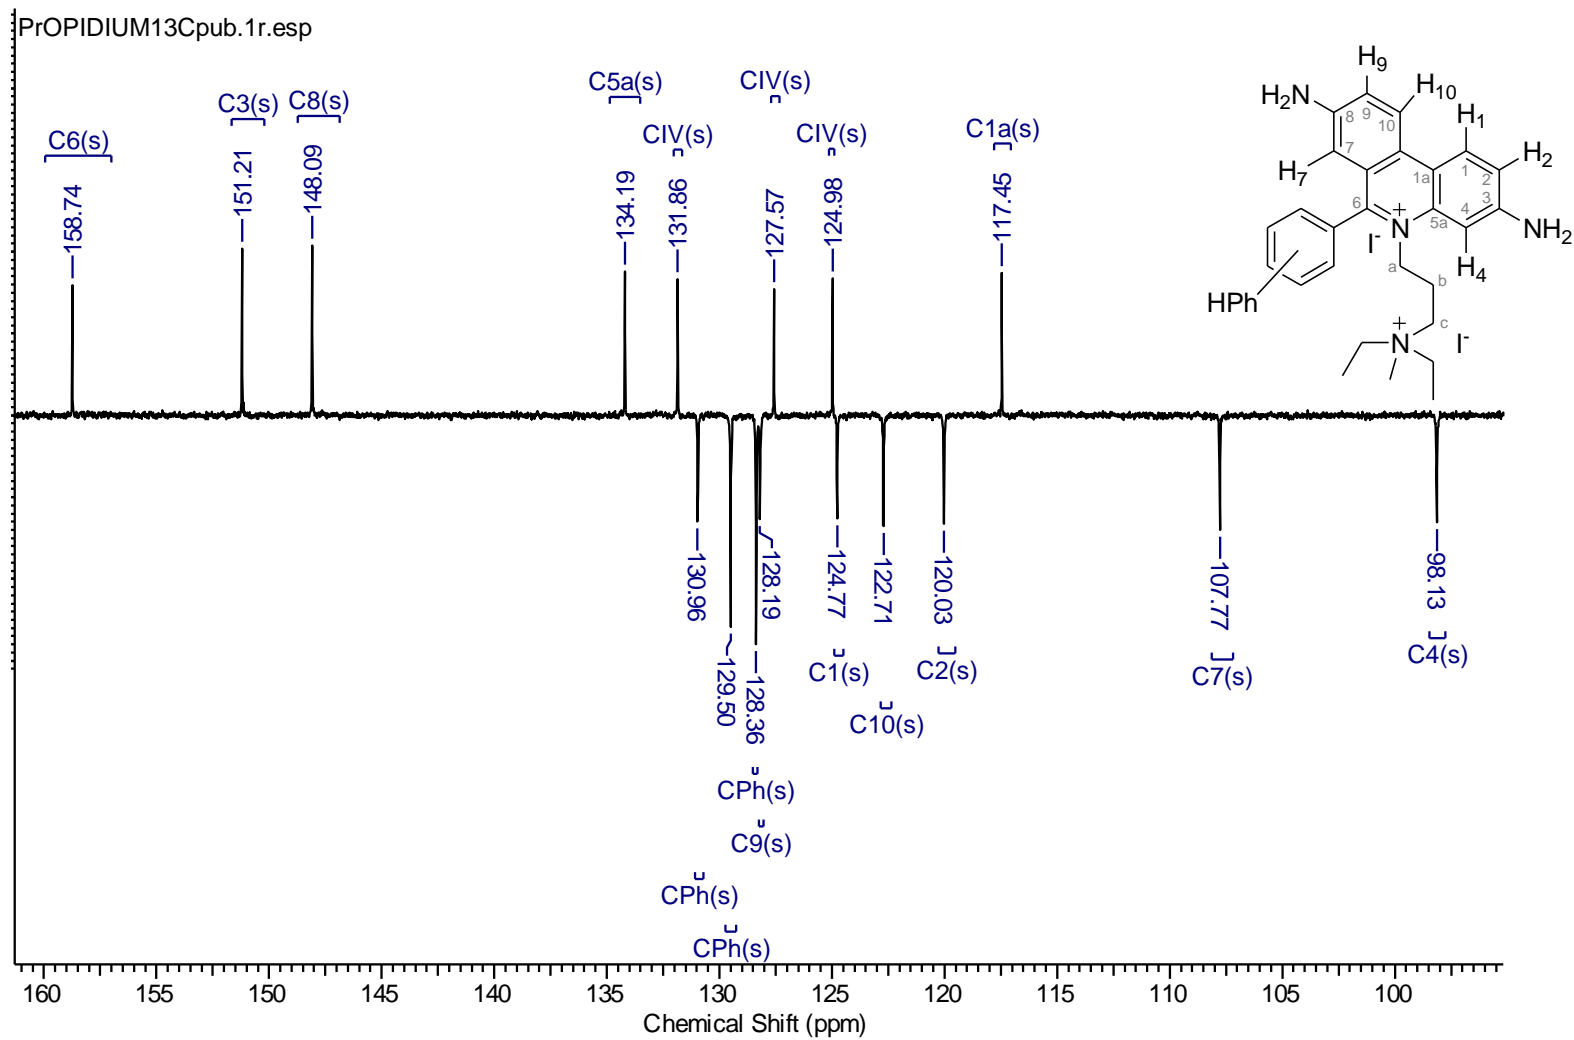

**Supplementary Figure 3b.**  $^{13}\text{C}$  APT NMR spectrum of propidium ( $\text{Pr}^{++}$ ) in  $\text{DMSO-}d_6$  (zoomed region 96 – 161 ppm).

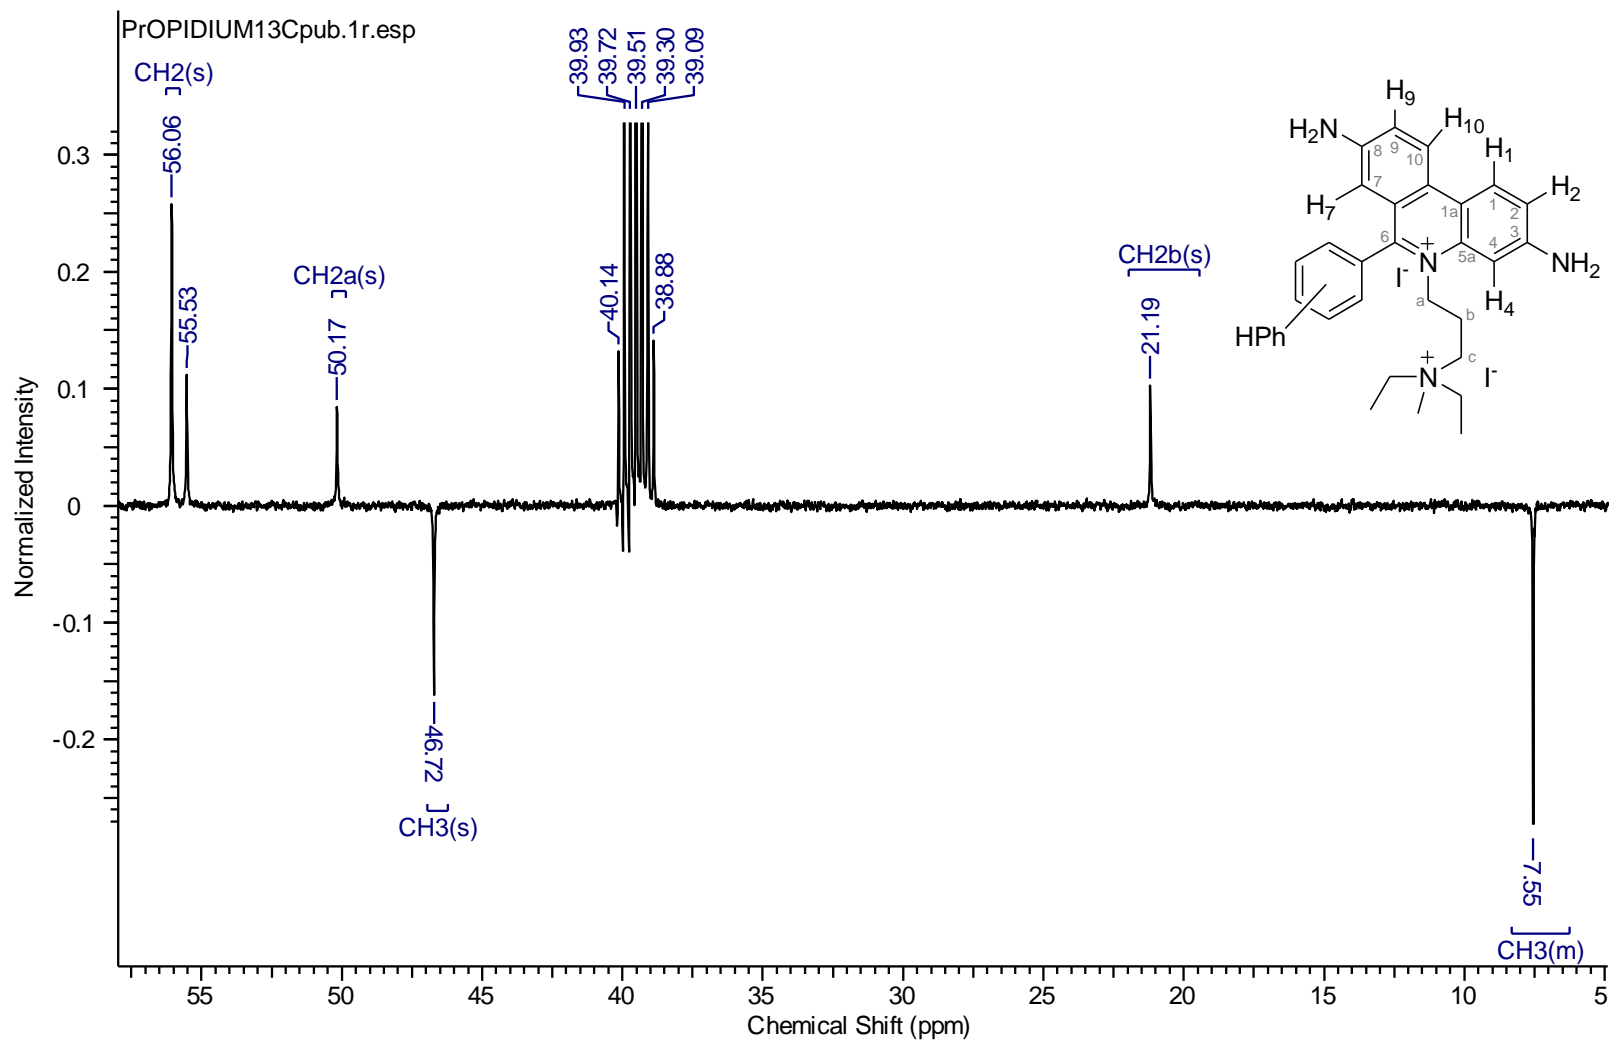

**Supplementary Figure 3b.**  $^{13}\text{C}$  APT NMR spectrum of propidium ( $\text{Pr}^{++}$ ) in  $\text{DMSO-}d_6$  (zoomed region 5 – 57 ppm).

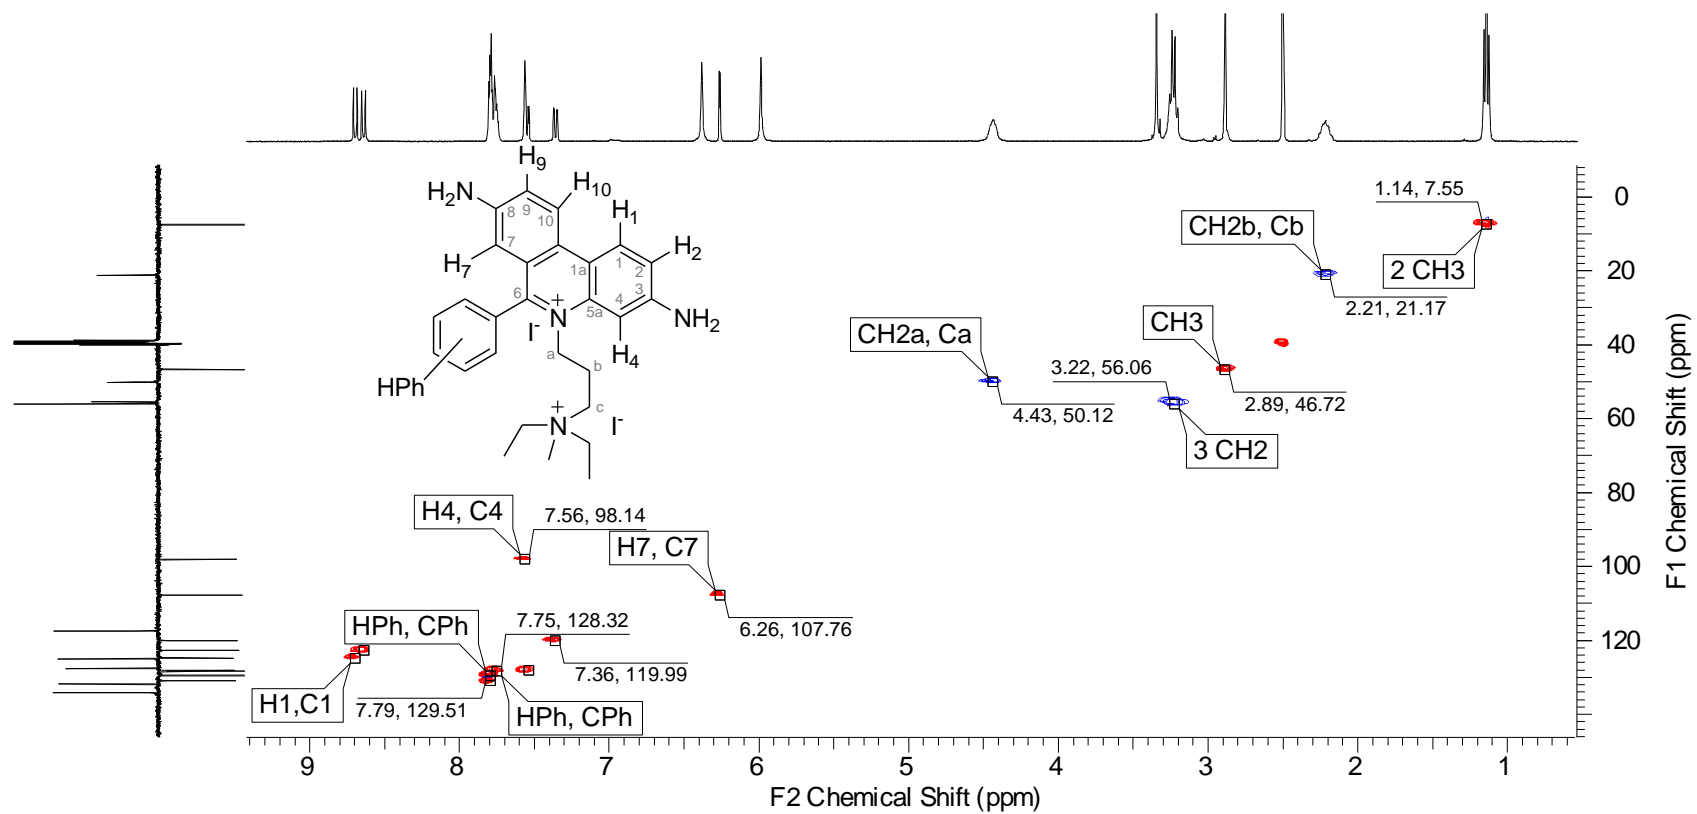

Supplementary Figure 3c.  $^1\text{H}$ - $^{13}\text{C}$  HSQC NMR spectrum of propidium ( $\text{Pr}^{++}$ ) in  $\text{DMSO-}d_6$ .

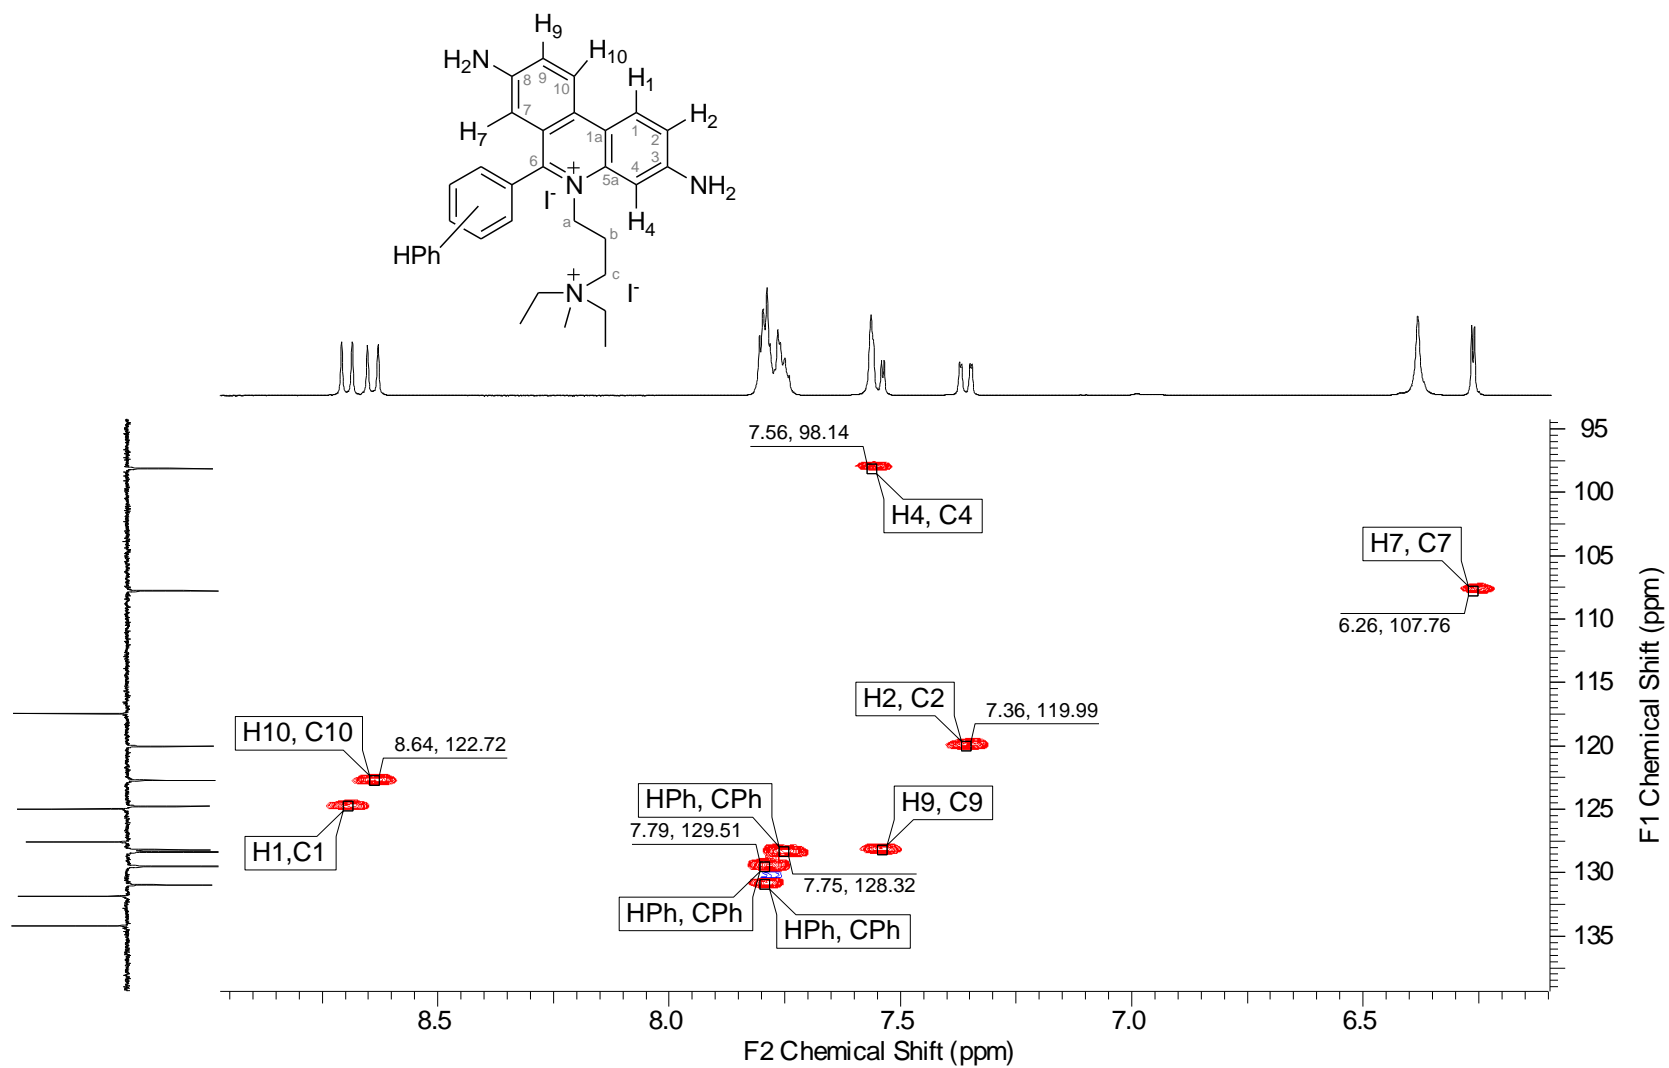

**Supplementary Figure 3c.** <sup>1</sup>H-<sup>13</sup>C HSQC NMR spectrum of propidium (Pr<sup>++</sup>) in DMSO-*d*<sub>6</sub> (zoomed).

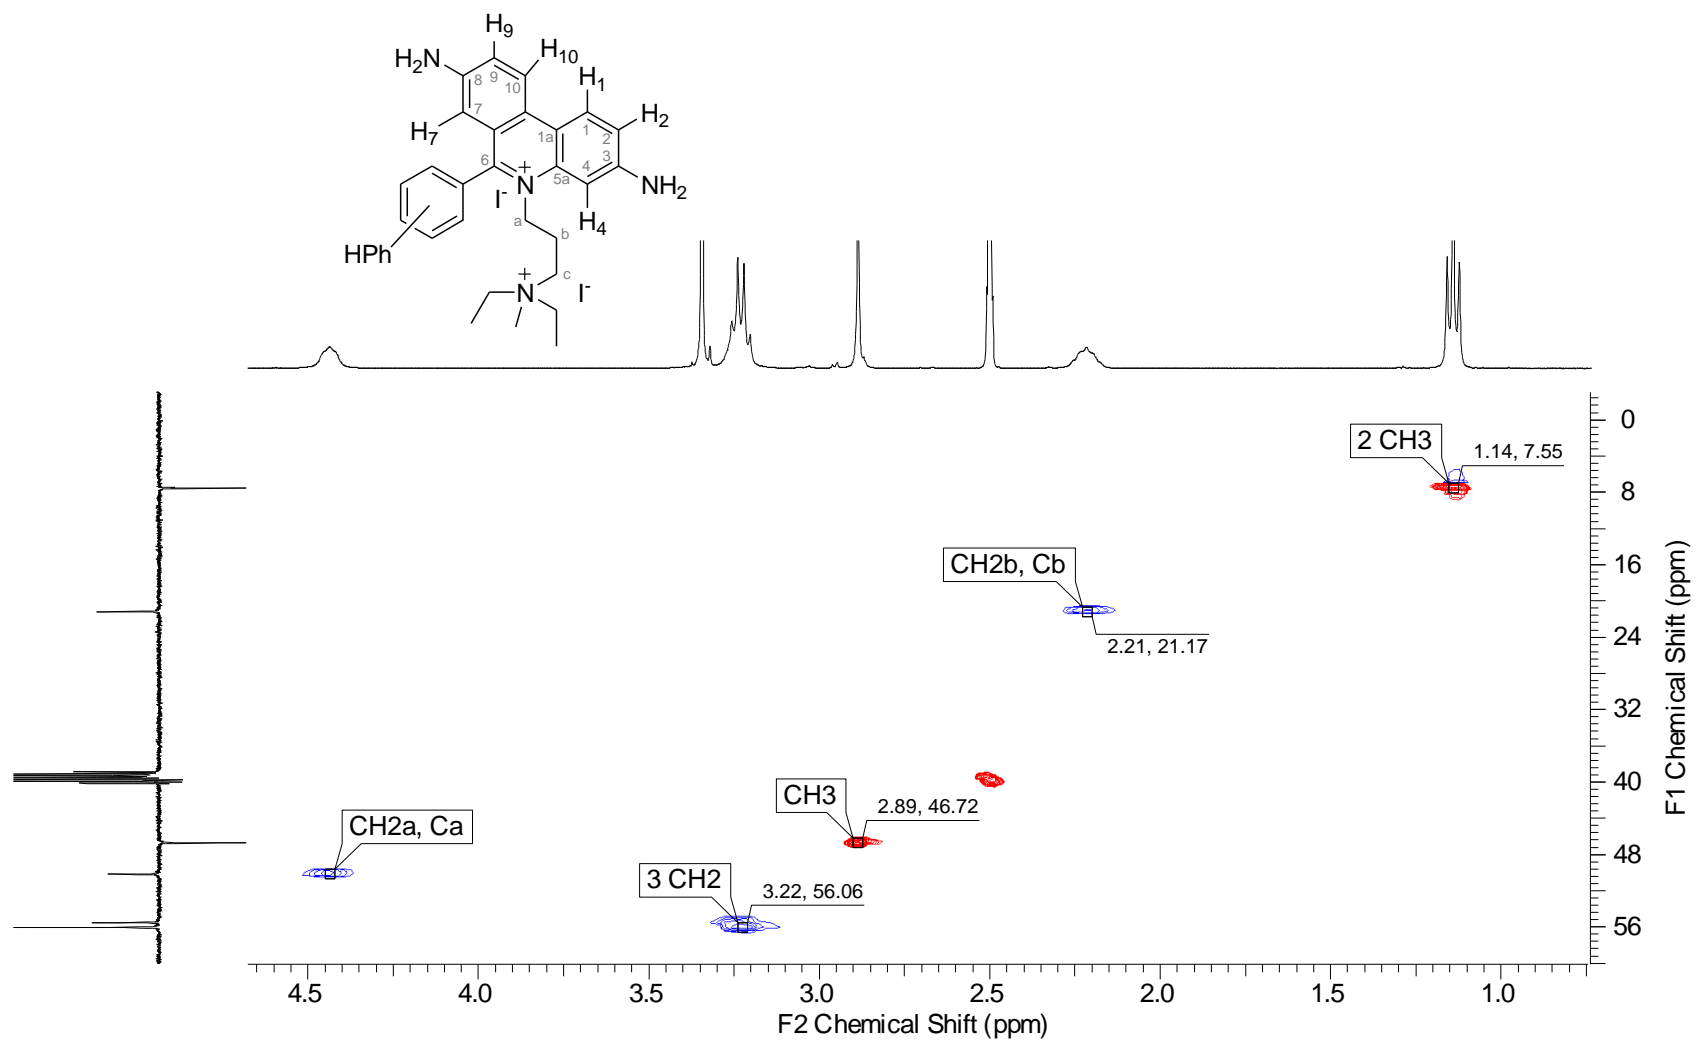

Supplementary Figure 3c. <sup>1</sup>H-<sup>13</sup>C HSQC NMR spectrum of propidium (Pr<sup>++</sup>) in DMSO-*d*<sub>6</sub> (zoomed).

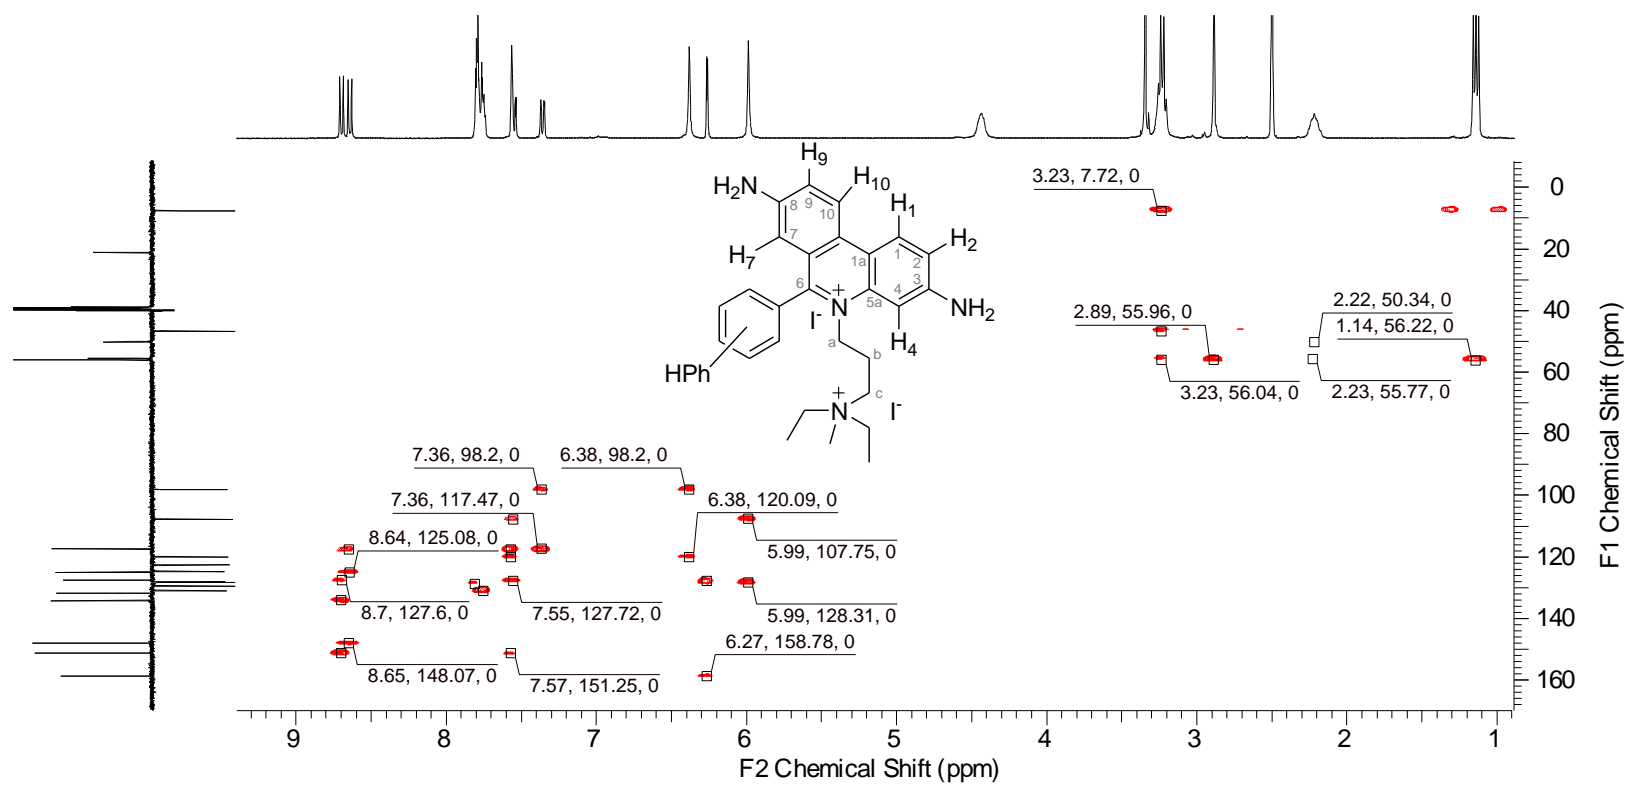

Supplementary Figure 3d. <sup>1</sup>H-<sup>13</sup>C HMBC NMR spectrum of propidium (Pr<sup>++</sup>) in DMSO-*d*<sub>6</sub>.

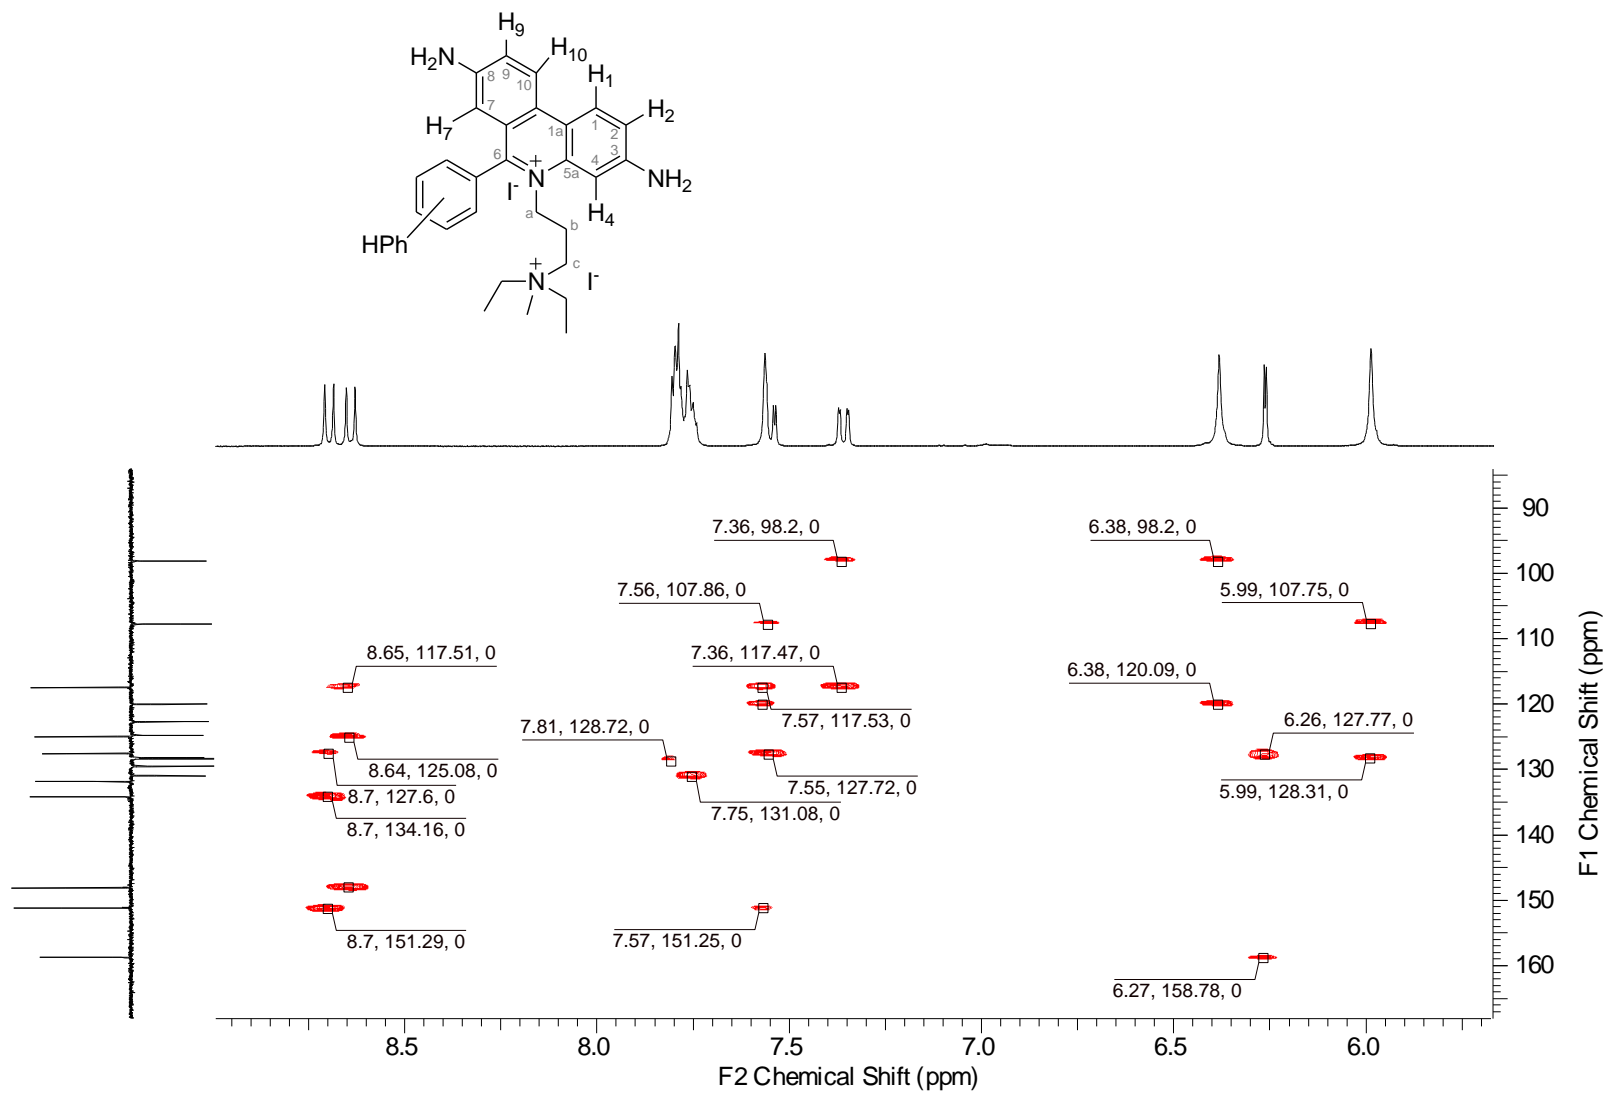

Supplementary Figure 3d. <sup>1</sup>H-<sup>13</sup>C HMBC NMR spectrum of propidium (Pr<sup>++</sup>) in DMSO-*d*<sub>6</sub> (zoomed).

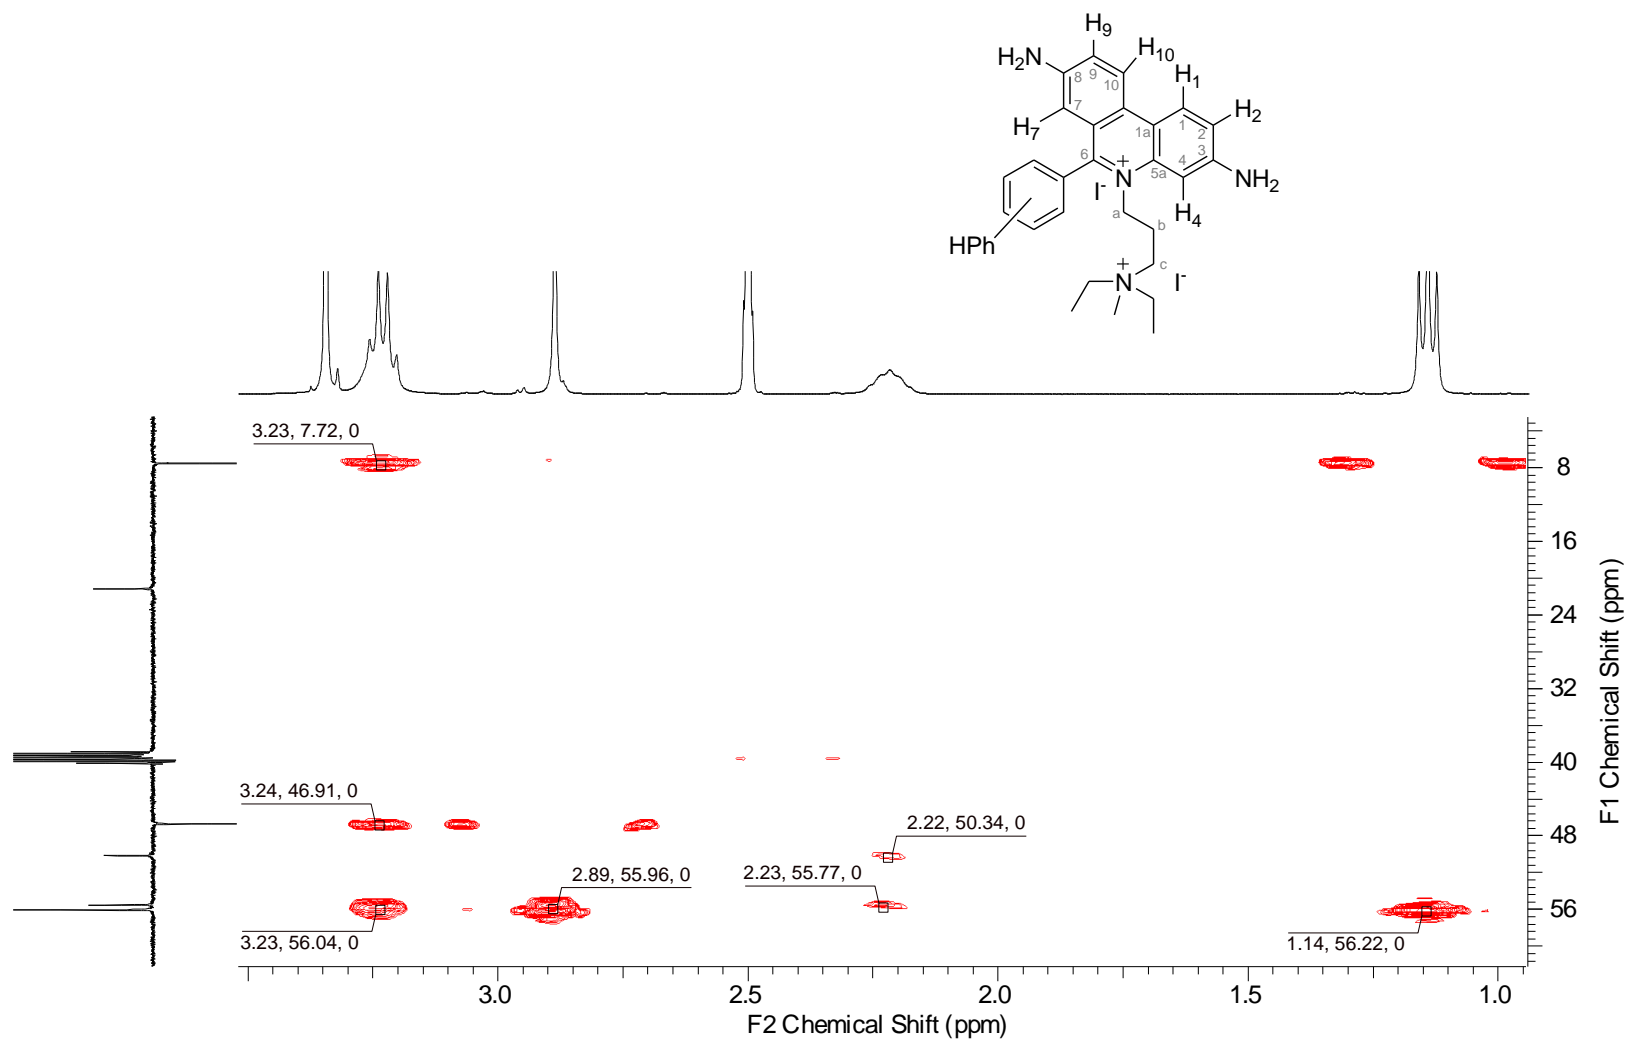

**Supplementary Figure 3d.** <sup>1</sup>H-<sup>13</sup>C HMBC NMR spectrum of propidium (Pr<sup>++</sup>) in DMSO-*d*<sub>6</sub> (zoomed).



ProtonPrPr.1r.esp

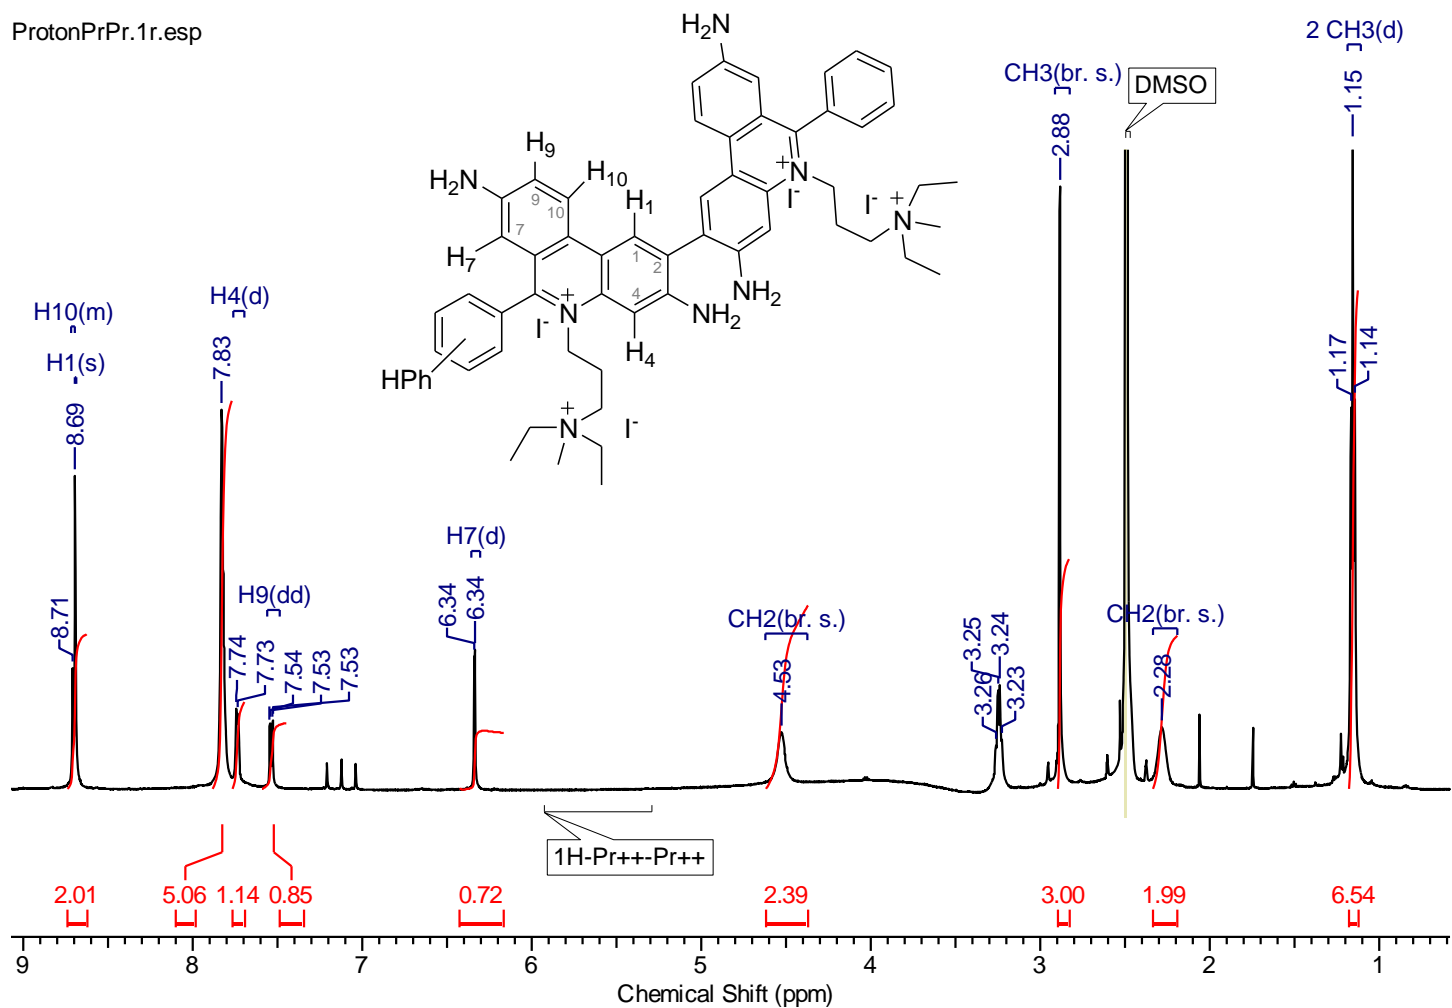

**Supplementary Figure 4a.** <sup>1</sup>H NMR spectrum of dipropidium (Pr<sup>+</sup>-Pr<sup>+</sup>) in DMSO-*d*<sub>6</sub>.

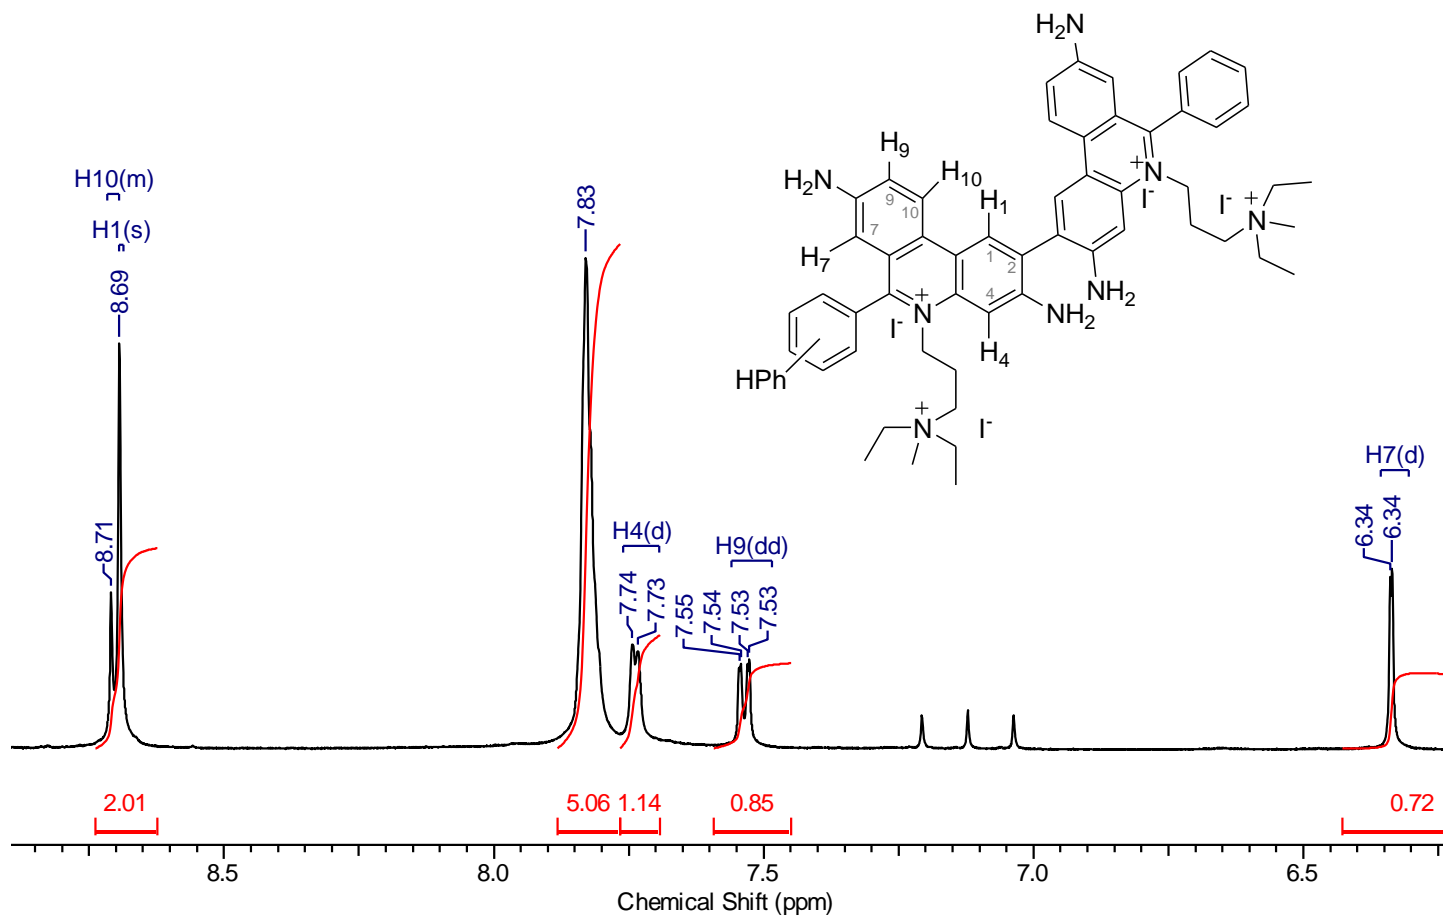

**Supplementary Figure 4a.**  $^1\text{H}$  NMR spectrum of dipropidium (Pr<sup>+</sup>-Pr<sup>+</sup>) in DMSO-*d*<sub>6</sub> (zoomed region 6.3 – 8.8 ppm).

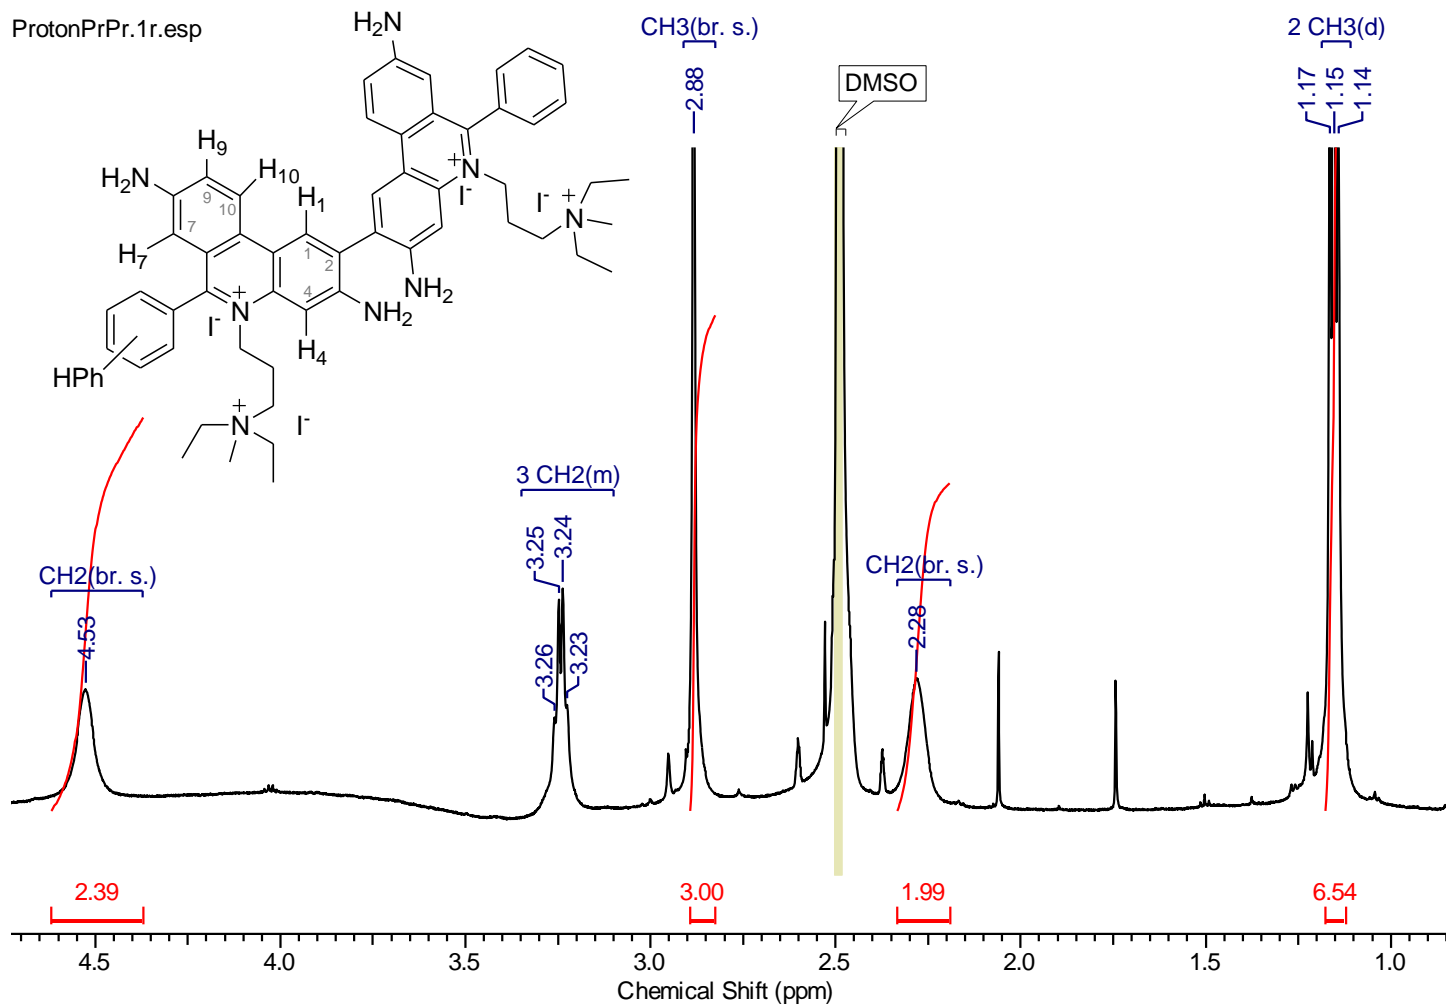

**Supplementary Figure 4a.** <sup>1</sup>H NMR spectrum of dipropidium (Pr<sup>+</sup>-Pr<sup>+</sup>) in DMSO-*d*<sub>6</sub> (zoomed region 0.9 – 4.6 ppm).

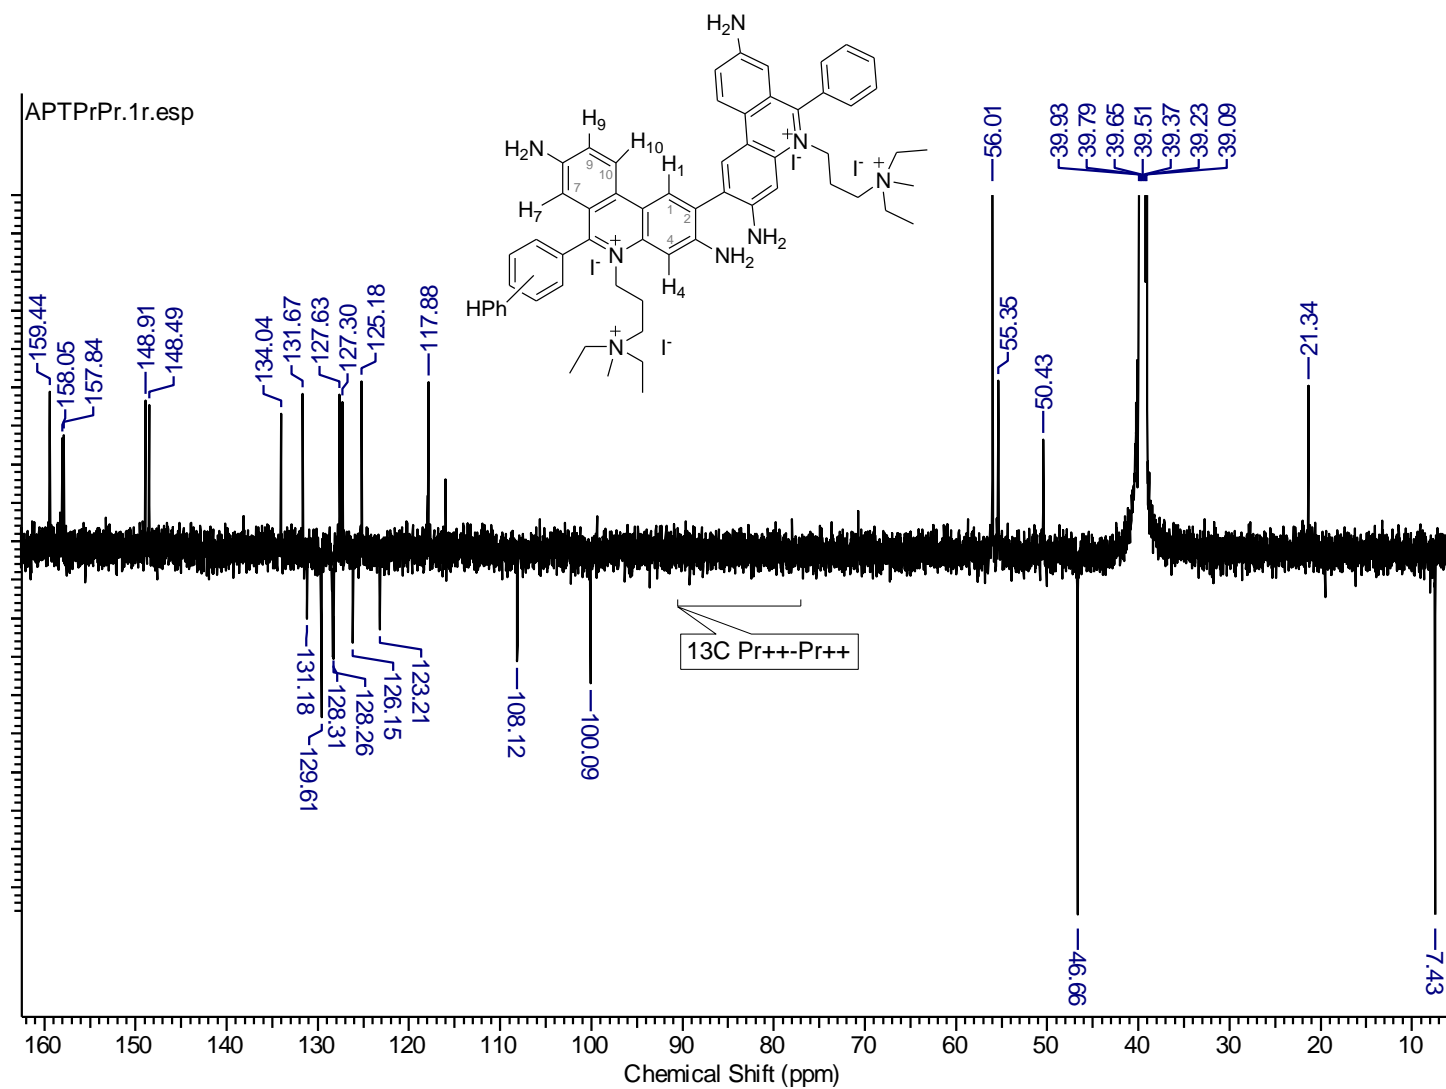

**Supplementary Figure 4b.**  $^{13}\text{C}$  APT NMR spectrum of dipropidium ( $\text{Pr}^+-\text{Pr}^+$ ) in  $\text{DMSO}-d_6$ .

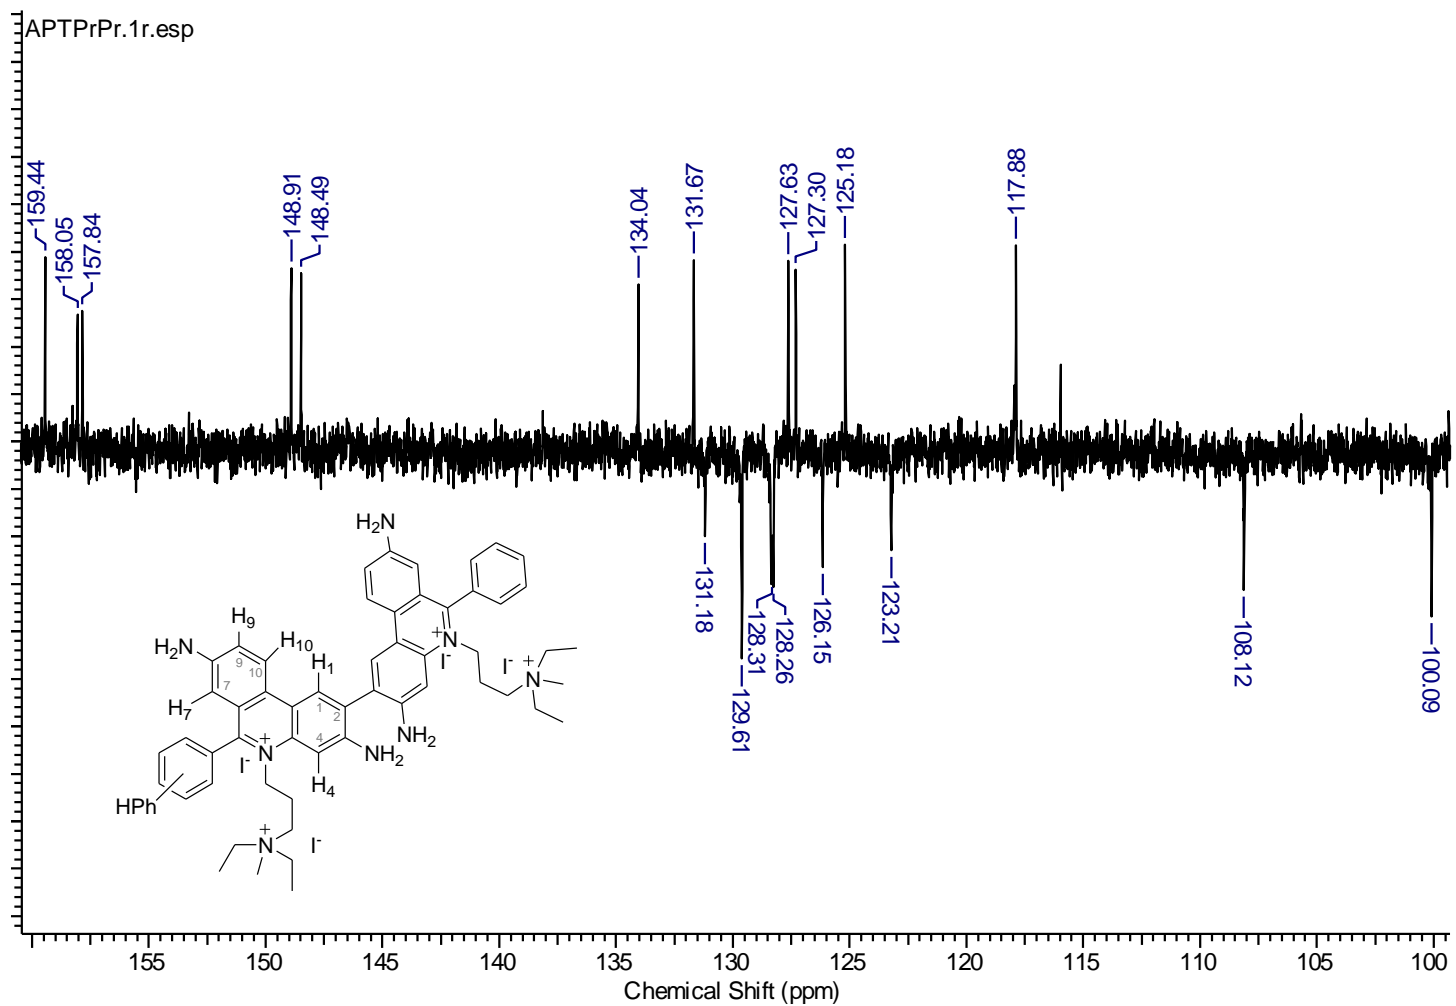

**Supplementary Figure 4b.**  $^{13}\text{C}$  APT NMR spectrum of dipropidium ( $\text{Pr}^{++}\text{-Pr}^{++}$ ) in  $\text{DMSO-}d_6$  (zoomed region 99.5 – 160.5 ppm).

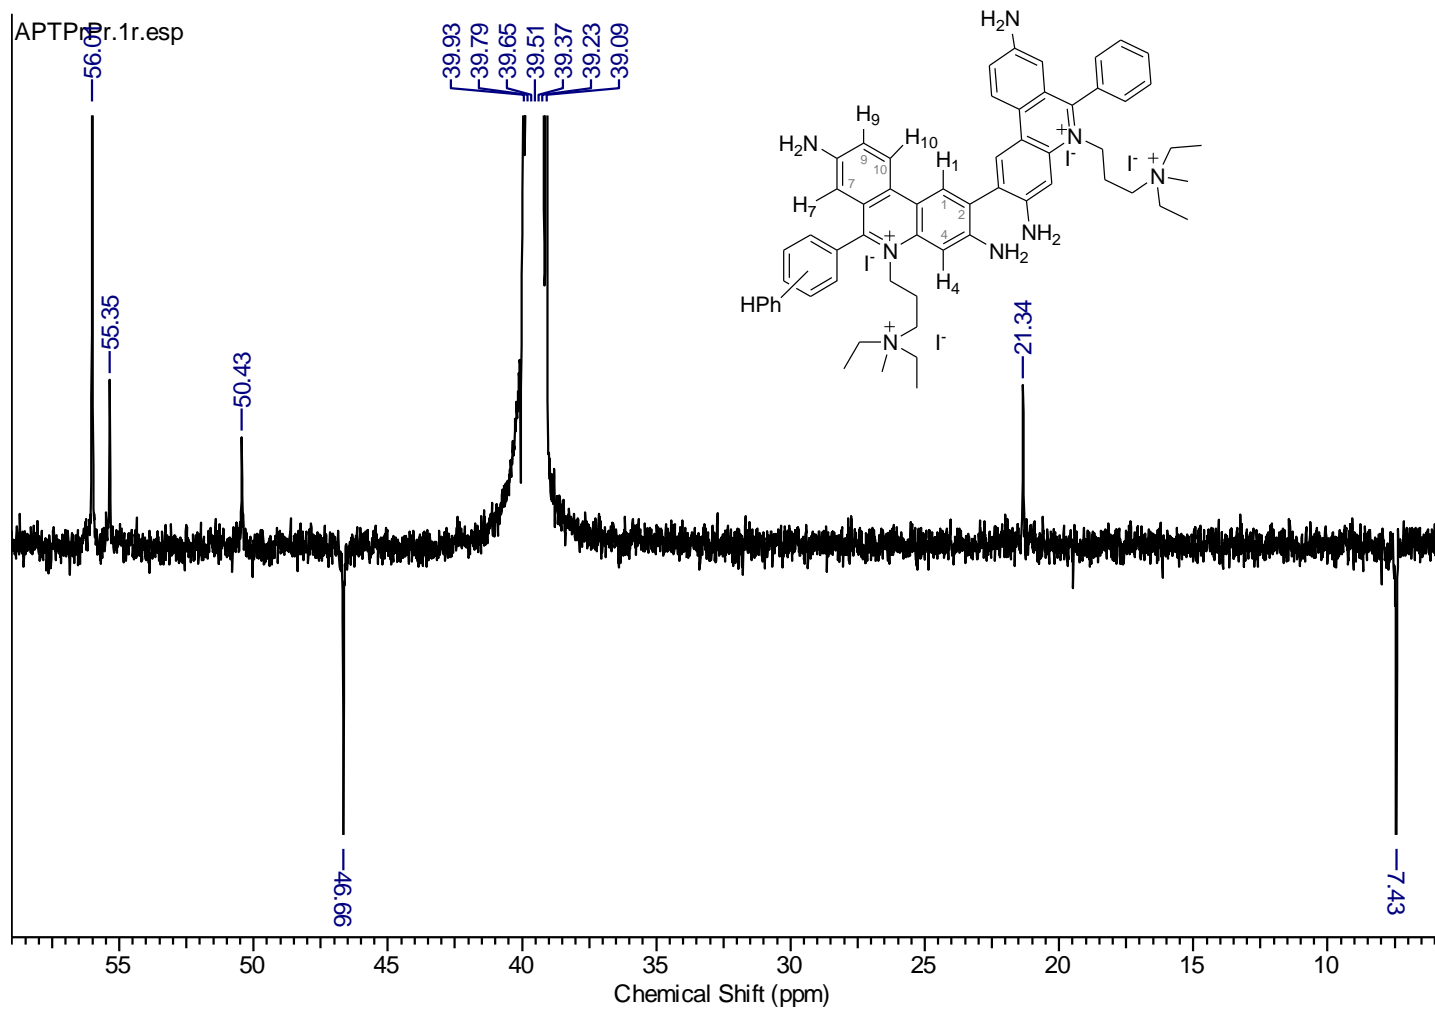

**Supplementary Figure 4b.**  $^{13}\text{C}$  APT NMR spectrum of dipropidium ( $\text{Pr}^{++}\text{-Pr}^{++}$ ) in  $\text{DMSO-}d_6$  (zoomed region 6 – 58 ppm).

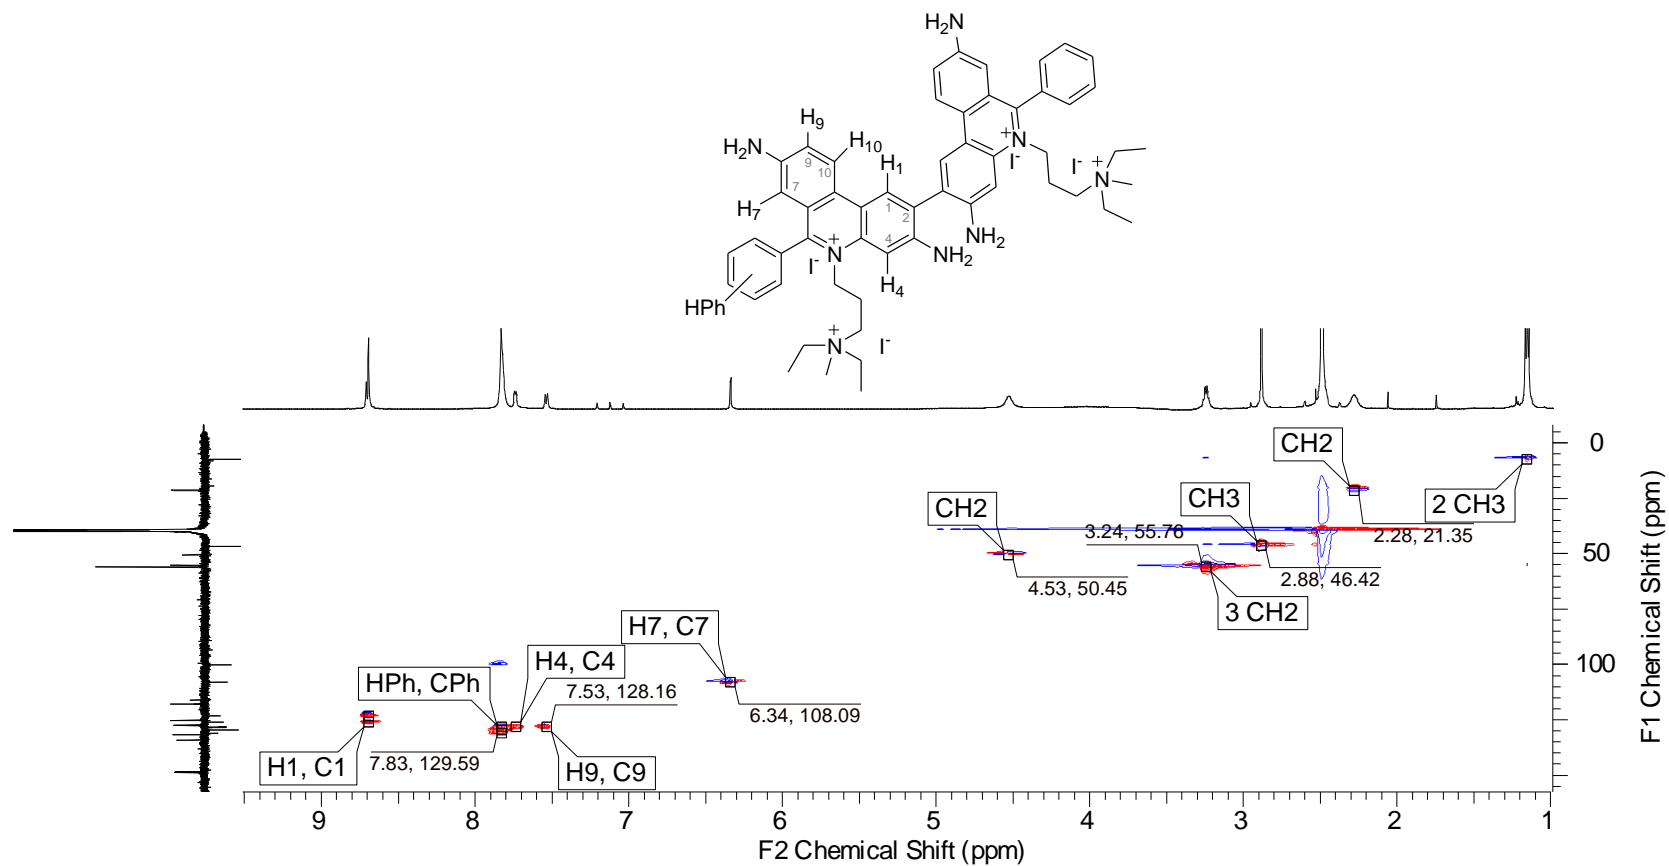

Supplementary Figure 4c. <sup>1</sup>H-<sup>13</sup>C HSQC NMR spectrum of dipropidium (Pr<sup>++</sup>-Pr<sup>++</sup>) in DMSO-*d*<sub>6</sub>.

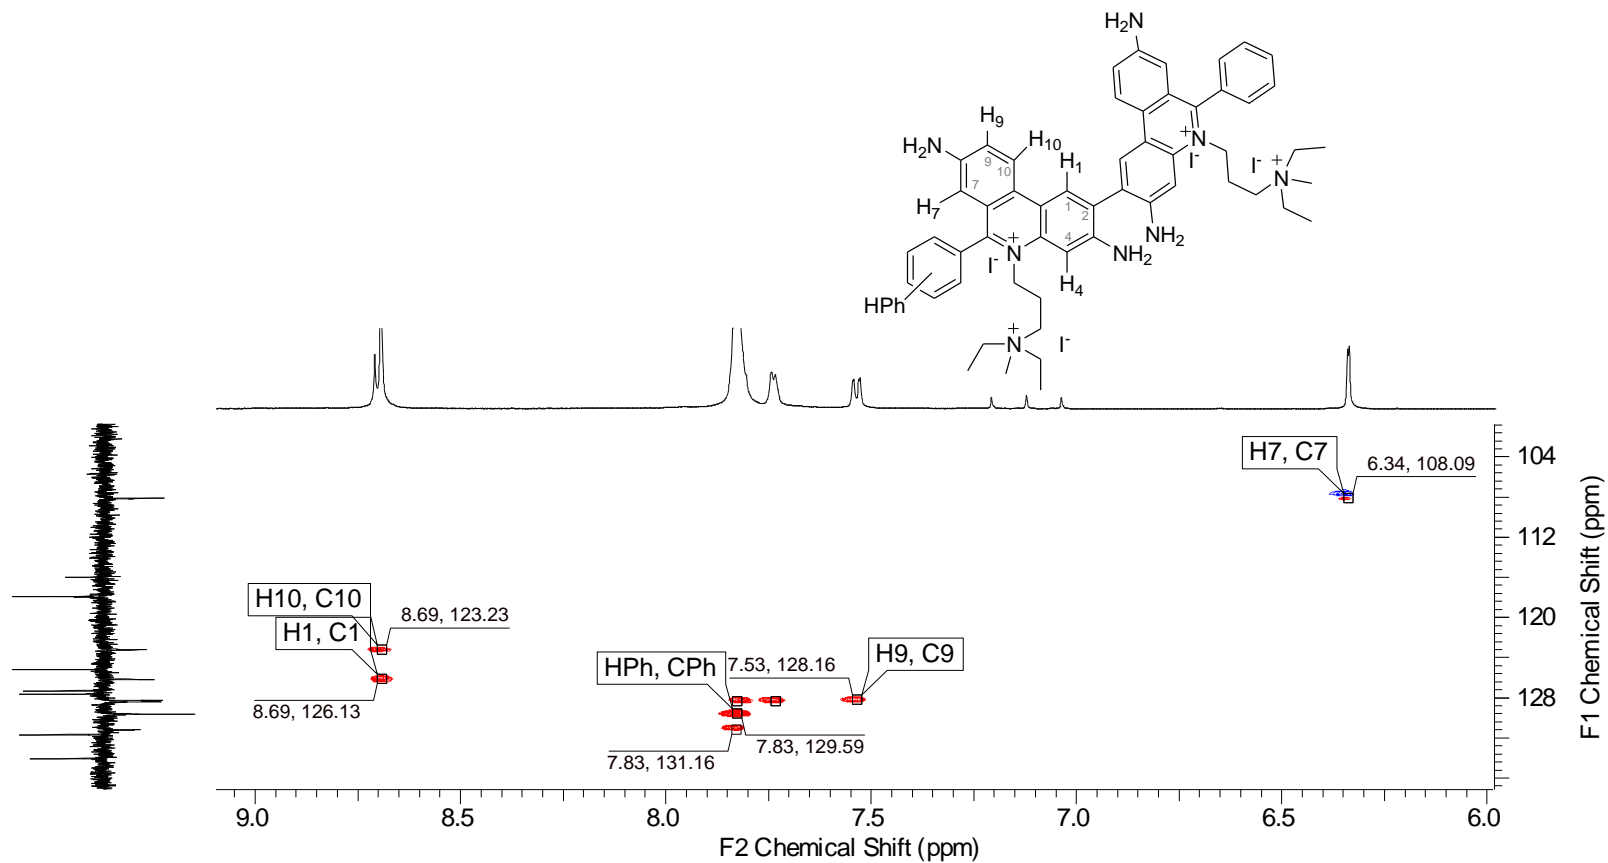

Supplementary Figure 4c. <sup>1</sup>H-<sup>13</sup>C HSQC NMR spectrum of dipropidium (Pr<sup>+</sup>-Pr<sup>+</sup>) in DMSO-*d*<sub>6</sub> (zoomed).



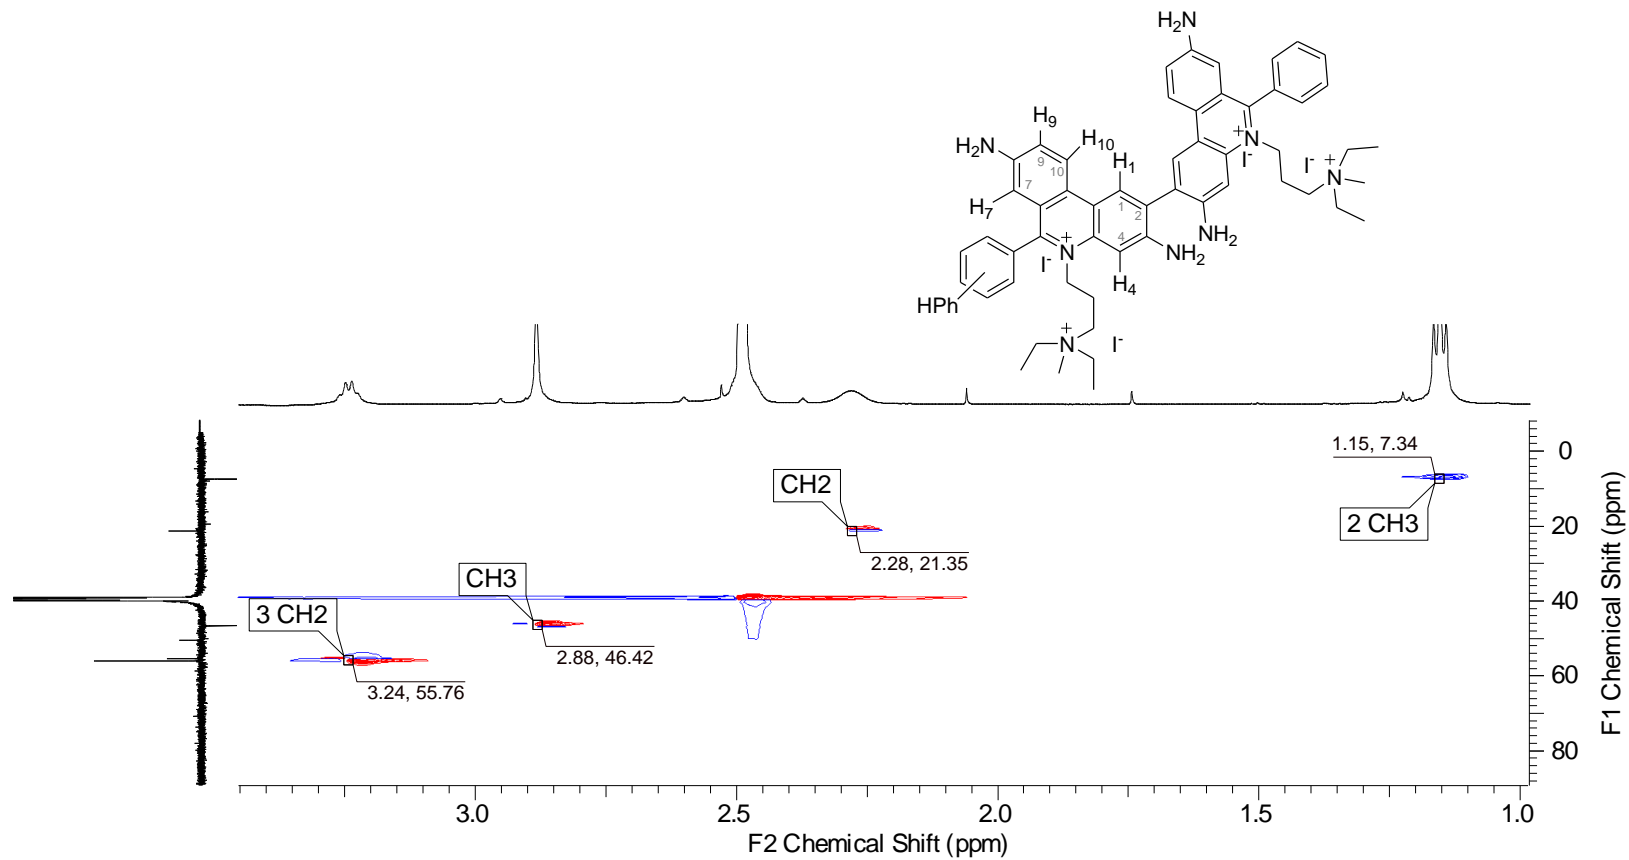

**Supplementary Figure 4c.** <sup>1</sup>H-<sup>13</sup>C HSQC NMR spectrum of dipropidium (Pr<sup>+</sup>-Pr<sup>+</sup>) in DMSO-*d*<sub>6</sub> (zoomed).

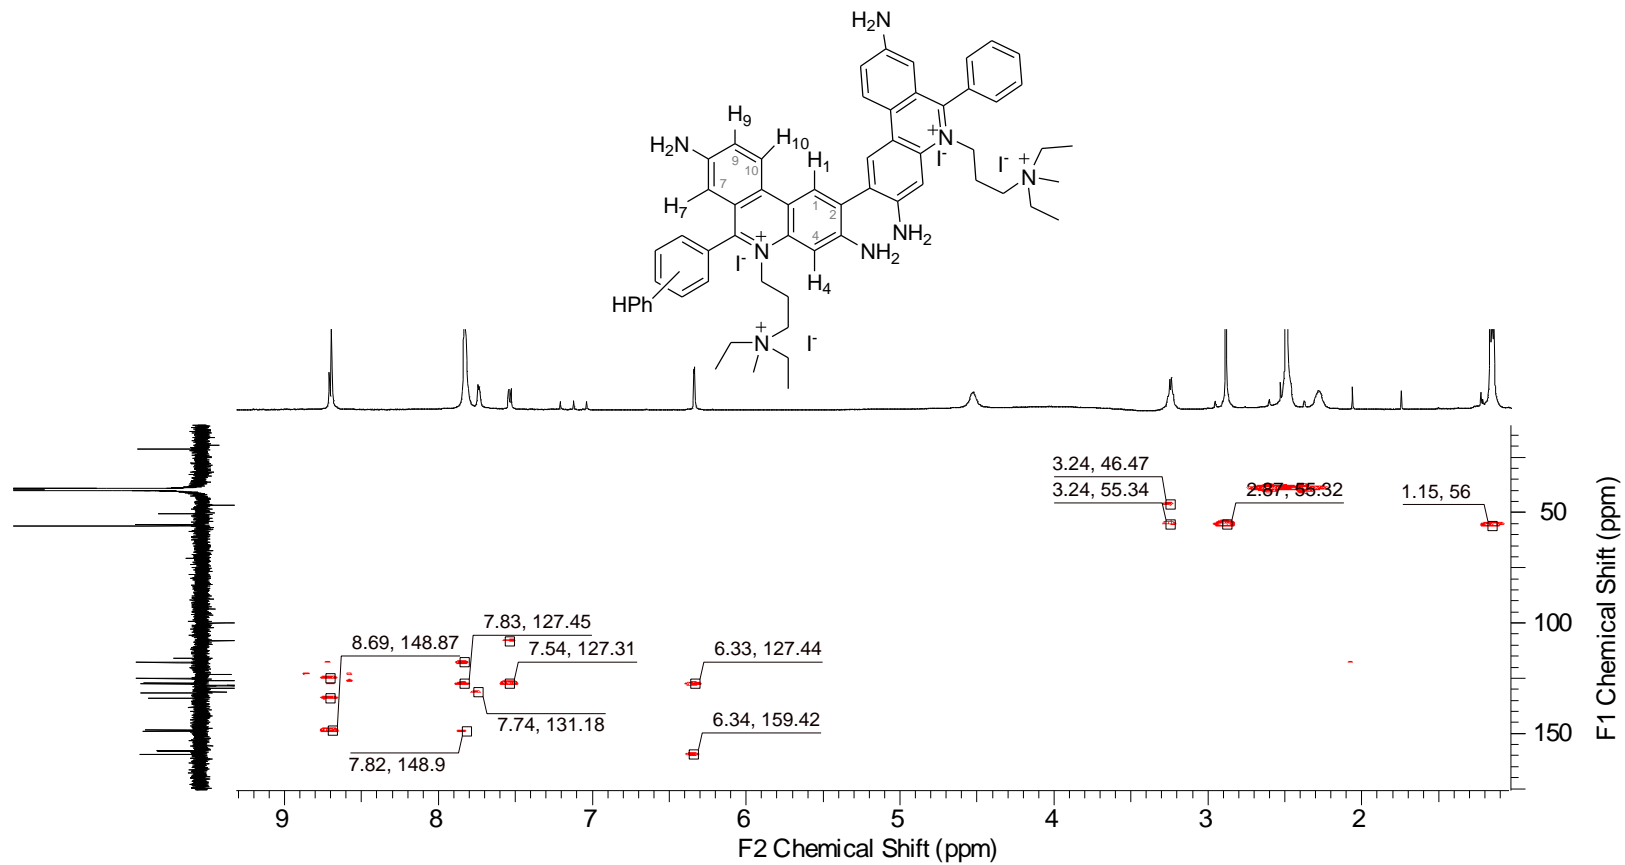

**Supplementary Figure 4d.** <sup>1</sup>H-<sup>13</sup>C HMBC NMR spectrum of dipropidium (Pr<sup>+</sup>-Pr<sup>+</sup>) in DMSO-*d*<sub>6</sub>.

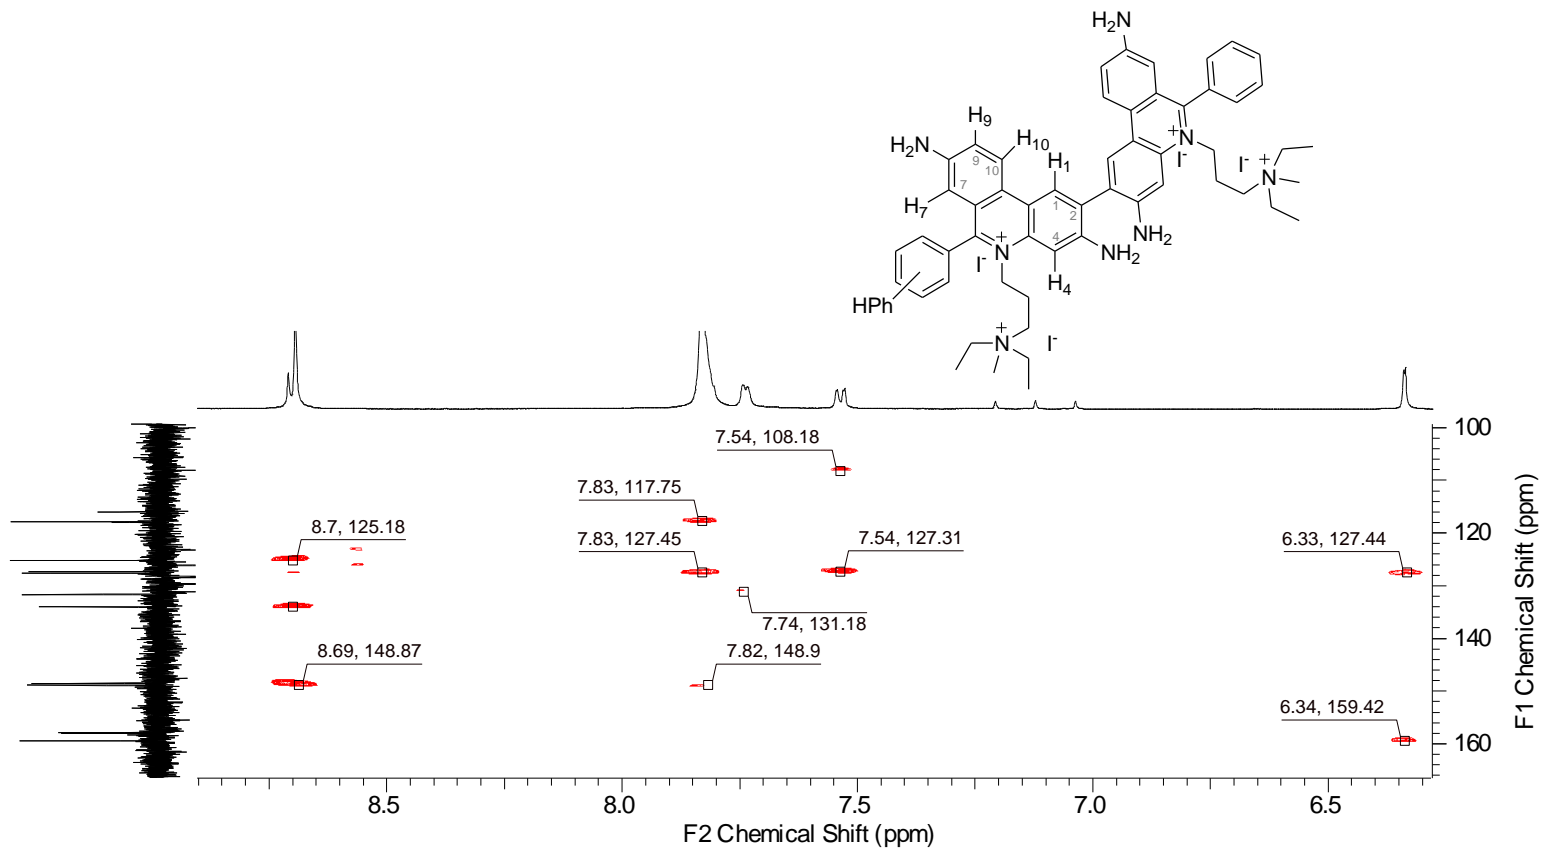

**Supplementary Figure 4d.**  $^1\text{H}$ - $^{13}\text{C}$  HMBC NMR spectrum of dipropidium ( $\text{Pr}^{++}$ - $\text{Pr}^{++}$ ) in  $\text{DMSO-}d_6$  (zoomed).

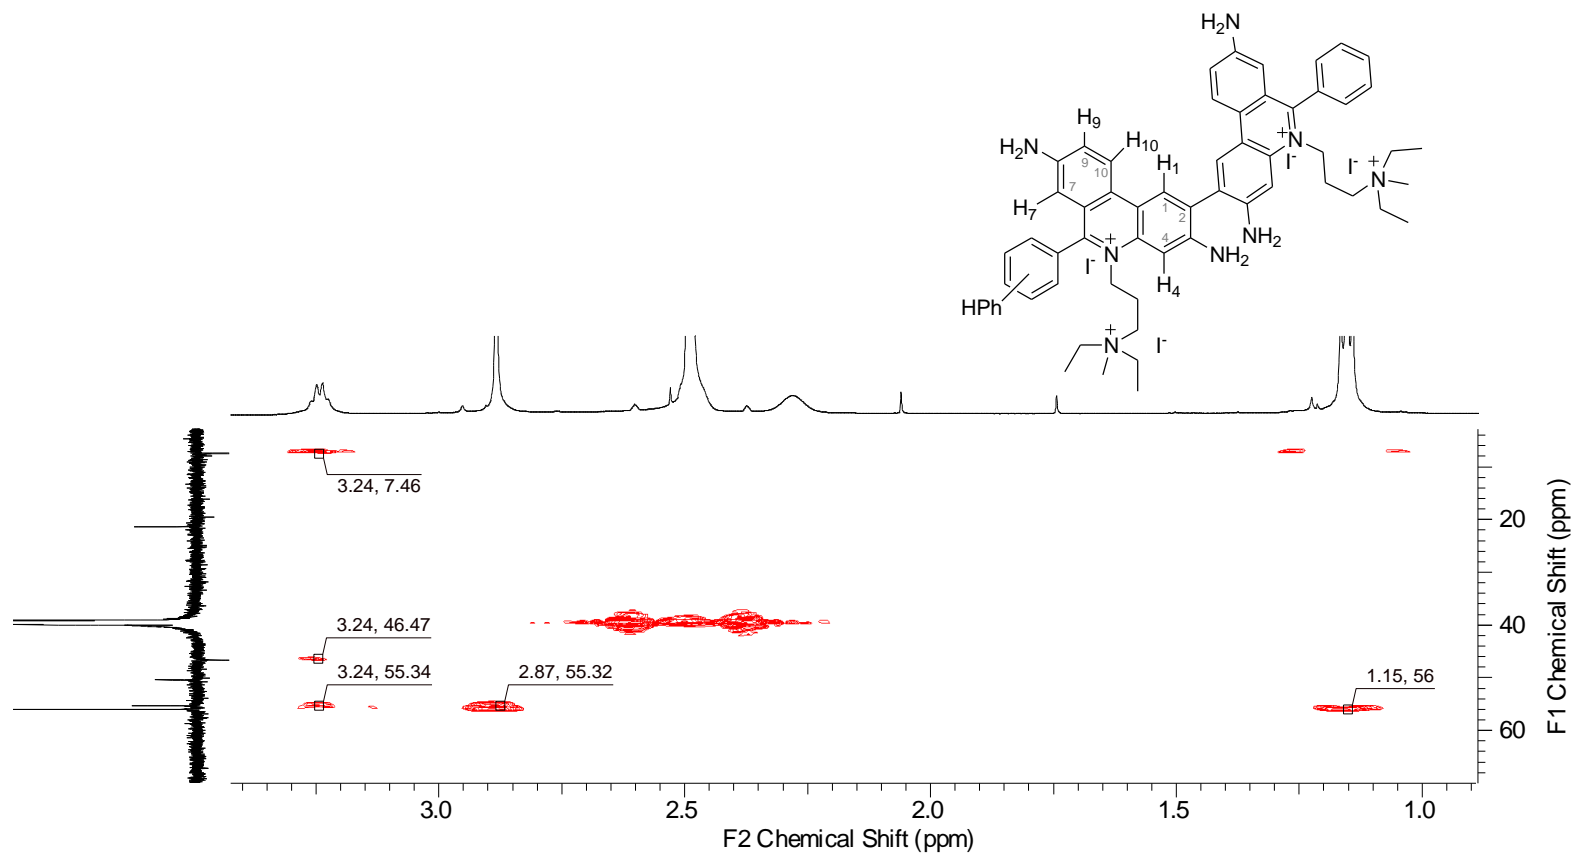

**Supplementary Figure 4d.** <sup>1</sup>H-<sup>13</sup>C HMBC NMR spectrum of dipropidium (Pr<sup>++</sup>-Pr<sup>++</sup>) in DMSO-*d*<sub>6</sub> (zoomed).
